# Supplementary material for: Expansion of Human-Specific GGC Repeat in Neuronal Intranuclear Inclusion Disease-Related Disorders
Source: PubMed Central journal article supplement (PMC6612530; doi:10.1016/j.ajhg.2019.05.013), 2019-06-06
Supplement: mmc1.pdf [file mmc1.pdf]

## Supplemental Data

### Expansion of Human-Specific GGC Repeat

### in Neuronal Intranuclear Inclusion

### Disease-Related Disorders

Yun Tian, Jun-Ling Wang, Wen Huang, Sheng Zeng, Bin Jiao, Zhen Liu, Zhao Chen, Yujing Li, Ying Wang, Hao-Xuan Min, Xue-Jing Wang, Yong You, Ru-Xu Zhang, Xiao-Yu Chen, Fang Yi, Ya-Fang Zhou, Hong-Yu Long, Chao-Jun Zhou, Xuan Hou, Jun-Pu Wang, Bin Xie, Fan Liang, Zhuan-Yi Yang, Qi-Ying Sun, Emily G. Allen, Andrew Mark Shafik, Ha Eun Kong, Ji-Feng Guo, Xin-Xiang Yan, Zheng-Mao Hu, Kun Xia, Hong Jiang, Hong-Wei Xu, Ran-Hui Duan, Peng Jin, Bei-Sha Tang, and Lu Shen

## **Supplemental Note**

### **Case Report**

#### **Case F1-IV: 6**

A 47-year-old male presented with limb weakness for 14 years. His four brothers also presented with muscle weakness in their early 30s. Muscle weakness began in the distal portion of the lower limbs, then moved up to the throat muscles and face. He routinely felt numbness in his limbs. The neurological examination revealed miosis, muscle atrophy, bilateral hand resting tremor, postural tremor, intention tremor, ataxia and weakness of the four limbs. Mini-Mental State Examination (MMSE) score was 29. Nerve conduction studies showed slowed motor and sensory nerve conduction velocity. Eosinophilic intranuclear inclusions were found in his skin samples, and the diagnosis of NIID was made.

#### **Case F6-II: 3**

A 49-year-old male was admitted to the hospital because of progressive slow walking over the last 3 years. The man was diagnosed with Parkinson's disease in 2017, and showed good response with dopaminergic therapy. He also complained about sleep disorders, constipation, and urgency of urination. The neurological examination revealed muscle rigidity and bradykinesia of right upper and lower limb. Unified Parkinson's disease rating scale (UPDRS) motor score was 5. Memory, orientation, and calculation were normal. The Mini-Mental State Examination (MMSE) score was 30, and the Montreal cognitive assessment scale (MoCA) score was 25. Blood chemistry was normal. Further skin biopsy confirmed the diagnosis of NIID.

#### **Case F9-II: 6**

An 81-year-old male presented with progressive cognitive decline for 10 years, and was diagnosed with Alzheimer's disease in 2015. His medical history included hypertension, diabetes, and he had to wear a catheter at all times due to urine retention over the past 10 years. His siblings had also been diagnosed with Alzheimer's disease. He had experienced several loss of consciousness episodes that lasted a few minutes each. The neurological examination revealed cognitive impairment, miosis, bilateral hand resting tremor, muscle rigidity, and bradykinesia. His brain DWI images showed typical high signal in the corticomedullary junction, Fluid-attenuated inversion

recovery (FLAIR) images showed severe white matter hyperintensity. CSF examination was normal, including the protein level and cytology. Electroencephalogram showed an increase in slow waves and no epileptiform discharges. He further received a skin biopsy which confirmed the diagnosis of NIID.

### **Case SP1**

A 69-year-old male with left hemiplegia was admitted to the hospital. There was no medical history or family history for him. The neurological examination revealed complete recovery from the left hemiplegia. MMSE score was 27. No typical high signal in acute cerebral infarction was observed in DWI, while symmetrical hyperintense linear lesions was presented in the corticomedullary junction. Nerve conduction studies showed slowed motor and sensory nerve conduction velocity. His skin samples indicated typical NIID pathology.

**Figure S1. Summary of Reads Covering Expanded Repeat Region from Oxford Nanopore Platform.**

| ID       | Reads  | Insertion Size | Repeat Number | Repeat Pattern | Match Ratio (observed read/pure repeat) |
|----------|--------|----------------|---------------|----------------|-----------------------------------------|
| F1-IV:7  | read 1 | 666            | 222           | GGT            | 77%                                     |
|          | read 2 | 645            | 215           | GGT            | 74%                                     |
| F1-IV:15 | read 1 | 344            | 114           | GGT            | 88%                                     |
|          | read 2 | 340            | 113           | GGC            | 78%                                     |
|          | read 3 | 295            | 98            | GGC            | 86%                                     |
|          | read 4 | 370            | 123           | GGT/GGC        | 81%/78%                                 |
| F2-II:3  | read 1 | 561            | 187           | GGC            | 74%                                     |
|          | read 2 | 568            | 189           | GGC            | 71%                                     |
|          | read 3 | 625            | 208           | GGC            | 73%                                     |
|          | read 4 | 628            | 209           | GGC            | 83%                                     |
|          | read 5 | 635            | 211           | GGC            | 76%                                     |
| F4-II:2  | read 1 | 322            | 107           | GGT/GGC        | 80%                                     |
|          | read 2 | 327            | 109           | GGT/GGC        | 79%/77%                                 |
|          | read 3 | 384            | 128           | GGC/AGC        | 87%/83%                                 |
|          | read 4 | 410            | 136           | GGC            | 76%                                     |
|          | read 5 | 357            | 119           | GGC            | 83%                                     |
|          | read 6 | 342            | 114           | GGC            | 84%                                     |
| F5-II:1  | read 1 | 342            | 114           | GGC            | 84%                                     |
|          | read 2 | 263            | 87            | GGC            | 84%                                     |
|          | read 3 | 248            | 82            | GGC            | 87%                                     |
| F5-II:4  | read 1 | 311            | 103           | GGT/GGC        | 86%/84%                                 |
|          | read 2 | 348            | 116           | GGT            | 88%                                     |
| F9-II:6  | read 1 | 345            | 115           | GGC            | 78%                                     |
|          | read 2 | 396            | 132           | GGC            | 85%                                     |
|          | read 3 | 403            | 134           | GGC            | 78%                                     |
|          | read 4 | 449            | 149           | AGC            | 81%                                     |
|          | read 5 | 356            | 118           | GGC            | 82%                                     |
|          | read 6 | 385            | 128           | GGC            | 77%                                     |
|          | read 7 | 343            | 114           | GGT/GGC        | 77%/84%                                 |

**Raw sequence data of expanded repeat region from Oxford Nanopore platform.**

**F1-IV:7-read 1**

ACCATAAGTGTTTAGAAGTTTGAATTTTATCCTAGGGAGCTAGGGAGAGGTTCT  
ATGGGTAGATTTCCCTCATCCCAACAGATTGTAAAACCTCCACATCCAATTAGTC  
ACACCTCCATTTTTTTTCTGTTTCTTTAACATTGTCTCAGATTCATTCCTTCTGA  
AATCTACCTTATTAGTTCAGGTCTTCTTAAATTTGTGCTCTGGACTGTTCACTCA  
ACTCTTTGACTGGTCCTGGGCTCCAGTTCACCTCTTGCTCTAAATAATCAATTT  
TCTACAGAACTACTGAGCAATCTCCTTCCATCAATCTCAACTCTGTTCAAAAAA  
CTTGTTGTGTTTTATAGACCCAAGAGGTAGCTGCTCCCACCCTTTCAGCTTGCT  
AGTCTGGCTGTACACTGTCCCAACCCCTTTTCCTATTCTTGACTCCTCCTCTCA  
CTGCTAACAGAGACAGAACTCATTTACTTACTCTTTGACTGTAATTTTCGAGCC  
ACGAGGGCTCTTCCGAATGATATGTCCATACTACTATTGTTGTTGTTCTTACTT  
TTAGCCTCTTTTTCTTAGCCCACTTGTACCCAGGTTTGACTACACCCTACTCTC  
CTGCCCTGAAGTAACTAATATTCTGGTTATAGTTCTTAATATCTATATCTATACAT  
TCTATATATATGCATCCACAGATAATGTAGTATTGTCTTTAAAAAATATACATGT  
ACCGTATACTTTTGTCTCCTCTCTGCATTAGCTTTTTTTCATCATTTATTTTT  
AAGATTTATCCCTATTGGACATAAATAGCTATAGTCTTTTCAATTACTGTGTTGC  
ATTTTACCTTATAAATATGCTCATACTATTGTCTATCCATTCCCTCTAAGGTGTGGCA  
TTTATGTTGTTTTCAAGGTTTTGCTATTACAGTGTTAGATAAATATCCTTAGCTTA  
GCTGGTCTCCTTGTCTTATACAAATTTTACGACCTTTCAGATCCTGCTTTCATC  
CCAGCCTCTGGGAAAGCTCTTCCCTGAACTTTCAGCCTTGGCTGTGCCAGCAAA  
GTCTGGCATCAAAGTTGCTTGCATCTTTGGTATCATCCCACTGCTAAAGCACAA  
CAGCTACTAAAGTAAGGCACTTTAAGAAATATCTGCCACACGGATGAATGTGA  
ATGAATGAATGGGGCAGTACCACTCGTGATGGCTCTATTCTTTTAAATGGACTA  
TGCTGGGCCTACTTCCTTCTTTGGATGTTAATCATCCACTCCAGAGCATTCTCT  
AGCTAGCAAAGCAGTGTGGATGTGGGTGTAGGTGGCGATGCCAGACTCACTG  
GATGAGGACCGCCTCCCTGCAAGTCACGATCCCGGCAACTCCAGTGCTTGAA  
GTTTCAAGAGTCCACCCACCCCTCACCTCCACGCCCTTCTGCACTGGTCGT  
TTTTGAAGGAGCCGCTTGGCCCTGATCGAGTTAAGGCTGCTGGAGAAGGATGC  
GGACGGGCCAGTGACTCGTAGTAGATCCTCCGCGCGAGCTCGGGTCCGGCGCT

TCTTCCTGCGGGAAACCCTGGTGCCCAAGGTGGCGGGGGCTGAGGCTGCGGC  
GACAGTGGGTAACAGGTGGGAGGAGTGGCTGAGGGAAGGATTGGTCGAGGA  
TGCTTCTGCTGCACACCTGAGAAAGTTTCACAAAACCTTCGGGCGGCGGCTGG  
AGGCGGCGGCCGAGGAGCGCGGACCTGGGGCGCGGGGAGTCGAGGCATTTG  
CGCTTCTGTAAGCTGACTGTGTTAGGGCTTGAGTTTTTTGAAGCAGGAGGAGGG  
GAGGAGAGAGGGGTTTCACGGGGACCTTCCCATGTGGATTCAAGCCCA**GGTG**  
**GCGGTGGCGGGGCAGTGGCGGTGGTGGCGGTGGTGGTGGCGGTGGCGGTGG**  
**CGGTGGTGGTGGTGGTGGTGGTGGTGGTGGTGGTGGTGGTGGTGGTGGTGG**  
**TGTGGGTGGTGGCGGGTGGTGGTGGCGGTGGTGGTGGCGGTGGTGGTGGCGG**  
**TGGCGGTGGCGGCGGCAGGTGGTGGTGGCGGGTGGGTGGTGGTGGTGGTGG**  
**GTGGTGGTGGTGGTGGTGGTGGTGGTGGTGGTGGTGGTGGTGGTGGTGGTGG**  
**GAGAGGTGGTGGTGGAGGGAGGTGGGTGGTGGAGGGAGGTGGTGGTGGAGG**  
**AGTGTGGTGGTGGAGGAGGTGGGTGGTGGAGGGAGGTGGTGGTGGAGGGAG**  
**GTGGTGGTGGAGGGAGGTGGTGGTGGAGGAGGTGGTGGGTGAGGAGGTGGG**  
**TGGTGGGAGGGAGGTGGTGGTGGAGGAGGTGGTGGTGGTGGTGGTGGTGGT**  
**AGAGGGAGGTGGTGGTGGAGGGAGGTGGTGGTGGAGGAGGTGGTGGTGGAG**  
**GAGGTGGCGGTGGAGGAGGTGGTGGTGGAGGGAGGTGGTGGTGGAGGAGGTG**  
**GTGGTGGAGGAGGTGGTGGTGGAGAGGTGGGTGGTGGAGGAGGGTGGTGGC**  
**GGGAGGAGGTGGCGGCGGAGGAGGCGGCGGCGGGAGGAGGCGGCGGC**

**FI-IV:7-read 2**

ATTTTGACTACGTTTATTTTTGAAAAGGGTTTCCAGCATTTC AATGTGACTATCA  
CTAATGATACTTGCTTTTGCCTAAAGTGCTTGTTAATATGCAGTTTTGGAATTCT  
GGCAGGTCTATGCCCATACTGACTCTTCAATTTCTGCTTAGTGTGTTTACATCT  
CTAGTTCAACACCTATTATGTGATAGACACTGGGATTAATAGGCTGTGGTCTTT  
GCCCATGAGGACCCTCAAACCTTAGTTGAGAACACAGGAAATACAAAGAGTC  
CTGTGTGAAAAATAAGCATTGGTGTTAAGATAAAGAAGCGGGGCAGTGGAAG  
ACAGTGGAGGGATCTCTGTCTGTTAGAGGGAGGAATTTATTGCAGTGTTCGGCA  
AAGCCTTCTTTGGACTGAAGGATGAATTATGATTTAAAGTTCATTAAGAGGGA  
GGAGGGAAGGGACTACAGGAGTCATTCCAAGCCAAAGGAACAAAAGATACA  
GGGACAGAAACAGCAAGATATGTTTGGGGAATCTCTGGGTAGCTAATACTGT

TATTGTGTAAGTTCACAACAGGGGCAGGGAGGACAGGAGATGGGGCCCAATG  
ACTAGCCTTTGTATGTGCCCATGTTTAGGTTTGAATTTATCCTATAGGAGTCAGG  
AGAGGTTCTATGGGTAGGATTCCCATCCAACAGGATTGTAAACTCCTGGCAC  
ATCCAATTAGTTTACACCTCCATTTTTTTTTTCTCATTTCCTTAAACATTGTCTCAGA  
TTCATCTTCTGAAATTCACCTTATTAGTTCAGGTCTTAAATTTGTGCCTGGACT  
GTTACCAACTCGATCGGTCCTGGGGCTCCAGTTCACCTTGCCCCAACAAATCA  
ATTTTTCTACAGAACTATCAGGGACAATCTTCCTTTCCATCAATCTCAACTCTGT  
TCAAAAACCTTCAATAGTTCTTATGTGACCTAAGAGGTAGGCTGCCTCCCACCC  
TTTCAGCTTGGGCTATCTGTTGCCGTATAATTTGTCCCAAATTTCTTTCCGGTTC  
TTGACTCCTCTTCTCACTGCTAACAGAGACAGAACTATTTACTTACTCTTTGAC  
TGACCTGCTTTCACCTTAGGCTCTTCCTGAATGATATGTCCATACAACTATTGTT  
GTTGTTCCATTTTTAGCTCTTTTCTTAGCCCACTGTACCCAGGTTTGATCACACC  
CCCTACTCTGCCCTGAAGTAACCACATTCTGGTTATAGTCTTTAATATCTATATTT  
ATCTATATATGCATCCACATGGCTAATGTGTAGTATTGTCTTGAAAAATATACAT  
AAATGGTATAATTTTTGTCTCCCTTACATTAGTTTTCACTATCATTTAGTTTTAAG  
ATTTATCCTATTGACATAAATAGCTATAGTCTTTTCAATTACTGTGTTGCATTTCA  
TTTTATAAATATAACCACATTGTCTATCCATTCTCTAAGGGTGGGTATTTATGTTG  
TTTTTCAAGGTTTTACATGGTGTTACAATCTAATATCCTTAGCTTAGCTGGTCTC  
CTTGTCTTATGCTACAAATTTTACTGACCTTTCAAGATCCTGCTTTTCATCCCAG  
CTCCTTCGGGGAAAGCCTTCCTGAATCCCAGCCCACAGCGCAAAGTCTTGGT  
ACTAAAGCTGCTTGTGCATCTTGGTATCATCCTACTGCTACAATAACAGCTACT  
TAGCAAGGCACTTAAGAAATATTCGCCACACGGATGAACAAATGAATGAATGA  
ATGGGGCAGCACCCCGTGATGGCTCTCTATTCTTTAATGGACTTTATGCC  
TTGGCCCCTTCTTCTCTTTGACAGCACTGGTCCTGTACTCCAGAGCATT  
CTCTAGCTAGCAAAGCAGTGTGTGGATGTGTGGGGTGTAGGTGGCGATACAGA  
CCTCACTGGATGAGGGACCGCCTCTCCTCTGCAAGTTCACGATCCCGGCAACC  
CCAGTGCTTCAGTTCAGAGTCCCACCTCACCCCTCACCTCCACGCCCTTTCT  
GCACTGGTCAAGCCAGAGCCGCTGCAGCCCCATCGAGTTAAGGCCATGGAGA  
AGGATGCGACGGGGCCAGTGACCTGTAGATCCCTCCGCGCGGAGCCTGGGCT  
GGCGCTTCTTCTGCGGGAAACCCTGGTGCCCAAGGCGGCGGGGCCGAGCCG

CGGCGACAGGCGGGGCTTGCGGTGGAGGAGGCGGCTGAGGTGAAGGACACA  
CGAGGCTGCTGCACACCTGAGAAAGCCAGCCAAACTTCGGGCGGCGGTTCGGT  
GGCGGCTGAGAGGGCGGACCGGGGCGCGGGGAGTCGAGGCATTTGCGCTTTC  
CAAAGCCTGGACCGTAGCCAGGCCTGAGCTTGAAGCAGGAGAGGGAGAGAG  
AGTGGCCTTTCTATCGGCCTTCCTATGTGGATTCGTCGGTGGTGGCGGCGGGTG  
GCGGCGGTGGCGGTGGCGGCGGTGGCGGCGGTGGCGGTGGTGGCGGTGGTG  
GTGGTGGTGGCGGTGGTGGTGGTGGTGGTGGTGGTGGTGGTGGTGGCAG  
GCGTGGTGGTGGTGGTGGTGGTGGTGGTGGTGGTGGTGGTGGTGGTGGTGGT  
GGCGGTGGTGGTGGTGGTGGTGGTGGTGGTGGTGGTGGTGGTGGTGGTGGTGG  
GCGGGTGGTGGTGGAGGTGGGTGGTGGAGGAGGTGGTGGTGGAGGTGGTG  
GTGGAGGAGGGTGGTGGAGGGGTGGTGGAGGGAGGTGGTGGTGGGAGGGGA  
GGTGGTGGTGGGAGGGAGGTGGGTGGTGGAGGAGGTGGTGGTGGAGGAGGT  
GGTGGTGGAGAGGTGGTGGTGGAGGGAGGTGGTGGTGGAGGGAGGGGTGGT  
GGTGGAGGAGGTGGCGGGTGGAGGGAGTGGTGGTGGAGGGAGGTGGTGGTGG  
AGGGAGGTGGCGGGTGGAGGAGGTGGTGGCGGGAGGAGGTGGCGGTGGAGG  
AGGTGGCGGCGGGAGGGAGGTGGCGGGTGGTGGAGGCGGTGGCCGGAGGAGG  
TGGCGGCGGAGGAGGCGGCGGCGGAGGAGGGCGCGGCGGAGGAGGCGGCG  
GCGGAGGAGGCGGC

**F1-IV:15-read 1**

TGATAGACACTGGGGATTAATAGGCTGTGGTCTTTGCTCCATGAGGACCCCTTA  
AACTTAGTTGAGAACACAGAAATGCCAAAGAGTCCTGTGTGAAAAATAAGTAT  
TGGTGTAAAGATGGAAGAAGTTTGGTGGAAAGACAGTGGAGGGACTGTCTGTT  
GGAGGGAGGAATTTATTGTGTCGGCAAAGCCTTCTTTTGGACTGAAGGATGAA  
TATGATTAGAAGTTCATTAAGAGGAGGAGGGAGGGGACTTACAGACATTCAAG  
CCAAAGGAACAAAAGATACAGGACAGAAACAGCGCAAGATATGTTTGGGGGA  
ATCTCGTTAGCCAATACTGTTACGTGAAGTTCACAACAGGGTAGGAGGACAGG  
AGATGGGGCCCAATGACGCAAAAAGGCCTTGTATGTACCATGTTTGAAGTTT  
GAATTTATCCATAGAGTCAGGGGAGAGACTACAGTAGGATTTCCATCCCAATGT  
AGGATTGAAACCCACATCCAGTCACACCTCCATTTTTTTTTTCTTTCTGCTTTT  
AACATTGTCTCAGATTCATTCTCCTTCTGGAAATCTACTCATAGTTCAGGTCTTC



TTAAATTTGTGCCTGACTGTTACCAACTTGACTGGTCCTTAGCTCCAGTTCAC  
CTCTTGCTCCCCAACAAATCAATTTTCACAGAACTATCAGAGCAATCTTCCCTTT  
CCATCAATCAACTCTGTTCAAAAACCTTCAATAGTTTTATGACCTAAGAGGCTT  
CCTCACCTTTCAGCTTCTGCCATTCAAGGCCGTGTACTIONTTGTCCCAACCCCTT  
CCGTCCTTGGACTCCTCTCACTGCTAATGAGATACAGAACTCATTACTTACTC  
TTTGACTGTACCTTTGCTTTCACGAGGGCTCTTTCCTGGAATGATATGTCCATAC  
ACAACCTATTGTTGTTGTTCTTAGCTTTCAGTCTTTTCTTAGCCTCACTGTACCCA  
GGTTTGACCCACACCCCGCCTCCTGCCCTGAAGTAATTACTTATTCCAAGTTAT  
AGTCTCTAATATCTATATTCATATTCATATATATAACCAAATAGAGTACGTAGTATT  
GTCTTGAAAAATATACATAAATGGTATACTTTGTCTCCCTCAAGCATTAGTTTT  
TTCACTATCATTTAGTTTTTAAGATTTATCTTATTGAGGCTAAATAGCTATAGTCT  
TTTCACTCATTGTGTGTTGTGTATTTCATTTTATAAATATACCATGTTAATATTCAT  
CCATTCCTCTAAGGGTGGGTAGTACTTGTTACTTTTCAAGGTTTTGCTATTACA  
GTAACCAAATATCCTTTAGCTTAGCTGGTCTCCTTGTCTTATACAAATTTTTTAC  
TGACCTTTC AAGATCCTGCTTATCCCAGCTCCTCTGGGAAAGCCTTCCCTGAAT  
CCCCAGCCACAGCGGCAAAGTCTGGTACTCAAAGTTGCTTGTGCACTTTGGT  
GTCATCCCCTGCTACACACAGCTACGCAAAGCAAGGCACTTACATGATGATA  
GCCCAAATGAATGAATGAATGGGGCAGCACTACTCCGTGATGGCTCTATTCCTT  
TTAATGGACTTGCGCCTTGGCCCACTTTCCTTCTTTGACAGCACTGGTCCTA  
CCAGAGCACATTCTCTAGCTAGCAAAGGTGGATGTGTGGTGTAGGTGGCGATA  
CAGACCTCACTGGATGAGAACGCCTCCCTGCAAGTTCACGATCCCGGCAACCT  
GTGCTTGAAGTTCAGGGAGTCCTACCCACCCCTCACCTCCACGCCCTTCTGC  
ACTGGTCATTAAAGGAGCCGCTGCAGCCCTGATCGAGTTAAGGCTGCTGGAG  
AAGGATGCGGACGGGCCAGTGACTGTAGTAGATCCCTCTGCGCGGAGCCTGG  
CCGCGCTTCTTCTGCGGGAAACCCAGGCTCAAGGCAGCTGAGGCTCGCG  
GCGCGACAGGGCGGGGCTTATGGGAGGAGGCGGCTGAGGCGGAAAGACAC  
GAGGTTGCTTGCTGCACACTGAGAAAGTTTCAGCCAAATCTCATGGCGGGTTG  
AGGCGGCGGCCGAGGAGCGGCGGGACTCTGGGGCGCGGGGGGAGTTGAGGG  
CATTTGCGCTTGCCTTGGACCGTAGCGCCAGGGCTCTGAGCTTTGAAGCAGGG  
GAGGGAGGGGAGAGAGGCCTTCTTATCGGGACCCTTCCCATGTGGGATCTGC

CCAGGCGGCGGGCGGTGGCAGTGGGTGGTGGCGGGTGGTGGTGGTGGT  
GGTGGTGGTGGTGGTGGTGGTGGTGGTGGTGGTGGTGGTGGTGGTGGT  
GGTGGTGGTGGTGGTGGTGGTGGTGGTGGTGGTGGTGGTGGTGGTGGT  
TGGTGGTGGTGGTGGTGGTGGTGGTGGTGGTGGTGGTGGTGGTGGTGGT  
GTGGTGGTGGTGGTGGTGGTGGTGGTGGTGGTGGTGGTGGTGGTGGTGGG  
TGGTGAGGGAGGTGGTGGTGGAGAGGTGTGGTGGTGGTGGTGGTGGTGGTGG  
GAGGGAGGTGGTGGTGGAGGGAGGTGGTGTGGAGGAGGC

*F1-IV:15-read 2*

TTAGTGAGTAAAGAGGAAGATCAGACTGGTAACACTGCTTGGTCAAACA  
GAAAAATAATGTTATCTTTCTCTGAACATACTACAAGACAAATTTAAAAATATT  
TTGACTACGTTATTTTTTGA AAAAGGGTTTCCAGTATTTCAATGTGACTACTTTC  
ACTAATGATGCCTTTTCAAAGTTAACATTAACATGCAGTTTTGGAATTTTCATAG  
ATCTACCTTTATATACTGACTTGACTTGCTTAGTGTTGTTTTACATTCTAGTTCA  
ACATGTTATGTGATGAACACTGAGGTTAATGGCTGTGGTCTTTGCCCATGAGGG  
ACCTCAAACCTTAGTTGAGAACACAGAAATACAAAAGAGTCCCTGTGTGAAAA  
TAAGTATTGGTGTTAAGATAAAGAAGCTGACAGTGGAAGACAGTGGAGGGAC  
TGTCTGTTAGAGGGAGAATTGTTGGGTGTGCGGCAAAGCCCTTCTTTGGACAGA  
GATGGGAGTGTGATTAGAAGTTCATTAAGAGGAGGAGGAAGGGACTACAGTC  
ATTTCAAGCCAAAAGGAACAAAAGATACAGGGACAGAAACAGCAAAGATATG  
TTTGGGGAATCTCAAGTTAATACTGTTGTTGTGTGGGAAGTTCACAACAGGGG  
CAGGAGGAGGACAGGAGATGGGGCCAATGACGAAAAGGCCTTGATGTACC  
ATGTTTGGGGGTGGAATTTTATCCTGGAGTCAGGGAGGTTCTGGGTGGGATTTCC  
CCATCCCAACAGGATTGTAAACTCCCACATCCAATTAGTCCCTCATTTTTTTCTG  
TTCCTTTAACGTGTCTCAGATTCATCCCTTCTAAATCTACCTTATTGAGTTTCAA  
GGTCTTCTTAAATTTATTGCCTGGACTGTTACCGCCTCTTGACTGGTCCTGGG  
GCTCCAGTTCACCTCTTGCTCCCAACAATCAATTTTCTACAGAACTATCAGAGC  
AATCTTCCTTTCCATCAATCTCAACTCTGTTCAAAACCTTTCCAATAGTTTTTTAT  
GCTTGAGCTAAGAGGTAGCTTCTCCACCCTTTCAGCTTGCCATTGAGGCTG  
CATAATTTAGTCCCAACCCCTTTCGTCAGCAGCTCCTCTCCTGCTAACAGAGAC  
CATTCACTACTTTTCTTTGACTGTACCTTTGCTTTCCACGAGGGCTCTTTCTGGA

ATGATATGTCCATACTACTATTGTTGTTGTTCTTACTTTTAGCTCTTTTTCTGCTT  
AGCCCACTTG TGCCAGGTT CAGTCA CCCCCCTCTCCCTGCCTGGAAGTAACT  
ACTATTCTGGTTATAGTCTACTTAATATCTATATCTATATCTATATATATGCATCCAC  
AGATAATGTGTGATATTGTCTTGAAAAAATATACATAAATGGTATACTTTGTCT  
CCTGCGATTAGTTTTTCACTATCTTTAGTTTTTAAAGATTTATCCCTATTGACATAAA  
TAGCTATAGTCTTTTTCAATTACTGTGTTGCATTTCAATTTATAAATATACCACATAC  
ATTATTCATCCATTCTCTAAAGGTGGGCATTTATGTTGTTTTTCAGGTTTTTGCTAT  
TACAATATTTGTGAATATCCTTAGCAGCTGGTCTCCCTTGTCTTATACAAATTTT  
ACTGACCTTTCAAGATCCTGCTTTTCATCAACTCCTCTGGGAAAGCCTTCCCTG  
AATCCCCCAGCCCACAGCAAGTCTTGGTACATCAAAGTGCTTGTGCATCTTTG  
GGTATCATCACTGCCAAGCACACAGCTCGCAAAGTAAGAGCATAGAAATATTC  
GCTTCACGGATGAACAAATGAATGAATGAATGGGGCCTTCCCACTCCATCGTG  
GCTTATTCCTTTTGCAATGGACTTTGGCGCACCTTGGCCCCACTTTCCTTCTTT  
GACAGCACTGGTCTACTCAGAGCATTCTCCTTTAGCAAAGCAGTGTGTGGAT  
GTGTGGGTGTGGGTGGCGATACAGACCTCTTTGGATGAGGACCGCCTCTCCCC  
TGCAAGTTCACGATCAGCAAACCTCTCAGTGCTTGAAGTTCAGAGTCCTGCCCA  
CCCCTCACCTCCACGCCCTTCTGCACTGGTCAAGCCCAGCGAGCCGCTGCAGC  
CTGATCGAGTTAAGGCTGCTGGAGAAAGGGTGC GGACGGGGGCCAGAGAGA  
GTGGCTCGTAATGGGTCCCTCCGCGCGGAGCTCCGGGCCGGCGCTTCTTCCTG  
CTGAAACCCTGGGTGCTGCCAAAGCGGCAGGGGCCGAGGCCGCGGGCGACT  
GTGGAGGGCAGGGGCTTGC GGTGGGAGGAGGCGGCTGAGGCGGAAGGACAC  
ACGAGGCTGCTTCCTTTGCACACCGAAAGTTTCAAGCCAAACTGGGCGGCGG  
CTGGGGCGGCAGCCGAGGGCGGCAGCTCGGGGGCGCGGGGAGTCAGGCATT  
GCGCCTGTGCTTCGGACCGTAGCGCCAGGCCTGAGCCTTTGAAAGCATGGGA  
GGAGGGAGGAGGTGGGAATCCTCTATCAGGACCCCTCCCATGTGGATCTGCC  
CAGGCAAA **GGCAAAGGCGGCGGGCGGGCGGGCGGGCGGGCGGGCAGCGGGCGG**  
**GGCGGGCGGGCGGCAACTGGCGGCTGGCAACAACGGCAACAGCGGCAGCGGGCG**  
**GCAGCGGGCGGGCGGGCGGGCGGGCGGGCGGGCGGGCGGGCGGGCGGGCGG**  
**GCGGCACGGCGACGCTGGCAACGGCACGGCTGGCTGGCAACGGCGGGCGGCA**  
**GCAGCACGGCTGGCGGGCGGGCGGGCGGGCGGGCGGGCGGGCGGGCGGGCAAGG**

AGGAGGCGGCAGCGGAGGCAGCGGAGGAGGCGGCAGCGGAGGAGGCGGCA  
GCGGAGGGCAGCAGCGGAGGGGAGGCAGCGGCGGAGGAGGCGGC

**F1-IV:15-read 3**

CTGGGATTATGACGCAAAGCGCCCGCCTGGCCTACATTTATTTAATAATGTATGC  
TTCTAGTCGCTTCTAGGTTGCTCTCTTTGGGGATAACTATCTTATATTCTTCTACA  
GATATGTTTTAATAGTGACAAAAGTCTTTACGGTGATTTTAAGAAAATTTGTAT  
GCAGCCAGTACTATATGAATTATCTCTGGTGAGTAAAGAGGAAGATCGAACTG  
GTAACACTGTGGGTAACAAGTGAATAATGTTATCTTTCTCAAGAACATACTTG  
CTGAACAAATTCAAAAAATATTTTGACTCGTTATTTTTGAAAAAGGGTTTCTGA  
CAATATATTTCAAATGCGACTACTTTCCTAATGATGCCCTTTTAAAGTGCTTG  
GTAACATGCGGTTTTGGAATTTCCCTTAGGTCTATGCCCTTGACTTGTGTACTTG  
CTTTTGATGTTGTTTACATTCTAGTTCAACATCTATTATGTGATAGACACTGGGA  
TTAATAGGCTGGCGATTCTTTTACCCATGAGGACCTCAAAGTATTGATTGAGAACA  
CAGAAATACAAAAGGAATCCTGGCCGAAAATAAGTATTATTGTTGGAATAAAG  
CGGCAATGGAAGACAGTGGAGGGACTGTCTGTTAGAGGAATTATTGTGGTGTGTC  
GGCAAGCCTTCTTTGATGAGGATAATTCGTTTAGAAGTTCTGTTAAGGGGAGG  
AGGGAAGGGGACAAGGTCATTGAAGCCAAAGGAATAAAAGATACAGGGACA  
GAAACAACAGCAAGATATGTTTAGGGGGAATCTCAGTGTAATACTGTTATTGTG  
TGAAGTTCACAACAGGGGCAGGGAGATGGGGCCTTAATGTGAAAAGGCCTTG  
TATGTACCATGTTTAAGTTTGAATTTATCTAGGGGAGTCAGGAGAGGAGTTCTA  
TGGTGGATTTCCCATCCAACAGGATTAGCAAAGTCCCCACATCCAATTAGTCCA  
CCTCCTTTTTTTCTGTTTCTTTAACATTGTCTCAGATTCATTCCTTCTGAAATCTA  
CCTTATTAGTTCAGGTCTTCTTAAATTTGTAAGTGGACTGTTCTGTAAGTCTTGGCT  
TTGGTCCCTGGGGCTCCAGTTCACCTCTTGCTCCCAACAATCAGTACAGAGACT  
ATCAGAGCATCTTCCTTTCCGTAATCTCAACTCTGTTTTCAAACTTTCCAATA  
GTTTATGTGACCTAAGAGGTAGCTGCCTCCCCACCCTTTCAACGCATTCAAGG  
CTGCATAATTTAGTCCCAACCCCTTTAGGTCCTTGACTCACTGTAACAGAGAC  
AGAAGTCCCATTTGCCTCTTTTGACTGCTTTCTTTGCTTTTCGAGGGGCTCTTTC  
CTGGAATGATATGTCCATACAAGCTACTGCTGTTGTTCTTACTTTTAGCTCTTTC  
TTAGCCCACTGCCAGGTTTGATCGTCACTACTCACCTGGAAGTAGCCTATTAT

TCCTGGGTTATAGTCTCTTAGCCTTCTATATCTATATCTATATATATATGCATCCCC  
AGATAATGTATTGTCTTGAAAAATATACATAAATGGTATACTTTGTCTCCCTCTAT  
AAGTTAGTTTTTTCCACTGTCATTTAGTTTTAAGATTTATCCTATTGACATAAATA  
GCTATAGTCTTTTCAATTACTGTGTTGCATTTTCATTTTATAAATATACATGCAGTA  
TTCATCCATTCCTCTAGGGTGCTGAGGCGTATGTATTTGTTTTCAAGGGTTTTGC  
TGTACAGTGTTAGCGAATATCCTTAACTAGCTAGTCCTCCTTGTCTTATACAAAT  
TTGCAACTTTCAAGATCTGCTTTCATCAACGCTCTATGGAAAGCCTTCCCTGAA  
TCCCCAGCCCGGCGGCAAGTCTTGGTACTCAAAGTTGCTTATGCATCTTTGGTA  
TCATCCACTACCAAGCACACAGCTGCGCGAAATGTAAAATATTCGCTACGGAT  
GAATTGAAATGAATGAATGAATGGGGCAGCACCCGCCGTGATGGCTCTATTATTC  
CTTTTTAATGGACTTGCGTACTGTCTTTGACAGCTTCTGGTCCTACTCAGAGCA  
TTCCTCTAGCTAACAAAGCAGTGTGTGTGGATGTGTGTGTGCGGTTAGCGGGT  
GGCGTCTGAACCTCACTGGACCGCCTCCTGCAGTTCGATCCCGGCAAACCTCCA  
GTGGCAGAGTTCGAGTCCTACCCCCCTCACCTCCACGCCCCTTCTGCACTGGT  
CAGGCAGCGAGCCGCTGCAGCCCTGATCCAGTTAGGCTGCCTGCTGGAAGGA  
CGGACAGGCCAGTGACTCGTGATCCCTCGCGCGCGCGGAGCTCGGGCCCGGC  
ATATTTCTGCGGGAAACCCCTGGGTGCCTGCCCAAGGCGGCGGCGGGGCCG  
AGGCCGCAACATTGCCAGTAAGGCAGGGGCTTTGCGGTGGGAGGCGGCTGGC  
CTTGGGTTACGAGGGCTGCTAAGCTGCACACGCGAAAGTTTCAGCAGGCGGC  
GGCTGGAGGCGGCGACCGAGGGAGCGGCAGACTCAGGGGCGCAGGGGAGTC  
GAGGGCATTGCGCCTGTGCTGGACCATGGCGCGCAGGACTGGGCAACGCCA  
GGAGGAGGAGAGTGGGGCTCTATCAGGTTATGGATCTGCCA **GGCGGC**  
**GGCGGC**  
**GGCGGC**  
**GGCGGC**  
**GGCGGC**  
**GGCGGC**  
**GGCGGC**  
**GGCGGC**  
**GGCGGC**  
**GGCGGC**

**F1-IV:15-read 4**

AGTTACGTATTGGTTATTTTATCCTATAGGAGTCAGAGAGGTTCTATGGGTAGG

ATTTCCCATCCCAACAGGATTGTAAACTCCACATCCAATTAGTCACACCTCCAT  
TTTTTTTTTTCTGTTTCTTTAACATTGTCTCAGATTCATTCCTTCTGAAATCTACC  
TTATTAGTTCAGGTCTTTCAATTTGTGCCTGGACTGTTACCAATTTGACTGGT  
CCTGGGGCTCCAGTTCACCTCTGCTCCAACAATCAATTTTCTACAGAACCATCA  
GAGCAATCTTCCTTTCCATCAATCTCAACTCTGTCTAAAACTTTCAATAGTTT  
TATGTGACCTAAGAGGTAGAAGCTGCCTCCCACCCTTTCAGCTTGCCATTCAA  
GGCTGCACACTCTGTCCCAACTCTTTCCATTCTTGACCTCTCACTGCCACCAG  
AGACAGAACTCCATTTACTTACTCTTTTGACTGTACCTTTTGCTTTCACGGTGG  
CTCTTCGAATGATATATTCATACTAATATGCTGTTGTTCTTACTTTTACTCTT  
TTCAGCCTCCTAATTTGTACCTATAGGTTTGATCACAATTTTACCTCCTGCCCTA  
GAAGTAACTAATGTTCTGCTATAGTCTCTTAACATTCTATATCTATATCTATATG  
CTAATTCACAGATAATGGTATTGTCTTGAAAAATATACATAAATTTGTATACT  
TTTTAGTTCCTCAAGGACATTAGTTTTTTTTTCATCATCATTTAGTTTTTAAGATT  
TATCCTTATTGACATAAATAGCTATAGTCTTTTTCAATTACGTTGCATTTCAATTC  
CGAGTAAATATACTCCACATTATTCATCCATTCTCTATGTGGCATTATGTTGTT  
TTCAAGTGTTTTTGCTATTACAGTGTTACAAACGAATATCCTTAGCTTAGCTGGT  
CTCTTGTTCTATACAAATTTTACTGACCTTTCAAGATCCTGCTTTCATCCCAGCT  
CCTCTGGGAAAGCTTTCCCTGAATCCCCAGCCCACAGCGCAAAGTTCACTCA  
AAGTTGCTTGTCATCTTTGCATCATCCCACTGCTAAGCACACAGCCACGCC  
AGCAAGGCACTTAAGAAATATCGCCAATGGATGAAATCAAAAATGAATGAATG  
AATGGGCAGCACCACCGTGATGGCTCTATTCCTTTTTAATGGACTTTCATGTT  
TTGGGCTCACTCTTCTCTTGTGACAGCACTGGTCCTACTCCAGCATTCTCTAG  
CTAGCAAAGCAGTGTGTGATGTGTGGGTGTAGGTGGCGACAAGAGACCACTG  
GATGAGAATCGCTCCTCCTGCAAGTTCACGATCCCGCAACTCCAGTGCTTAG  
TTCAGGAGTCCTACCCACCCCTCACCTCCACGCCCTTCTGCACTGGTCAGCT  
AGCGAGCCGCTGCAGCCCTGATCGAGTTAAGGCTGCTGGAGAAGGATGCGGA  
TTTGTGCCGCATTCCGTAGACCTCCGCGGAGCTCGGGCCGGCGCTTCTTCCTG  
CGGGAAACCCTGCGCTCCAAGGCGGCGTGGGGGGCTGAGGCTGCGGGCGAC  
AGTGGGGCGGGGGCCGGTGGTGGGAGGAGGCGGCTGAGGCGGGAAGGGATA  
CACGAGGTTGAAAGCTTGCTGCACACCTGAGAAAGTTTAGCTAAATCTGGCG

GTGGCTGAGGTGGCGCGAGGAGCGGCGGACGGGGCGCGGGGAGTCGAGGTG  
ATGGTGCCAAAGCTGACTGGGGCGCTGTGCCTGGAGCTTGAAGGCAGAGGAG  
AGAGAGAAAGCGGGTTTATCGGGACTTTCTATGGGATTTGCCGCAGG**GGTGTG**  
**GTGGTGGTGGTGTGGTGGTGGTGGTGGTGGCGGTGGTGGTGGCGGTGGTGGT**  
**GGTGGCGGTGGTGGTGGTGGTGGTGGCGGGTGGTGGTGGTGGTGGTGGTGGT**  
**CGGTGGTGGTGGTGGCGGCGGTGGTGGTGGCGGTGGTGGCGGTGGCGTGGTG**  
**GCGGTGGTGGTGCAGTGGCGGTGGTGGTGGTGGTGGTGGTGGTGGTGGTGGT**  
**GGTGGTGGCGGTGGCGGGTGGCGGTGGCGGTGGCGGTGGCGGTGGCGGGCGG**  
**CGGCGGTGGAGGAGGCGGCGGTGGAGGAGGTGGTGGCGGAGGAGGCGGTGG**  
**AGGAGGCGGCGGCGGAGGAGGCGGCGGCGGTGAGGCGGCGGCGGAGGAGG**  
**CGGC**

**F2-II:3-read 1**

CAGTGATTTTTAAAATTGTATGCAGCCAAGTCACCCTCGTTATCTTTAGTGAGT  
AAGGAAGATCGAACTGAAGTAGCTGCTGTGGGTAAGTGAAGAAGCAATGTTA  
TCTTTCTCTGGTATACTTGCACAGACAAATTCAAAAATATTTGACTACGTTATTT  
TGAAAAGGGTTTCCAGTATTTCAATGTGACTACTTTCACATAATGATACTTGCTT  
ACCTAAAGTGCTTGTTAACATGCAGTTTTGGAATTTTCATGATCTGGCTTACATA  
CAACATACTTGCTTAGTGTTGTTTTTACATTCTAGTTCAACATCTATTATGTGATA  
GACTACTGGGGATTAATAGGCTGTGGTCTTTGCCCATGAGGGACCTCAAACTT  
AGTTGAGAACACAGAAATACAAAGAGTCCTGTGTGAAAATAAGTAGTGGTGT  
TAAGATAAAGAAAGCGGCAGTGGAGACGGTGGAGGGACTGTCTGTTGGAGG  
AGGAATTTATTGTGGTGTGGCCAAGCCTTCTTTGGACTGAGGATGAATTATGAT  
TAGAAGTTCATTAAGAGGAGGAGGGAAGGGGACTACAGAGTCATTCCAAGCC  
AAGGAACAAAGATACAGGGACAGAAACAGCAGATATGTTTGGGAGATCTCAA  
GTTAGCCAATACTGTTATTGTGTGAGATTCACAACAGGGGCAGGGAGGACAGG  
AGATGGGGCCCAATGGCGAAAAGGCCTTGTATGTACCATGTTTAGGAACAGAT  
TACATCCTATGAGGTCAGGGAGAGGTTCTATGGGTAGGATTTCCCATCCCAACA  
GTTGTAAACTCCCATCCAATTAGTCACCTCCCATTTTTTCTGTTTCTTTTAAACA  
TCATAATTCATTCCTTCAAATCTACCTTGGCTGATTCAGGTCTTCCAAATTTGTT  
ACTGGACTGTTACCAACTCTTGACTGGTCCTGGGGCTCCAGTTCACCTCTTG

CTCCCAACAATCAATTTTCTGCAAGA ACTATCAGAGCAATCTTCTTTCATCAA  
TCTCAACTCTGTTCAAAACTTTCAATAGTTTTATGTGACCTAAAGAGTGGCACA  
CGCCACCCTTTCAGCTTGCCATTCAAGGCTGCATAATTTGGTCCCAACCCTTT  
CCGTCCTTGACTCCTCACTGCTAACGAGACCAGA ACTCATTACTTACTCTTTT  
GACTGTGCCTTTAGCTTTCGAGGCTCTTTCCTGGATGATGTATCCATACAACTAT  
TGTTGTTGTTCTTACCAGCTCTTTTCTTAGCCCCGCCTTTTAGGTTGGTCTTTTC  
TCCTGCCTGGAAGTAACTACTATTCTGGTTATAGTCTCTTAATATCTATATCTATA  
TCTATATATATGCATCCACAGATAATGTAGTATTGTCCTTGAAAAAAAAACATAA  
ATGGTATGCTTTGTCTCCTCTGCGATTGGTTTTTTTCCTATCATTGGTTTTAAGATT  
TATCCTAATAGCGTAAATAACATAGTCTTTTTCAATTGCGTGATTGTCATTCAA  
AACTTGCAATACTACATATTATTCATCCATTCCTCTAAGGGTGGTATTTATGTTGT  
TTTTCAAGGTTTTACTGTACAATGTTACAACGAATATCCTTAAGCAAGCTGGTC  
TCCTTGCTTATACAAATTTGTCAGCCTTTCAGATCCTGCTTTCTGTTAGCTTC  
TACAGGAAGCCTTCCTGAATCCCCAGCCCACAGCAGCAAAGTCTTGGCCTCA  
GGTGCTTGTGCCTCTTTGGTATAATCCTGTAAACACACAGCTACATAAAGTAAG  
GCACTTAAAATATTCCTTCCACGGATGAACAAATGAATGAATGAATGGGGCAG  
CACCCTCCGTGATGGCTCTATTCCTTTTAAATGGACTTTGGCGCCTTGGCCCCAC  
TTTCTTCTTTGTGCTGGTCCTACTCAGAGCATTCTCTAGCTAGCAAAGCAGT  
GTGTGGATGGTGTAGGTGGCGATACAGACCTCACTGGATGAGGACCGCCTCTC  
CCTGCAAGTTCACGATCGGCAACTCCAGTGCTTGAAGTTCAGGTCTACCCAC  
CCCTCACCTCCACCCCTTCTCTGCACTGGTCAAGCCAGCGAGCCGCTGCAGCC  
TGATCGAGTTAAGGCTGCTGGAAAGGATGCGGACAGGGCCGGTAATCATGTCG  
ATCCTCCGCATGGGCTGGGCGGCGCTTCTTCCTGCAGAAACCCCTGGGTGCC  
CAGGCGGCGGGGCCGAGGCGGCGGACAATGAGCAGGGCTTGCGGTGGGA  
GGAGGCGGCTGAGGCGGAAGGACACACGAGGGGGCTGCTTGCTGCACCCGAG  
AAAGTTTCAGCCAACTTCGGGCGGCGCAGGGCGGCGGCGGCGAGGGCGGCGC  
GGACTCCGGGGCGCGGGGTCAGGGCAGCTGCGCCTGTGCTTCGGACCGTAG  
CGCCAGGGCCTGAGCACAAACGGGAGGGAGGAAGGTGGGGCTCCTCTATCAG  
GACCCACCTCCCATGTGGATCTGCCCA **GGCGGCGGCGGCTTTGGCGGCAGC**  
**GGCGGCGGCGGCGGCGGCGGCGGCAGCGGCGGCGGCGGCGGCGGCGGCGGCAGCGGC**





AAATTTATCCCTATTGACATAAATAGCTATAGTCTTTTCAATTGCTGTGTTGCATT  
TTATTTATAAATATAACCATACATTATTCATCCATTCCTCTAAGGGTGAGCATTATAT  
TTTCAAAGGTTTTTTATATTACAGTGTTACAACGTTATCCTTAGCTTAGCTGGTCT  
CCTTGTCTTACTGAATTTTACTGACCTTTC AAGAGTCTGCTTTCATCCCAGCTC  
CTCTGGAAGCTTCCCTGAATCCCCACAGCCTGACGGCAAAAGTCTTGGTACT  
CAAAGTTGCTTGACCGTCTTTGTTGTCATCCACTGCCAAGCACACAGCTTTCAT  
AAAGTAAGGCACTTAAAATATTCGCTACACGGATGAACAAATGAATGAATAGT  
GAACTGCATTTTTCTCCGTGATGACTCCTATTATTCCTTTAATGGACTTTGGC  
ATGTGGCCCCACTTTCCTTCTTGAGCACTGGTCCCTACTCCAGAGCATTGTTC  
CTCCTAGCTAGCAAAGCAGTGTGTGGATGTGTGTGTGGGGTGTAGGTGGCAAT  
CCTGAACCTCACTGGATGAGGACCGCCTCTCCTGCAAGTTCACGATCTGGCAA  
ACTCCAGTGCTTGAGTTCAGGTCTACCCACCCCTCACCTCCACGCCCTTCT  
GCACAGGTCCAGCAGGCCGCTGCAGCCCCTGATCAGAGTTAAGGCTGCTGGA  
GAAGGATGCGGACAGGGGCCAGTGA CTCTAGTAGATCCCTCCGCGCGGAGC  
TCGGGCCGCGCTTCTTCTGCAGGAAGCCCCTGGGTGCCCAAGGCGGCGGG  
GCCGAGGGCCACTGCAACGACGAGTGGGGCAGGGCTTGCGGTGGGAGGAGG  
CGGCTGAGCGGAAGGACACACGAGGGCTGCTTCGCTGCACACCGAGAAAGT  
TCCGGCTGGAACTTGGGCGGCGGCTGGGCGGCGGCCAAGACGGCGGACTC  
AGGGGCGCAGGGAGTCGAGGCATTTGCGCCTGTGCTTTGGACCCGCCGCGCC  
AGGGCCTGAGCCTTTGAAGCAGGAGGAGAGAGAGTGGGGCTCCTCTTCGGG  
CCCCTCCCATGTGATCTGCCCAAGCGGCGGCGGCTGGCAGCGGCAACTGGC  
AGCGGCGGCGGCAGCGGCAGCAGCAACGGCAACGGCACGGCAGCAGCGGCG  
GCGGCGGCGGCGGCAGCAGCAGCAGCAGCAGCAGCGGCAGCGGCACCGGCA  
ACGGCAGCAACAACGGCAACAACAGCAACGGCAACGGCAGCGGCGGCAGCA  
GCAACAGCAACGGCAGCAGCAGCAGCGGCAGCAGCAGCAGCGGGAGAGGC  
AACGGCGGAGGAGCAACGTGGAGGAGGCGGCGGCGGGAGGAGGCAACAGC  
GGAGGAGGCGGCGGCGGAGGGCGGCGGCGGAGGAGGCGGCGGCGGAGGAG  
GCGGCGGCGGAGGTGGCAGGAGGAAAGCGGCGGCGGAGAGGCGGCGGA  
GGGAGCCGGCGGCGGAGGAGGCGGCGGCGGAGGAACGGCAGCGGAGGAGG  
CGGCGGCGGAGGAGGGCTGACGGCGGAGGGCTGGCAGCGGAGGAGGCGGC

GGCGGAGGAGGCGGCAGCGGAGGAGGCGGCAGCGGAGGAGGCGGCAGCGG  
AGAGCAGCAGCGGAAGGAGGCGCGAGCGGAGGCGGC

**F2-II:3-read 3**

GTTATCTTTAGTAGTGAAGAGGAAGATCGAACTGTGGTAACACTGTGCCCAGG  
TGAAACATGAAAAATAATATTATCTTTTCTCTAAGACATACTTTTGAGACAAAA  
TTCCAAAAAATATTTTGACTACGTTGTTTTGAAAGGGTTCCAAGTATTTTCAAG  
TGACTACTTTCCTATGATACTTGCCCACTAAAAAGTACTTAGCATTAAACATGCA  
GTTTTGGAATTTCCCTTAGATTCTACCCATGCAAGCTTGCCTTGAGTGTTTGTTTT  
CTGGTTCCTTTATCTATTATGTGAAGTGAACACTAAGTTATCGACTGCATGGTCT  
TCCTTGTAGGGACCTCAAAAAGTTAGTTGAACACAGAAATACAAAGAAGTCCT  
GTGAAAAATAAGTAGCCAATTTTAAGATAAAAAAGCGGCAGTAGAAGACAGT  
GGAAGGGACTATCTGTTAGAGGAGAATTTGTTGTGGTGTGCATGCACTTCTTTG  
GACTGAGGATGAATTATGATTAGAAATTCATTAAGAGGAGGAGGAAGGGGACT  
ACAGGGGTCATTTCCAAGCCAAAGACAAAAGATGAGGGACAGAAGCAACAA  
GACAGATATGTTTTGGGGGAATCTCAAGTTAATAATACTGTTGTGTGAAGTTCA  
CAACAGAGCAGGAGGGACAGGAGATGGAGACTAATAAGCGAAAAAGGCCTT  
GTATGTTACCATGTTTAAGTTTAGATTTTATCTATAGGAGTCAGGGAGGGAGTTC  
TATGGGTGGGATTTCCATCCCAACAGGTTGTAAACTCCCACGTCAATTAGTCCA  
CCTCCATTTTTTTCTGTTTTACTTTAACATTGTCTCAGATTTGTTCCAGAATCTAT  
TGGTTCAGACTTTGCTTGGTTTGTGCTGGACTGTTCCACTAACCTCTTGACTGG  
TCCTGGGGCTCCAGTTTACCTCTTGCTCCCAACAATCAATTTTTCTACAGAACT  
ATGAGCATTCTTTGCTTTCCTCAATCTCAACTCTGTTCAAACTTTTCGGACAGA  
TTTTATGTGACCTAAAGAGGTAGCTGCCTCCCACCCTTCAACACCATTCAAGG  
CTGCATAATTTGAATTCTTACTTTCAGTCACCAGCTCCTCTCACTGTAACAGAG  
ACAGAACTCATTACTTACTCTTTGGCCTTTACTTTCAGGGGCTACTCCTGGGA  
ATGAAATATATATTTGACTGACGACTGTGTTCTGCACTAGCTCTGCCGCCACC  
CAGCCACCCAGGTTTGATCACACCCCCTCTCACCCCTGGAAGTAGCTTGCAAC  
CTGGTTATAGTCTCTTAATATCTATCTATATCTCTCCTACTTGATCACAGATGAC  
ATATAAATGTGTCTTGAAAAAATATACATAAATGGTATACTTTGGCTCTCCCTC  
TAGATTAGTTTTCTATCATTGGATTTTTTAAGATTTATCCCTATGACATAAATAA

GCTATAGTCTTTTCCAATTACTATATTTACATTCATTTATAAATATACATACATTAT  
TCATCCATTCTCTAAGGGTGCAGGCATTTATGTTACTTTTCAGGTTTTGCTATTA  
CAGTGTTACAAGATATCCTTAAGCAAGCTGGTCTCTCCTTGTCTTATACAAATTT  
TACTGACATTTCAAGACCACACTTTCAGCCCGGCTCCTGGGGAAAGCCTTCCC  
TAATCCCCAGCCCACAGCCAGCCAGTGCGACCAGGGTTGCTTGCCACATCTGG  
TATCATCCCTACCAAGCACACAGCCTCTTGTAAGTAAGGCACTTAAGAAATAT  
TTCGCTTCACGGATGAACAAATGAATGAATGAATGGGGAATGGCTACTCCGTG  
ATGGCTCTGTTCATACTTGTCTGCAGACTTTGGCGCCTTATTTTCTCCTTCTTTG  
ACCTTTGGTCCTACTCAGAGCATTCCTCTAGCCCTAGCAAAGCAGTGTGTGGA  
TGTGTGGGTGTGGGTGGCAGTGAACCTCACTGGATGAGGACCGCCTCTCCCTG  
CAAGTTCTACAGTCAGCAAACCTCCAGTGCTTGAAGTTCAGAGTCTACCCCACC  
CCCTCCACCTCCACGCCCTTCTGCTGAGTCAACCCAACCCAGCCACTGCAGC  
CTGATCAGTTAGGCTGCTGGAGAAGGATGCCAGACAGGGCCAGTGAATCATG  
TCTAGATCCCTCCACCGACCAGGCCACTTCTTCTACAGGGAAGCTTCGATTT  
TTAAAGCCATGGGGCCGAGGCCACCCGGCGACAGTGGGGGCAGGGCTTGCAAG  
TGGGAGGAGGCGGCTGAGGCGGAAGGACACACGAAGACTTCGCTGCACCGA  
GAAAGTTCAGCCAAACTGGGCGGCAGCTAGAATAGCAGCCGGGGAACTGGCG  
GACTCCGGGACGCAGGGGTCAGGCATTTTGCGCCTGTACCTTTGGACCATGCG  
CCAGGGCCTGGCCTTTAGAAACCAGGAGGAGGGGGAGGGGAGGAAATCGGG  
CTCCTATCGGGACCCCTCCCCATGTGGATCTGCCAGCA**GGCGGCGGCGGGCG**  
**GCGGCGGCGGCGGGCGGGCGGCTTTGACGGCAGCAGCGGCAGCGGCGGCGGGCG**  
**GCGGCGGCTGACCCGGCAACGGCAACGGCAGCAGCGGCGGCGAAAAGCGGC**  
**GGCGGCAACGGCAACACGACGGCGGGCGGCGGCGGCGGCAGCGGCGGCGGGCG**  
**GCGGCGGCGGCAACGGCAGCAGCGGCAACGGCGGCAGCAGCTGCTAACAAAC**  
**CCAACAGCAGCAACAGCGGCGGCGGCGAAGCAGCGGCAGCGGAGGAAGGG**  
**GCGGCAACGGAGGGCGGCGGGCGGAGGAGAGCGGCAGCAGAGGAAGCCTGG**  
**CGGCGGAGGAGGGCGGCGGGCGGAGAGCGGCTGTAGAGAGGCAGCAGCGGAG**  
**GAGGCAGCAGCGGAGGAGAACTGGCATGGCGGCGACGGAGGGCAGCTTGA**  
**CGGAGGAGGCAGCGACGGAAGGCAGCAGCAGAGGAGAGCAGCAGCAGGAG**  
**GTAACGAGGAGGCGAAAGCGGCGGGAAGGCAGGCGGCGGAGGAGGCGGGCGGCG**

AGAGGAGAGCGGCAGCGGAGGCGGCGGCGGAGGAAGGGACGGCAGCCGGA  
GGAGGGCGGCAGCGGAGGAATGGCAACGGCGGAGGAGGCGGCAGCAGAAGA  
GGCGGC

**F2-II:3-read 4**

GTCACACCTCCATTTTTTTTTTCTGTTTCTTTAACATTGTCTCAGATTCATTCT  
TCTGAAATCTACCTTATTAGTTCAGGGTCTTCTTAAATTTCCAGTTTGGACTGTT  
CACTAACTCTGACTGGTCCTAGCTCCAGTTCACCCTCTTGCCCCAACAAATCAAT  
TTTCTACAGAACTATCAGAGCAATCTTCTTTCCCATCAATCTCAACCTGTTCA  
AAAACCTTCAATAGTTTTATGACCTAAGAGGTAGCTGCCTCCCCACCCTTCAG  
CTTGCCATTCAAGGCCGTATAATTTGGTCCCAACCCCTTTCCGTCATTCTTGAC  
TCTCCTCACTGCTAACAGAGACAGAACTCATTTACTTACCTTTGGATCGTACCT  
TTGCTTTCACGTAGGGCTCTTCCCTGGAATGATATGTCCATACTAATTTGTTG  
CTGTTGTTCTTACTTTTAGCCTTTCAGCCACTTGTACCCAGGTTTGATCACAC  
CCCTACCTCCTGCCTCCCAAAGCAATCACTATTCTGGTTATAGTCTCTTAATATC  
TATATCTATATCTATATATATGCATCCACAGATAATGTGTAGTATTGTCTTGAAAA  
ATATACACAAATGGTATACTTCTGTTCTCTCATGTATTAGTTTTTTCATCATT  
TAGTTTTATGATTTATCCTTATTGACATACAAATAGCTATAGTCTTTTTCAATTAC  
TGTGTTGCATTTCAATTTATAAAGGAGTACTATACATTATTCATCCATTCTCTAAG  
GGTGGGTATTTATGTTGTTTTCAAGGTTTTGCTATTACAGTGTTACAAATTTAAT  
ATCCTTAGCTTAGCTGGTCTCCTGTCTTATGTTAAATTTTGCATTGACCTTTCAA  
GATCCTGCTTTCATCCCAGCTCCTCTGGGAAAGCCTTCCCTGAATCCCCAGCC  
CACAGCGCAAAGTCTTTGGTACTAAAGTTGCTTGTGCATCTTTGGTATCATCCC  
ACTGCTGCCAACACAGCCACGCAGTAAGGCACTTAAGAAATATTCGCCACACG  
GATGAACAAATGAATGAATGAATGGGGTGCACCACCGTGATGGCTCTATTCT  
TTTTAATGGACTTATGCCTTGGCCACTTCTTCTTTGACAGCACTGTCCTACCC  
AGAGCATTCTCTAGCTAGCAAAGCAGTGTGTGGATGTGTGGGTGTAGGTGGC  
GATACAGACTCACTGGATATGAGGGACCGCCTCTCCCGGTAAGTTCACGATCC  
CGGCAACCCAGTGCTTGAAGTCTAGAGTCCTATCTTCACCTCACCTCCACGCC  
ACCTTCTGCACTGGCTGGGTTAGGTGAGCCGCTGCAGCCCTGATCGAGTTAAG  
GCTGCTGGAGAAGGGATGCGGATTGCAGCCAGTGACTCGTAGTAGATCCCTCC





CGGCGGCGGTGGCGGGTGGCGGTGGCGGTGGCGGCGGTGGCGGGCGGTGGC  
GGCGGTGGTGGCGGCGGCGGCGGCGGCGGTGGCGGTGGCGGTGGCGGTGGC  
GGTGGTGGCGGCGGGAGGAGGTGGCGGCGGGAGGAGGCGGGCGTGGCGGAG  
GGGAGGGTGGCGGCGGAGGGAGGTGGCGGCGGAGGTGGCGGTGGAGGGAG  
GGTGGCGGCGGGAGGAGGCGGCGGCGGAGGAGGCGGCGGGTGGAGGAGGC  
GGCGGCGGAGGGAGGGCGGCGGCGGAGGAGGCGGCGGCGGAGGAGGCGGT  
GGCGGAGGAGGCGGCGGCGGAGGAGGCGGCGGTGGAGGAGGCGGCGGCGG  
AGGAGGCGGCGGCGGAGGAGGCGGCGGCGGAGGAGGCGGTGGCGGCGGAG  
GAGGCGGCGGTGGAGGAGGTGGCGGCGGAGGAGGCGGCGGCGGAGGAAGG  
AGGAGGCGGCGGGCGGAGGAGGCGGC

**F4-II:2-read 1**

GTGGTGTCTGGGCAAAGCCCTCTCTTTGACTGGAAGGGATGAATTATGATTTTTC  
AGGAAGTTCATTAAGAGGAGGAGGAAGGGGACTACAGGAGTCATTCCAAGCC  
AAAGGAACAAAAGATACAGGACAGAAACAGCAAGATATGTTTGGGGGGAA  
CTCAAGTTAGCTAATACTGTTATTAAGAAAGTCTACAACAGGGGCAGGGAG  
GACAGGAGATGGGGCCCAATGACTAAAGCGGCCTTGTATGTACCATGTTTAGA  
AGTTTGAATTTTATCCTATAGAGTCAGAGAGGTTTCATGGGTGGATTTCCCATCC  
CAACAGGATTGTAAACTCCACATCCAATTAGTCACACCTCCATTTTTTTTTTC  
TGTTTCTTAACATTGTCTCAGATTCATTCCCTTCTGAAATCTACCTTATTAGTTC  
AGGTCTTCTTAAATTTGTGCCTGGACTGTTCACTCAACTCTTGACTGGTCCTAA  
ATCTAGTTCACCCCTTGCTCCCAACAATCAATTTTCTACAGAACTATCAGAGCA  
ATCTTCCCTTTCATCAATCTCAACTCTGTCTAAAAAACTTTCAATAGTTTTATG  
TGACTTAAGAGGTAGCTGCCTCCCCACCCTTTCAGCTTCTTGCCATTCAAGGC  
CGTGAAGCAATTTGGTCCCAACCCCTTCTTCCGGCCCTTGACTCTCTCACTGCT  
AACAGAGACAGAACTCATATTTACTTACTCTTTTGACTTTCCGTACCTTTGCTT  
TCACGAGGCCCTTCTTGGAAATGATATGTCCATAACAACCATTTGTTGTTGTTCTTA  
CTTTAGCTCTTTTCTTAGCCCACTTGTACCCAGGTCGCGATCACACCCCTACTC  
TCCTGCTCTGAAGTAACTACTATTCTGGCGATAGTCTCAATATCTATATCTATATC  
TATATATGCATCCACAGATAATGTGTAGTATTGTCTTGAAAAAATATACATAAA  
TGGTATACTTGTCTCCCTTACATTAGTTTTTTTTCATCACTATCATTTGTTTTTA



AGATTTATCCTTATTGACATAAATAGCTATAGTCTTTTTCAATTACTGTGTGTTGC  
ATTTCATTTTATAAATATACTATACTATTATTCATCCATTCCCTCTCATATAAGTGGGC  
ATTTATGTTGTTTTCAAGGTTTTGCTAGCTACAGTAAGTTACAATAATATCCTT  
AGCTTAGCTGGTCTCCTTTTTGTCTTATACAAATTTTACTGACCTTCAAGATCCTG  
CTTTCAGTCCTGGCTCCTCTGGAAAGCCTTCCCCTGAATCCCCCAGCCCACAA  
AGTTCAGTACCAAAGTTGCTTGTGCATCTGGTATCATCCCACCGCGTTGCCATT  
AATAGCCACGCAAAGTAAGGCATTTAAGAAATATTCTCACATGGATGAACAAA  
TGAATGAATGAATGGGGGCAGCACCACCCGTGATGAAGCTCTATTCCCTTTTTA  
ATGGACTTTATGCCTTGGCCCACTTTCCTCTTTGACAGCACTGGTCCTACTCAG  
GAGCATTCTCTCTAGCTAGCAAAGCAGTGTGTGGATGTGTGTGTAGGTGGCGA  
TACAGACCACTGGATGAGGACCGCCTCCCCTGCAAGTTCACGATCCTGGCAAC  
CCAGTGCTTCAGTTCAGAGTCCTACCCACCCCCCACCTCCACGCCCTTCTG  
CACCGGTCGCTTGC GGAGCCGCTGCAGCCTCTGATCGAGTTAAGGCTGCTGAG  
AAGGATGCGGACGGCCAGTGA CTG TAGCAGATCCCTCCGCGCGGAGCTCAC  
GGCGCTCTTTCCTGCGGGGAAACCCCTGGGTGCCCAAGGGCGGCGGCTGAGG  
CCGCGGCGACAGTGGGCGGGGCTTGC GGTGGGAGGAGGCGGCTGAGGCGGA  
AGGACACACGAGGCTGCTTCGCTGCACACCTGAGAAAGTCAGAAACTGGCG  
GCGGCGAGGTGGCGTGCCGGTGGAGCGTGGACTTTGTGCGGGGGAGTCGAG  
GTATTTGCCCTGTGCTTTCGGGAAGTGCTGTGGCTTGAGCTTGAAGCAGGAGGA  
GGGGAGGAGGGTTTTCTATCGGGACCCCTATGTGGATCGCCCA GGTGGTGGTG  
CGGTGGCGGTGGTGGCGGCGGTGGCGGCGGCGGGTGGTGGCGGGTGGTGGT  
GGTGGTGGTGGTGGTGGTGGTGGTGGTGGTGGTGGTGGTGGTGGTGGTGGT  
GTGGTGGTGGCGGTGGTGGTGTGTGGTGGGTGGTGGTGGTGGTGGTGGTGGT  
GGTGGTGGTGGTGGTGGTGGCGGGTGGCGGTGGTGGTGGTGGCAGGCGGGTG  
TGGTGGTGGTGTGGTGGCGGTGGTGGTGGCGGGGCGGTGGCGGTGGCGGTGGC  
GGTGGTAGTGGCGGCGGCGGCGGGTGGCGGTGGCGGCGGGCGGCGGCGGCG  
GC

**F4-II:2-read 2**

GGGCAGATTCTATCCCAACAGGATTGTAAACTCCACATCCACCCTAGTCACA  
CCTCCATTTTTTTCTGTTTCTTTAACATTGTCTCAGATTCATTCCTTCTGAAATCT

ACCTTATTAGTTCAGGTCTTTAAATTTGTGCCTGACTGTTACCAACTTGACTG  
GTCCTTGGGGCTCCAAAGTTCACCTCTGTTGCTCCCCAACAATCAACTCTTTCT  
ACAGAACTATCAGAGCAATCTTCTCCTTCCAGCATCAATCTCAACTCTGTTTCA  
AACTTTCATTAGTTTTATGTGACCTAAGAGGTAGCTGCCTCACCCCTTTCAGCT  
TCGCTATCCAAGGTTGCATAATTTGGTCCCCAACCCCTTCCGCCCTTGACTCCT  
CACTGCTAACAGAGACAGAACTCATTACTTACTCTTTGACTGTACCTTTGTTT  
ACGAGGCTCTTTTCCTGAATGATATGTCCATACTAATTTGTTGTTGTTCTTACT  
TTAGCCTTTTCTGAAATTACTTGTACCCAGGTTTGATCACACCCCTACCTCCT  
GCTCCTGGAAGTAACTACTATTCTGGTTATAGTTCTTACTATCTATATCTATATCT  
ATATATGCATCCACAGATAATGTGTAGTATTGTCTTGAAAAATATACATAAATG  
GTATACTTTATTCCCTCTGTATTAGTTTTTTCACTATCATTAGTTTTTAAAGATTT  
ATCCCTATTGGATATAAATAGCTATAGTCTTTTCAATTACTGTGTTGCATTTCAAT  
TCATAAATATACCATAACATTATTCATCCATCCTCTAAGGGTGGGCATTTATGTTG  
TTTTCTAAGGTTTTGCTATTACAGTTACAATAATGTTCCCTTAGCTTAGCTGGTC  
TCCTTGTCTTATACAAATTTTACTGACCTTTCAAGATCCTGCTTTCATCCCAGCT  
CCTCTGGGAAAGCCTTCCTGAATCCCAGCCCACAGCGGCAGTAAAAGTCTTG  
GTACTGTGCTGCTTGCATCTTTTGGTATCATCCTAATGTTAAGCAATACGCTACG  
CAAAGTAAGCGTTAATTTAAGAAATATTCACACATCGGATGAACAAATGAAGA  
ATGAATGGGGGCAGCACCACCCGTGATGGCTCTATCTTTTAATGACTTTATGCC  
TTGGCCCACTTTCCTTTTGACAGTACTGTCCTACTCCAGAGTATCTCTAGCTAG  
CAAAGCAGTGTGTGTGGATGTGTGGGTGAGGTATATACAGACCTCATTACGAG  
GACCGCCTCCCTGTAAGTTCACGATCCCGGCAACCCAGTGCTTGAAGTTCAGA  
GTCCACCCACCCCTCACCTCCACGCCCTTCTGTACCATCAAGCAGAGCCGCT  
GCAGCCCTGATCGAGTTAAGGCTGCTGGAGAAGGATGCGGACGGGCCAGTGA  
CTGTAGTAGATCCCTCTGCGCGGAGCTCGCCGCGCTTCTTCCCGCAGGGAAA  
CCCCTTGGTGCCCAAGGTAAGGGGCTGGAGCGTGGCGACAGGGAAGGGGCTT  
GCGGTGGGAGGAGGCGGCTGGAGGCGGAAGGACATGAGGTTGCCGCTGCAC  
CCGAGAAAGTTTCAGCCAACTTCGGGCGGTGGTTGAGGCGGCGGGCCGAGG  
AGTGCGACTTCGGGGCGCGGGAGTCGAGGATGGTGCCTGTGGGCTGGACTGT  
AGCGCCAGGGCCTGGAGCTTTTGAAGCAGGAGGAGGGGAGGAGAGAGGGTT

TCTATCGGGACCCTTCCCTATGGATTCGTTTCA **GGTGGCGGCGGTGGCGGTGC**  
**GGTGGTGGCGGTGGTGGTGGTGGCGGTGGTGGTGGCGGCGGCGGTGGTGGCG**  
**GTGGTGGCGGTGGTGGCGGCGGTGGTGGTGGCGGCGGCGGTGCGGCGGCG**  
**GCGGTGGCGGCGGCGGTGGTGGTGGCGGTGTGGCGGGTGGCGGTGGCGGCG**  
**GTGGTGGTGGTGGCGGGCGGTGGCGGCGGCGGCGGCGGCGGTATGGTGGCGC**  
**GGCGGCGGCGGCGGTGGCGGCGGCGGCGGCGGGTGGTAAGTGCGCGC**  
**GGTGGCGCGGCGGCGGCGGCGGCGGCGGCGGCGGCGGCAGGCGGCGGC**

**F4-II:2-read 3**

GACTACAGGGGTGTTCCAACCAAAGAGACAAAGATGCAAGACAGAAACAAC  
CAGTTATGTTTGGGAATCTCAGTTAGCTGATACTGTTGTTGACAGTTAAACAG  
GGCAAGGAGGACAGGAGATGGGCCCAATGAAACCTTATATATGCCATGTTTA  
GAAGTTTAGATTTTATCCTGTAGAGGTCGAGGGAGAGGGTTGTGGTTCCCACA  
TCCCAACAGGTTATAAGCTCCACGTCAATTGATCACACCTCCATTTTTTTCTATT  
TCTTAACATTGCTCCTCAGATTCATTCCTTCTAAAATCCCTACCTTATTAGTTCA  
GATCTTCTTAAATTTATTGCCTGGACTGTTACCCAACCTTCAGCTGGTCCCT  
GGGGGCTCCAGTTCCTGCCTCCCCAACAATCAATTTCTACAGAACTATCAGA  
GCAAATCTTCCACTCCATCAATCTCAACTCTGTTCAAAAACCTTTCCAATGGTTT  
ATACTTGACCTAAGAGTGGCTACCTCCCACCTTTCAGCTTTGCCATTCAAGGCT  
GCATAATTTTGGTCCCAACCCCTTTCGTCACCTTGACTCCTCCTGCTAACAGAG  
ACAGAACTCATTTGCCTCTTTTGAGCTGTACCTTTGCTTTCTGGGGCTCTTTC  
CTGGAATGATCATGTCCTTCAACTATTTATTTGTTGTTCTTACTTTTTAGCTCTTT  
TCTTGGCTGCTTGCTGATTTTAATCACCCCTCTCCTGCCCTGGGAGTAACTGC  
TATTCTAGTTATAGTCTCTTTTAATATCTATATCTATATATAGCCGTCCAC  
AGATAATGTGTAGTATTATCTTGAAAAAATATACATAAATACTTGTATACTTTGT  
CTCCCTCTAGATTAGTTTTTTCCATATCATTTTGTAGTTTTTTAAGATTTATCCTAT  
TATTGACATGAAATAGCTATAGTCTTTTTCAATTCTGTGTGCATTTTATTTATAA  
ATATACACAGCATTATTCATCCATTCCTCTAAGGGGTGAGGCATTTATGTTATTT  
CAAAGTTTTGCTGACTTACAGTGTTACAAAATATCTTCCAACAACCTGGTCTCC  
TTGTCTTATGCAAATTTTACTGTTATACCAAAGGATCCTGCTTTCATCCAAGCTC  
CTCTAGGAAAGTAACCCTAAGATCCCCCAATAATGACAAGTCTTAGTATAAAGT

TGGCAGCCATCTTTAGTATCCATCACTACCAAACACAGCTACACCAAATGAGC  
ACTTAAGAAATATTCACTACAGATGAACAAATAGATGAATAGATGGGGCAGCA  
CCATCCGTGATAAATATTCCTTTTTAATGGACTTTGGCGCCTTGGCCCTTTCATG  
TGACAGCACTGGTCCTACTCAGACATTCCTCTAGCTAACAAATGGTGGCCAAC  
TGGATGTGTGGGTGTAGTGGCGTCTGAACCTCACTGGATGAGGACCATAACCTC  
TCCTGCAAGTTCACGATCCAGCAGCTCAGTGGCCGGGATTCAGAGTCCTGCC  
CACCTGCCTCCACGCCCTTCTGCACTGGTCAAGCCCAGCAGGCCACTGCA  
GCCTGATCGAGTTAAGGCTGTACTGGAAAGGATGCGGACAGGGCCAGTGACT  
CGTAGTAGATCCTCACTTTGGAGCTCAGGCAGCCTTCTTCCTGCAGGGAAACC  
CCTGGGTGCCCAAGGAGGCAGCGGGGCCGGGCCACGCAACGACAATCAGGA  
AGACAGGGGCTTGCAGTGGGAGGGAGGCGGCTGGGGCGGGGAAGGGACTACA  
CGGGCTGCTTCGCTGCACACCGAGAGAGATTTAGCCAAACTTCCGGGCGGC  
AGCTGGGGCAGCAGCCGAGGCCGGCACAGACTCAGGGCATGAGGAGTCAAG  
GGCATTGCCTGGCTGGTTCCTCCGCCATGGCGCAGGGCCTGAGCCTTTGAAGTAG  
GGAGGAGGAGATGGGGCTCCTCTATCAGGACCCACCATGTGGATCTGCCAG  
GCGGCGGCGGCGGCGGCGGCAGCAGCGGCAGCAGCGGCGGCTGGCGGCGGCGGC  
AGCGGCGGCGGCTAACGGCAACAGCACCCAGCAACAACGGGCGGCGGCGGCGG  
CGGCAGCAGCAGCAGCAGCAGCAGCGAGCAGCAGCAACGGCAGCAACAGCAGCA  
GCAGCAGCGGCGGCAGCAGCAACAGCAACAGCAGCAACAGCAACAACAGCA  
ACCGGCAACAGCAACAGCAACAACAACAGCAACAGCAGCAGCAGCAGCAAG  
CAGCAGCAGCAGCGGCAGCAGCGGCGGCAGCAGCAGCAGCAGCAGCAGCAGCAG  
CAGCAGCAGCTTGTGGCAGCAGCGGCGGCGGCAGCAGCAGCAGCAGCAGCA  
GCAGCAGCAGCAGCAGCAGCAGCAGCGGC

**F4-II:2-read 4**

GAAGACAGTGGAGGACTATATATTAGAGGAGAATTTATTGTGGTGTGACTGAC  
CTTCTCTTTGGACTGAGAAAAATTGAATTATGATTAAGTTCATTAGAGGAGGAG  
GGAAGGGGACTACAGAGTCATTCAGCCAAAGACAAAAGATACAGGGACAG  
AAACAGCAAGATATGTTTGGGGGAATCTCAGGATTGGCAATACTACATTATTGT  
GAAGTTCACAACAGGGGCAGGAGGACGGAGATGCAGAATCTCAGTTCTATGG  
GTGAAGTTTCCATCCCAACAGGATGTAAACTCCCATCCAATTAGTCACCTCATT

TTTTTCTGTTTCTTTAACATTGTCTAGATTCATTCCTTCCCAAATCTGTAATAGT  
TCAGGTCTTCTTAAAATTTTGCCTGGACATTCACCAACTCTTGACGCCTGATTT  
TCCAAGACCAGTTGCTCTTGCTCCCAGCAATCAATTTTCTACAGA ACTATCAGA  
GCAATCTTCTTTATCAAGTCTCAACTCTGTTCAACTTTCAATAGTTTTATGTGAC  
CTAAGTGGCTGCCTCCCCACCCTTTCACGCTTTGCAATTCAAGGCTGCATGA  
ATTTGATTATTGCCTAGGTCCTTGACTCCTCTCACTGCTAACAGAGACAGAAGC  
TCATTTGCCTCTTGACTGTTACCTTTTTGCTTTCCACGAGGCTCTTTCCTGGAAT  
GATATGTCCATAACAAGCATTATTTATTTCTTGCTGCTCTTTTCTTATTTTTGTAC  
CCAGGTTTGATCCACCCCCTACTCTACATGGAGTAACACTATTCTGGTTATAGT  
CTCTTATTTATCATATCATATCTATATATATACATCCACAGATAATGTAGTATTAT  
CTTGAAAAAAAATATACATAAATGGTATCTTGTCTCACTATAGATTAGTTTTTAC  
TTCTATAAATTTAGTTTTAAGATTTGTCTAATACAGAGCATAAATAGCTATAGTCT  
TTCTCAATTACTGTGTTGCATTCATTTATAATATAACCATACATTGTTAATGCATTC  
CTCTAGAGGTGGGGCATTATGTTGTTTTCAAGTTTTGCTATTACAGTGTTACA  
ACGAATATCCCTTATAAATAGCTGGTCTCCTTGTCTTATACAAATTTTACCCCGA  
CTTTCGAGATCCTGCTTTCATCCCAGCTCCTCTGGGGAAAGCCTTCCCTAGATC  
CCTGACTGGCAGCAAAGTCTCCTCAAAAATTTGCTTGCATGCATCTTTGGTATC  
ATCCACTATAATACAGCTGCATAAAGTGAGCCACTTAGAAATATTCTTCCACGG  
ATGAACAAATGAATAGATGAATGGGCCAGCACCCTCCGTGATGGCTCTATTC  
CTTTTTAATGGACTTTGGCGCCTTGGCCCACTTTCCTTCTTTGACA ACTGGTCC  
TACTCCAGGCATTCTCTAGCTAGCAAAGCAGTGTGGATGTGTGTGGGTGTGG  
GTGGCGATACGAACCTCACTGGATGAGGGACCGCCTCCTGCAGGTTACGATC  
CCAAACTCCAGTGCTTGAAGTTCAGGGTCCTACCCACCCCTCTCCGCCCTT  
CTACTTTGTGGTCAAGCCAGCAGGCCGCTGCAGCCCTGATCGAGTTAAGGCTG  
CTGGAGAAGGATGTTGGACAGGGCAATGACTCGTAGTAGATCCCTCGCGCGG  
GCTCGGGCCGGCGCTTCTTCTGCAGGAAACCCCTGGGTGCCCAAGGCAGG  
GGCCGAGGGCCACTTGACGACAGTGGGAAGACAGGCTTACCTGCAGTGGGA  
GGGAGGCGGCTGAGCTGAAGGACACACAGGAAAGCTGCTTCGCTACACTGA  
GAAAGTTTCAGCCAACTTCGGGCGGCGGCTGGGGCGGCAGCCGAAGACGG  
CGGACTCAGGGCGCAGGGGAGTCGAGGCATTGCGCCTGTCGCTTCGGACCGT

AGCGCGGGGCTGGGCGCTGGAAGGCAGGAGGAGGAGAGAGTGGGGCTCCT  
TATCGGGACCCCTCCCCGTGGATCTGCCCA**GGCGGGCGGCGGGCGGGCGGC**  
**GGCGGGCGGCGGCAGCGGGCGGCGGGCGGGCGGGCGGGCGGCAGCGGGCGGC**  
**GGCGGGCAGCGGCAACGGCAGCAGCTGGCCCCGGCAGCGGCAGCGGGCGGGCGGC**  
**GGCGGGCAGCGGTGGCTGGCGGTGGTGGCGCGGGCGGCCCGCAACGGCAACG**  
**GCGGCAGCGAAGGCGGGCGGGCAGCAGCGGGCGGGCGGGCGGGCGGGCGGCA**  
**ACGGCAGCAGCGGGCGGCAGCGGGCGGGCGGGCGGCTGCGGGCGGGCGGGCGGGCG**  
**GCAACGACAGCAGCGGGCGGGCGGGCAACGGCAGCGGGCGGGCGGCAGCGGCA**  
**GCGGCAACGGCAGCAACAGCAACAGCAGCAGCAGCAGCGGCAGCGGCAGCG**  
**GCAGCGGCAGCGGGCGGGCGGCAGCGGGCGGGCGGC**

**F4-II:2-read 5**

GAGTCAGGGAGAGGGTCTATGGGTTGCAGTTCCCATCCCAACAGGATTATAC  
AAGCTCCACATCAATTAGTCCACCTCCATTTTTTTTTTCTGTTTCTTAAACATT  
GTCTCAGATTCATTCAACTTCTAAATCTACCTATTAGTTCAAGTCTTCTTAAAT  
TTGTACTGGACTGTTACCAACTCTTGACTGGTCTGGGGCTCCAGTTCACCTC  
TTGTAACAATCAATTTTCTACAGAACTATCAGGTAGTCTTTGCTTTCCATCAATC  
TCAGCTCTGTTCAAAAACCTTTCCAATAGTTTATGTGACCTAAGAGGTAGCTGCC  
TCCCCACTTACTTTCAGCTTGCCATTCAAAGGCTTGCATAATTTGTGATCCCAC  
AACCCCTTTTCCGTCCTTGACTCCTCTCCTGCTAACAGAGACAGAACTCATTTT  
ACTTACTCTTTTGACTGTACCTTTGCTTTCCCGAGGCTCTTTCCTGGAATGATAT  
GTCCAAAAGCCCCCAACTGTATTGTTATTTCTTACTTTAGCTCTTTTCTTAGCCC  
ACTTGTACCCAGGGTTTGATCCACCCCTACTCTCCTGCCTGGGAGTAACTACTA  
TTCTGGTTATAGTCTCTTAGCCTCTATATCTATGTCTATATGTGCATCCACAGATA  
ATGTGTAGTATTGTCTTGAAAAAATATACATAAATGGTATGCTGTCTCCTAGAT  
TAGTTTTTCACTATCATTTTGGTTTTTAAGATTTATCCTATTGACATAAATAAGCT  
ATAGTCTTTTCAATTACTGTGTTGCATTTTCAATTTACTAAATATAACCATACATTAT  
TCATCCATTCCCTAAGGGTGGGCGTTGCAGCAACATTTTCAAGGTTTTTACTA  
TTACAGTGTGTGAATATCCTTAAAAACAGCTTTTGAGTCTCCTTGTCTTATACA  
AATTTGCCCCAGCCTTTCGAATCCTGCTTTCATCCCAACTCCTCTGGAGAAGCG  
CTTCTGGTCCCCCAGCCACAATGACAAAATCTTGGTACTCCAAAAGTGTAT



GAGTCATTCTGAAGCCAAAGGAACAAAAGATACAGGGACAGAAATAGCAAGA  
TGTTTGGGGGAATCTCGTTACTACTGTTATTGTGTGAAGTTCACAACAGGGGTA  
TAGGGAGGACAGGATGGGGTCCAATGACTAAAAGGTCTTGTATGTACCATGTT  
TAGAAGTTTGAATTTTATCCTATAGGGAGCTAGGAGAGGTTCTATGGGTAGGAT  
TTCCATCCCAACAGGATTGTAAACCCACATCCAATTAGTTTCACCTCCATTTT  
TTTTCTGTTTCTTTAACATTGTCTCAGATTCATTCCCTTCTGAAATCTACCTTAC  
GAATTCAGGGTCTTCTTAAATTTGTGCCTGGACTTCACTAACTCTTGACTGGTC  
CTGGGGGGCTCCAGTTCACCTCTTGCTCCCAACAATCAATTTTCACAGA ACTAT  
CAGAGCAATCTTCCCTCCATCAATCTCAACTCTGTTCAAATCTCAATAGTTTT  
ATGTGACCTAAGAGGTAGCTGCCTCCCACCCTTTCAGCTCTGCCATTCAAGGC  
TGCATAATTTGGTCCCACCCCTTCCGGCCCTGACTCACTGCTAATAGAGACAGA  
ACTTCATTTACTTACTCTTTTGACTGTACCTTTGCTTTTACTTAGGGCTCTTCCT  
GGAATGATATGTCCATACAACTATTGTTACATTTTACTTTAGCTCTTTTCTTAGCT  
CATTTGTACCCAGGTTTGATCACAATTCCCCCTACTCTCCTGCTCCTGAAGTAA  
CTACATTATTCTTATTATAGCTTTTAGTTATTATATTAGGTTATAGGTGTACCATGG  
AGCATGTGTAGTATTGTCTTGAAAAAATATACATAAATGGTATACTTTTGTCTC  
CCTCACATTAGTTTTTTCTTACTATCATTTAGTTTTTTAAGATTTATCCCCATTGG  
AGTGTAATAGCTATAGTCTTTTCAATTACTGTGTTGTACTTCCTCATTTTTATAA  
ATATAACATACATTATTATCCATTCCTCTAAGGGTGGGCATTTATGTTGTTTCTCA  
AGGTTTTGCTATTACAGTGTGTTACAACGACATCCTTAGCTTAGCTGGTCTCCT  
TGCTTATACAAATTTTACTGACCTTTCAAGATCCTGCTTATCCCAGCCCTCTGG  
AAAGCCTTCCCTGAATCCCCCAGCCCACAGCGCCAGCGGGTAAAGTCTGGTA  
CTCTGTGCTGCTTGTGCATCTTTGGTATCATCCCACTGCTAAGCACACACAGCT  
ACGCAAAGTAAGGCACTTAAGAAAATATTCGCTACACGGATGAACAAATGAAT  
GAATGAATGAAGCAGTACCACTCCGTGATGGCTCTATCTTTAATGGACTTTGGC  
GCCTTTGGCCCACTTTCTCCTTCTTGACAGCACTGGTCCTACTCCAGAGCATTC  
CTCTAGCTAGCAAAGCAGTGTGTGGATGTGTGGGTGTAGGGTGGCGATACAG  
ACCTCACTTCGGATGAGGACCGCCTCCCTGCAAGTTCACGATCCCGGCAACTC  
CAGCGCTTGAAGTTCAGGAGGTTCCACCCCCACCCCTCACCCACGCCCCCTC  
TGCACTGGTCAAGCCATGAGCCGCTGCAGGCCCTGATCGAGTTAAGGCTGCT



GGAGAAGGATGCGGACGGGGCCGCGACTTCGTAGTAGATCCCTTCCGCGCGA  
GCTCGGGCCGGCGCTCTTCCCGTGGAAACCCCTGGGTGCCCAAGGCGGCGTG  
CCGAGGCTGCGGTGGCGACAGTGGGGCGGGGCTTGCGGTGGGAGGAGGTGG  
CTGAGGCGAAGGACACACGAGGTTGCTTCGCTGCACACCTGAGAAAGTTTCA  
GCCAAACTTGGGCGGTGGTGGCGGCTGAGGCGGCGGCTGAGGAGCGGCGGG  
ACTCAAGGGGGAGTCGAGGTATTTGCGCCTCGTGCTTCGGACCGTAGCGCTAG  
GCCTGAGCCTTTGAAGCAGGAGGGAGGGGAGGAGAGAGTGGGGCTCTCTATC  
GGGACTTTCTCATGTGGATTCGCCCA**GGTGGCGGTGGCGGGTGGGCGGCGGC**  
**GGTGGCGGCGGCGGGTGGTGGCGGTGAAAAGTGGCGGCGGCGGCGGTGGCG**  
**TGGCGGCGGCGGCGGCGGGTGGCGGCGGCGGCGGCGGCGGCGGTGGTGG**  
**CGGCGGTGGCGGTGGCGGCGGCGGTGGTGGCGGTGGCGGCGGGCGGTGGCG**  
**GTGGCGGCGGCGGCGGTGGCGGCGGGCGGCGGCAGTGGTGGCGGCGGTGGC**  
**GGTGGCGGTGGCGGCGGCGGTGGCGGCGGCGGCGGCGGCGGCGGCGGTGGT**  
**GGCGGCGGCGGCGGCGGCGGCGGCGGCGGCGGCGGCGGTGGCGGCGGCGGCGG**  
**GGGTGGCGGC**

**F5-II:1-read 1**

GGCAGGTCTATGCCTATACTGACTTGTACTTGCTTAGTGTTGTTTACATTCTAGT  
TCAACATCTATTGCGGATAGGACACTCGGGGGATTAATAGGCTGTGGTCTCTTG  
CCCACAGAGACCCCGTTAAACTTAGTTGAGAAACACAGGAAACAAAGAGTC  
CTGTGTGAAAAATAAGTATTGGTGTTAAGATGCAGTGAAGACAGTGGAGGGA  
CTGTCTGTTAGAGGAGGAATTTATTGTGGTGTGCGCAAAGCTCTTGGATTGAA  
GGATGAATTATGATTAGAAGTTCATTACAGAGGAGGAGGGAAGGGGACTACAG  
GAGTCATTCTGAAGCCAAAGGAACAAAAGATACAGGGACAGAAATAGCAAGA  
TGTTTGGGGGAATCTCGTTACTACTGTTATTGTGTGAAGTTCACAACAGGGGTA  
TAGGGAGGACAGGATGGGGTCCAATGACTAAAAGGTCTTGTATGTACCATGTT  
TAGAAGTTTGAATTTTATCCTATAGGGAGCTAGGAGAGGTTCTATGGGTAGGAT  
TTCCATCCCAACAGGATTGTAAACCCACATCCAATTAGTTTCACCTCCATTTT  
TTTTTCTGTTTCTTTAACATTGTCTCAGATTCATTCCTTCTGAAATCTACCTTAC  
GAATTCAGGGTCTTCTTAAATTTGTGCCTGGACTTCACTAACTCTTGACTGGTC  
CTGGGGGGCTCCAGTTCACCTCTTGCTCCCAACAATCAATTTTCACAGAACTAT

CAGAGCAATCTTCCTTCCATCAATCTCAACTCTGTTCAAATCTCAATAGTTTT  
ATGTGACCTAAGAGGTAGCTGCCTCCCACCCTTTCAGCTCTGCCATTCAAGGC  
TGCATAATTTGGTCCCACCCTTCCGGCCCTGACTCACTGCTAATAGAGACAGA  
ACTTCATTTACTTACTCTTTTGACTGTACCTTTGCTTTTACTTAGGGCTCTTCCT  
GGAATGATATGTCCATACTAATTGTTACATTTTACTTTAGCTCTTTTCTTAGCT  
CATTTGTACCCAGGTTTGATCACAATTCCCCCTACTCTCCTGCTCCTGAAGTAA  
CTACATTATTCTTATTATAGCTTTTAGTTATTATATTAGGTTATAGGTGTACCATGG  
AGCATGTGTAGTATTGTCTTGAAAAAATATACATAAATGGTATACTTTTGTCTC  
CCTCACATTAGTTTTTTCTTACTATCATTTAGTTTTTTAAGATTTATCCCCATTGG  
AGTGTAATAGCTATAGTCTTTTCAATTACTGTGTTGTACTTCCTCATTTTTATAA  
ATATAACCATACATTATTATCCATTCCTCTAAGGGTGGGCATTTATGTTGTTTCTCA  
AGGTTTTGCTATTACAGTGTGTTACAACGACATCCTTAGCTTAGCTGGTCTCCT  
TGTCTTATACAAATTTTACTGACCTTTCAAGATCCTGCTTATCCCAGCCCTCTGG  
AAAGCCTTCCCTGAATCCCCAGCCCACAGCGCCAGCGGGTAAAGTCTGGTA  
CTCTGTGCTGCTTGTGCATCTTTGGTATCATCCCACTGCTAAGCACACACAGCT  
ACGCAAAGTAAGGCACTTAAGAAAATATTCGCTACACGGATGAACAAATGAAT  
GAATGAATGAAGCAGTACCACTCCGTGATGGCTCTATCTTTAATGGACTTTGGC  
GCCTTTGGCCCACTTTCTCCTTCTTGACAGCACTGGTCCTACTCCAGAGCATTC  
CTCTAGCTAGCAAAGCAGTGTGTGGATGTGTGGGTGTAGGGTGGCGATACAG  
ACCTCACTTCGGATGAGGACCGCCTCCCTGCAAGTTCACGATCCCGGCAACTC  
CAGCGCTTGAAGTTCAGGAGGTTCCACCCCCACCCCTCACCCACGCCCCCTC  
TGCACTGGTCAAGCCATGAGCCGCTGCAGGCCCTGATCGAGTTAAGGCTGCT  
GGAGAAGGATGCGGACGGGGCCGCGACTTCGTAGTAGATCCCTTCCGCGCGA  
GCTCGGGCCGGCGCTTTCCCGTGGAAACCCTGGGTGCCAAGGCGGCGTG  
CCGAGGCTGCGGTGGCGACAGTGGGGCGGGGCTTGCGGTGGGAGGAGGTGG  
CTGAGGCGAAGGACACACGAGGTTGCTTCGCTGCACACCTGAGAAAGTTTCA  
GCCAACTTGGGCGGTGGTGGCGGCTGAGGCGGCGGCTGAGGAGCGGCGGG  
ACTCAAGGGGGAGTCGAGGTATTTGCGCCTCGTGCTTCGGACCGTAGCGCTAG  
GCCTGAGCCTTTGAAGCAGGAGGGAGGGGAGGAGAGAGTGGGGCTCTCTATC  
GGGACTTTCTCATGTGGATTCGCCCA**GGTGGCGGTGGCGGGTGGGCGGGCGGC**

GGTGGCGGCGGCGGGTGGTGGCGGTGAAAAGTGGCGGCGGCGGCGGTGGCG  
TGGCGGCGGCGGCGGCGGCGGTGGCGGCGGCGGCGGCGGCGGCGGTGGTGG  
CGGCGGTGGCGGTGGCGGCGGCGGTGGTGGCGGTGGCGGCGGGCGGTGGCG  
GTGGCGGCGGCGGCGGTGGCGGCGGGCGGCGGCAGTGGTGGCGGCGGTGGC  
GGTGGCGGTGGCGGCGGCGGTGGCGGCGGCGGCGGCGGCGGCGGCGGTGGT  
GGCGGCGGCGGCGGCGGCGGCGGCGGCGGCGGCGGCGGTGGCGGCGGCGGCGG  
GGGTGGCGGC

**F5-II:1-read 2**

GGGGACTACAGGAGCTGGTCTCCAAGCCAAAGGAAACAAAAAAGATAGGGA  
CAGAAACAGCAAGATATGTTTGGGGAATCTCAAGTTAGCTAATACTGTTATTGT  
GTGAAGTTCAAATAGGGTAGGGAGCAGGTGAGATGTGGGGCCCAATGACGAA  
AAGGCCTTGTATGTACCATGTTTAGAAGTTTTGGAATTTTATCCTATAGGAGTCA  
GGGAGAGGTTCTATGGGTAGGATTCATCCCAACAGGATTGTAAACTCCCAGC  
ATCCAATTAGTCACACCTCCATTTTTTTTTCTGTTTCTTTAACATTGTCTCAGA  
CTATTCCTTCTGGAAATCTACCTTATTATTAGTTCAGGTCTTCTTTAAATTTGTGC  
CTGGACTGTTACCAACTTGACTGGTCCTGGGGCTCCAGTTCACCTCAAGTTC  
TTAACAATCAATTAATTTTTCTACAGAACTATCAGAGCAATCTTCCTTCCATCAA  
TCTCAACTTGTTCAAAAACTTTCAATAGTTTTATGTGACCTAAGAGTAGCTGC  
CTCCTCACCCCTTTCAGCTTGCCATTCAAGGCTGCATAATTTGTCCCAACCCCT  
TTCCGTCCTTCTTGACTCCTCTCACTGCTAACAGAGACAGAACTCATTACTTA  
CTTCTTTGACTGTACCCCTTGCTTCTCACGAGGGCTCTCCTTCCTAAATGATATG  
TCCATACAACTATTGTTGTTGTTCTTACTTTTAGCTCTTTTCTTAGCTCCACTTGT  
ACCCAGGTTTGATCACACCCCTACTCTCTGCCCCTGAAGCACCATTATTCTGT  
TATAGTCTCTTAATATCTATATCTATATTCATATATATGCATCCACAGATAATGTGT  
GGTATTGTCTTGAAAAATACATAAATGGTATACTTTGGTCTCCCTCTTATTAGT  
TTTTTCACTATCATTTAGTTTTTAAGATTTATCCCTTATTGGACATAAATAGCTAT  
AGTCTTTTTCACTACTGTGTTGCATTTTATAAATATGTACCATAATTATT  
CATTCATTCCCTAAGGGTGGGCATTTATGTTGTTTCTGCTGTTTCTGTTATTAC  
AAAAAGTTACAATAATATCCTTAGCTAGTTGGTCTCTTGTCTTATGGGCCAAA  
TTTTTACTGACCTTTCAAGATCCTGCTTTCATCCCAGCAGCTCCTCTGGGAAAA

GCCTTCCCTGAATCCCCAGCCCACAGCTGCAAAAGTCTTGGTACTCAAAGTTG  
CTTTGTGCATCTTGTATCATCCCACTGCTACACACAATAGCCACGCAGAAAGTA  
AGGCACTTAAGAAATATTCGCCACGGATGAACAAATGAATGAATGAATGGGGC  
ATACCACTCCGTGATGGCTCTATTCCTTTTAATGGACTTCATGCCTTGGCCCACT  
TCTTCTCCTTCTTTTTGACAGCACTGGTCCTACTCCAGACATTCCTCTAGCTAG  
CAAAGCAGTGTGTGGATGGGGTGGGGGTGTAGGGTGATACAGACCTCACTGA  
CGAGGACCGCCTCCCTGCAAGTTCACGATCCCGGCAACCCAGTGCTTGAAGC  
TCAGAGTCCTACCTCAATTCCCCCTCACCTCCACGCCCTTCTGCACTGGTCGAC  
AGTGAGCCGCAGCCCCTGATCGAGTTAAGGCTGCTGGAGAAGGATGCGGACG  
GGCCAGTGACTCGTAGTAGATCCCTCCGCGCGGAGCTCGGGCCGGCGCTTCT  
TCCTGCGTGGAACCCTGGTGCCAAGGCGGCCGGAAGCCGAGGCCGCGGGC  
ACAGTGGGGCGGGGCTTGCGGTGGGAGGAGGCCGCTGAGGCCGGAAGGACACA  
CGAGGCTGCTTCTTGCCGCAATACCACCCGAGAAAGTTTCAGCCAAACTTCGG  
GCGGCGGCTGAGGCCGCGGCCGAGGAGCGGCCGACTTTTCGGGGCGCGGGG  
AGCGAGGCATTTGGTGCCTGTGCTGGACCGTGCGCCTGTGCTCTGAGCTTTGG  
GGCAGGAGGGGAGGGAGAGAGTGGGCTTCCTTATCGGGACCCCTCCCTATGT  
GACTCGCTTCCA **GGCGGCCGGCGGTGGCGGCCGGCGGCCGGCGGTGGCAAGGT  
GGTGGCGGTGGCGGCCGGCGGCCGGCGGTGGTGGCGGCCGGCGGCCGGCGG  
CGGTGGCGGCCGGTGGCGTGGCGGCCGGCGGCCGGCGGCCGGCGGTGGCGGCC  
GCGGCCGGCGGCCGGCGGCCGGTGGCGGCCGGCGGCCGGCGGCCGGCGGCCGG  
GCGGCCGGTGGCGGTGGCGTGGCGGCCGGCGGCCGGCGGCCGGCGGCCGGC  
GGCGGCCGGCGGCCGGCGGCC**

**F5-II:1-read 3**

GTGGAGGACTGTCTCTGTTATTAGAGGGAGGAATTTATTATTGTGGTGTGCGC  
CGTGGTCTTTGGACTGAAGGATAGTTATGGTAGAAGTTCATTAGAGGAGGAGG  
GAAGGGGACTACAGGAGGGTCATTCAGGCAAAGGAACAAGATACAGGGACC  
CAGAAACAGCAAGATGTGTGGGGGAATCTCAAGTTAGCCAATACTGTTATTGT  
GTGAAGTTCACAACAGGGCAGGGAGGAGAGGACAGGAGATGGGGCCCAATG  
TGAAAAGACCTTGTATGTACCATGATTTGAATTTTATCCTATAGGAGTCAGGG  
AGAGGTTCTATGGGTAGGTTTACATCCCAACAGGATTGTAAACTCCCATCCAAT

TATAGTCACACCTCCATTTTTTTTCATTTCTTTAACATTGCATCTCAGATTCATTC  
CTTCTGAAATCTACCTTATTAGTTCAGGTCTGTAGGTTGTGCTGGACTATTTTCAT  
AACTCTTGACTGGTCCTGGGCTCCAGTTCACCTCTTACTCCAACAATCAATTTT  
CTACAGAACTATCAGAGCAATCTTCCTTTCCATCAATCTCAACTCTGTTCAAAA  
ACTTTCAATAGTTTATGTGACCCTAAGAGGTAGCTGCCTCCCCACCTTTCAGCT  
TGCCATTTCAAGGCTGCATAATTTGGTCCCAACCCCCTTCCGTCCTTGACTCC  
TCTCCTGCTAACAGAGACAGAACTCATTTTACTTACTCTTTTGACTGTACACCT  
TTGCTTTCCACGAGGGCTCTTTCCTGGAATGATATGTCCATACAACTGTGTGTT  
GTTGTTCTTGCCTGGCTCTTTCCTGGCCCACTTGTACCCAGGTTTGATCACCCC  
TACTCTCCTGCCCTGGGTAAGTCTATTAGTATAGATCTTAGCTATCACCATC  
TATATCTCTATATATAACCATCTTTAGATAATGTGTAGTATTGTCTTGAAAAAAT  
ATACATAAATGGTATACTTTGTCTCCCTCTCTGCGATTAGTTTTTTTTTCACTATCA  
TTTTAGTTTTAAGATTTATCCCTATTGACATAAATAGCTGGTCTTCCAATTACTGT  
GTTTTTCATTTTATAAATATACCATACATTGTTACATCCATTCCTCTAAGAGGTGG  
GCATTTATATTTATTTTCAAAGGTTTGTCTATTACAGTGTTACAACGAATATCCTTA  
GCTTAGCTGGTCTCCTTGTCTTGCCTAAATTTTACCCCCTGACCTTTCAGATC  
CTGCTTTCATCCCAGCTCCTCTGGGAAAGCCTTCCCTGAATCCCCCAGCCCAC  
AGCAGCAAAGTCTCTTGGTGCTGCTCAAGTTGCTTGTGCATCTTTGGTATCATC  
CCTGCCAAGCACACAGCTACATAAAGTGTTACTTAAAATATTAGCCGTTGACA  
AATGAATGAATGGGGCAGCACCCTCCGTGATGGCTCTATTCTTTTGGCTTTG  
GCGCCTTGGCCCACTTTCCTTCTTTGACAGCACTGGTCCCTACTCCAGAGCATT  
CCTCTAGCTAGCAAAGCAGTGTGTGGATGTGTGTGGGTGTGGGTGGCGATATA  
CAGACCTCACTGGATGAGGTGCCTCTGCAAGTTCACGATCCAGCCCAAACCTCC  
AGTGCTTGAGTTCAGATTACACCCACCCCCTCACCTCCACGCCTTCTGCACTG  
GTCCAAGCCAGCGAGCCGCTGCAGCCTAGTCGAGTTAAGGCTGCTGGAGAAG  
AAGGATGCACGGACAGGGCCAGTGGCTCGTAGTAGTCCGCGCGGGAGCTCGG  
GCGGCACTTCTTCTGCAAGAAACCCTGGGTTGCCAAGGCGGCGGGGCCGA  
GGCCACGCGGCAATGGGGCAGACTTGCAGGTGGGAGGAGGCGGCTGAGGCGG  
AAGGACACGAGGCTGCTGGCTGCACCCGAAAGTTTCAGCCAAACCGGGCGG  
CGGCTGGGCGGCGGCCGAAGACGAGCTCAGGGCGCGGGGAGTCGAGGCATG

CCTGCGCTGCGGACCGTAGCGCCAGGGCCCTGAGCCTTTGAAGCCGCAGGAG  
GAGGTGAGACGTCTCGGTTCCATCATGTGGATCTGCCCA **GGCGGGCGGCGGCGG**  
**CGGCGGGCGGCGGCGGCAGCGGGCGGCAGCGGGCGGCGGCAACGGCGCGGCGGC**  
**GGCAGCGGGCGGCGGCGGCAGCGGGCGGCGGCGGGCGGCGGCGGCGGCGGCGGC**  
**AGCGGGCGGCGGCGGCGGCGGCGGCGGCAGCGGCAGCAACGACGGCAACGGC**  
**AGCAGCAGCAGCAGCGGCAGCAGCGGGCGGCAGCAGCGGCAACGGCGATGGC**  
**TGCAACGGCAGCAGCGGCGGCGGCGGCGGC**

**F5-II:4-read 1**

GAAGACAGGAGGGACTGGTCTGTTAGAGGAGGAATTTATTGTGGTGTCCGCA  
AAGCCTTCTTTGACTGAAGGATGAATTATGATTGTAGTTCATTAAGAGGAGGA  
GGGAAGGGGACTACAGGAGTCAATCCAAGCCAAAGGAACAAAAGTATTACAG  
GAGAAACAGCAAGATATGTTTGGGGAACTTGCCAGCCAATACTGTTATTGTG  
TGAAGTCTGGCTACCAGGCAGGAGGACACAGAGATGTAGTCTAATGACTTAA  
AAGCAAGGCCTTGTATAAAAATTCCATGTTTAGAAGTTTGAATTTTATCCATA  
GGAGCTGTGAGAGGTTCTATGGGTAGGATTTCCCATCCCAACAACAGGATTGT  
AAACTCCACATCCAAGAATTAGTCACACCCCCATTTTTTTTTTTTCTTGCTTTT  
AACATTGTCTCAGATTCATTCTTCTGAAATCTACCTTATTAGTTCAGGCTCAAT  
TTGTGCCTGGACTGTTCACTCAACTCTTGACTGGTCCTAACGCAGTTCACCTCT  
TTGCTCCCAACAATCAATTTTCTACAGAACTATCAGAGCAATCTTCCTTTCCAT  
CAATCTCAACTCTGTCTGGGCAACTTTCAATAGTTTTATGTGACCAAGAGGTG  
AAGCGTTTCACCTTTCAGCTTAAGCATTCAATGCTGCATAATTTGTCCCAAC  
CCTTCTCGTCCTTGACTCTCATTGCTAACAGAGACAGAACTCATTATTTACTC  
TTGATTGTACCTTTGTTTACGAGGGCTCTTTCCCTGAATGATATGTCCACAAC  
TTGTTGTTGTTCTTACTTTTAGCTCTTAGCCCACTTGTACCCAGGTTTGATCACA  
CCCCCACTCTCCTGCCCTGGAAGTAACTACTATTCTGGTTATAGTCTTCAATAT  
CTATATCTATATCTATATATATGCATCCACAGATAATGTGTAGTATTGTCTTGAAA  
AACATAAATGGTATACTTTGTCTTCATGTATTAGTTTTTTTTTCACTATCATTTAGT  
TTTTAAGATTTTATCCCTATTGACATAAATAGCGGCGTCTTTTCATAATTACTGTG  
TTGCATTTCAATTTATAAACATAACCACATTATCTATCCATTCTCTAAGGGTGGCAT  
TTATGTTGTTTTCTGGCTGTTTTGCTATTACAGGTGTTAGCAAACGAATATCCAG



AGCAATCTTCCTTTCCATCAATCTCAACTCTGTTCAAAAACCTTTCAATAGTTTT  
ATGCACCAAGAGGTAGCTGCCTCCCCACCCCTTCAGCTTGGCTATCTCAAGG  
CTGCATAATTTGTCCCAACTCCCCTTCCGGCCCTGACTCCTCTCACTGCTAACA  
GAGACAGAACTCATTACTTACTTCTTTTGACTGTACCTTTGCTTTCACGTAGG  
GCTCTTTCCTGGAATGATATGTCCATACTATTGTTGTTGTTCTTACTTTTAG  
CTCTCTTTCTTAGCCACTTGTACCCAGGTTTGATCACACCCCCTACTCTCCTG  
CCCTGGAAGTAACTACTATTCTGGTTATAGTCTCTTTAATATCTATATCTATATCT  
ATATATATGCATCCACAGATAATGTGTAGTATTGTTCAAAAAAACATACTACAA  
ATGGTATACTTTTGTCTCCTCTTATGCATTAGTTTCTTCACTATCATTAGTTTTAA  
GATTTATCCCTATTGGAGTACAACAGCTATAGTCTTTTCAATTACTGTGTTGCAT  
TTCATTTTATAAATATATCTATACATTATTCATCCATTCCTCTAAGGGTGGGCATTT  
ATGTTGTTTTCAAGGTTTTGCTATTACAGTGTGTTACAACATAATCCTTAGCTT  
AGCTGGTCTCCTTGTCTTATACAAATTTTACTGACCTTTCAAGATCCTGGCTTAT  
CCCAGCTCCTCTGGGAAAGCTCTCTTCCCTGAACTTCAGCCTAAGCGGTAAAG  
TCTTTGGTACTCAAAGTTGCTTTGTGCATCTTGCATCATCCCACTGCTACACAC  
AGCTACGCAGCAAGGCACTTAAGAAATATTCGCTACACGGGATGAACAAATGA  
ATGAATGAATGGGGCAGCACCACCTGTGATGGCTTCTATTCTTTAATGGACT  
TTTGGCGCCTTGGCCATTTTCTCTTTGACAGCACTGTCCTACTCCAGAGCAT  
TCCTCTAGCTAGCAAAGCAGTGTGTGGATGTGTGGGTGTAGGTGGCGATACAG  
ACTCATCCTCGGATGAGGACCGCCTCTCCCTGCAAGCTCACGATCCCGCAAAC  
TCCAGTGCTTGAAGTTCAGAGAGTCCACTCCCCACCCCTCACCTCCACGCCC  
TTCTGCACTGGCTGCTTGTGTGAGCCGCTGCAGCCCTGATCGAGTTAAGGCT  
GCTGGAGAAGGATGTGATCAGCCAGTGACTIONGCTAGTAGATCCCTCCGCGCGGA  
GCTCGCCGGCGCTTCTTCTGCGGGAAACCCTGTGCCCAAGGCGAGGAAGGA  
GGCCGCGGCGACAGGGGCGGGGCTTGCAGGTGGAGGAGTAAGGCTGAGGCGG  
AAGGACACACGAGGTTGCTTCTGCTGCACCTGAGAAAGTTTCGCGCCAACT  
TCGGGCGGCGGTTGAGGCGGCGGCCGAGGAGCGGCGGACTGGGGCGCGGGG  
GAGTTGAGGCATTGCGCCTGTGCTTCGACCAAAGTGCCAGGGCCTGAGCTTTG  
AAGCAGGAGGGAGGGGAGGAGAGAGAGGTTTCTCTATTGGACCCTCCCATGT  
GGATTCGGGTTTGTGTGGCGGTGGCGGTGGCGGTGGTGGCGGGTGGTGGCGG





GTGGGCATTTTATGTTGTTTTTCAGGGTTTTGCTATTACAGTGTTACAACCTTGAAT  
ATCCTTAGCTTAGCTGGTCTCCTTGTCTTATACAAATTTTACTGACCTTTTCAA  
GATCCTGCTTTTCATCCAGCTCCTCTGGGAAGCCCTTCCCTAGATCCCTGACCC  
ACAGCTGACAGTACTCAAAGTTGGCACGGCATCTTTGGTATCATCCTGCCAAG  
CACACAGCCTACTACGCAAAGTAGGCGCAGAAATATTCCTTCACGGATGAACA  
AATGAAGAAATGAATGAATGGGGCAGCACCCCTTCCGTGATGGCTCTATTCTTT  
TTAATGGACTTTGGCGCCTTGGCCACTTTCCTTCTTGACAACCTGGTCCTGCTC  
AGAGCATTCCTCTAGCTAACAAAGCGGTGTGTGGATGTGTGGGTGTAGGTGGC  
GATACAGACCTCACTGGATGAACCGCCTTACTCTCCCTGCAGTTCGATCGGCA  
GAGCTCCATTGCGCGGGGACCAGAATTCTACTTGCCCCCTACTCCACCCTTCT  
GCACTGGTCAAGCCAGCGAGCCCCTGCAGCCCACAGTAGTTGAGGCTGCTG  
GGAGAAGGATGCGGACAGGGGTTGATGACTCGTGGTAGATCCCTCCGCGCGC  
GGAGCTCGGGCAGCGCTTCTTCTGGGAAGCCCCTAGGTGCCCAAAGCGGCGG  
GGCCGAGGCCGCGGCATTTCAATCAGGGCAGGGCTTTGCGGTGGGAGGGAGG  
CGGCTGAGCGGAAGGACACACAGGGCTGCTTCGCTGCACACCGGTTCAAAGC  
CAGAGCTTCAGGCGGCAGCTGAGGCGGCAGCCAGGGGCGTGACTCCAGGGC  
GCAGGAGTCGGGCATTGCGCCTGTGCTTCGGACCGTAGCGCCAGGGCTAGGC  
CTTTGAAGGCAGGAGGAGGAGAATTAGGGCTCCTATCGGGACCCCCCTCCAT  
GGATCTGCCCA **GGCGGCGGGCGGGCGGGCGGGCAGCGGCAGCAGCAGCAGCA**  
**GCGGCGGGCGGCACGGCAGCAACAGCAGCAACGGCTTGGCGAAGCGGCGGGC**  
**GCAGCGGGCGGGCGGGCGGGCGGGCGGGCGGGCGGGCGGACGGCAACAACGGCA**  
**GCAGCAGCAGCGGGCGGGCGGGCGGGCGGGCAGCAGCGGGCGGGCAGCAGCA**  
**ACGGCTGGCAACGGCAACAGCAGCAGCAGCAGCAGCGGCAGCGGGCGGGCAGC**  
**GGCGGGCGGGCAGCGGCAGCAGCGGCAGCGGCAGCGGGCGGGCAGCGGGCGGCAGC**  
**GGCAACGGGCGGCAGCTGGCAGCGGGCGGCAGCGGGCGGCAGAGGAAGGCGGC**

**F9-II:6-read 2**

GGCCTTTGTAATATGTTTAAAGTTTGAATTTATCCTATGAGTCAGGGAGGTTCTAT  
GGGTAGGATTCCCATCCCAACAGGATTGTAAGCTCCCACATCAATTAGTCACAC  
CTCCATTTTTTTTCTGTTTCTTTAACATTGTCTCAAGGTTGTTCTTCTAATCTAC  
CTTATTAGTTCAGGTCTTCTTAAATTTGTGCCTGGACTGTTACCAACCTCTTG

ACGGTCCTGGGAGCCAGTTTCACCTCTTGCTCCCAACAATCCAATTTTCTACA  
GAACTATCAGAGCAATCTTCTTTCCATCAATCTCAACTCTGTTCAAACTTTCA  
ATAGTTTATATGACCCTAAGAGGTAGCTGCCTCCCCACCCCTTTCAGCTTGCCA  
TTCAGGCTGCATGTAATTTGGTCCCAACCCCTTTCGTCCTTGACTCCTCTCA  
CTGCTAACCAGAGACAAGAACTCATTGCCTCTTTTGACTGTACCTTTGCTGCTT  
TCTGAGGCTCTTTCCTGGAATGATATGTCACGCTGTGTTGTTGTTCACTGGCTC  
TTTTACTTAGCCACTTGCCCAGGTTTGATCACACCCCTACTCTCTCCTGCCCT  
GGAAGTAACTACTATTCTAGTTTCAGTCTCTTAATATCTATATCTATGTCTATATAT  
ATGCATCTACAGATAATGTGTAGTATTGTCTTAGAAAAAATATACATAAATGGT  
ATACTGTCTCCTGCGATTAGTTTTTTTCACTGTATTTGTAGTTTTTAGATTTATCC  
CTGACATAATGTGCAAATTACTTTTTCCATTACTGTTGCATTTCATTTTATAAATA  
TACCATACATTATTCATCCATTCTACTCTAAGGGTGGGCATTTATGTTGTTTTCA  
GGTTTTATTACAGTGTTATGAATATCCTTAGCTTAAGCTGGTCTCCTTGTCTTATA  
CAAATTTTACTGACCTTTCAGATCCTGCTTCATCCAGCTCCTCTGGGGCTTCCC  
TAAATCCCCAAACACAGCAGCAAAGTCTTGGTACTCAAAGTTGCTTGCATCTT  
TGGTATCATCCACTGCAAGCACACA ACTCACATAAAGTAAGGCACTTAAATATT  
ATACGGATGAACAAATGAATGAATGAATGGGCAGCACCCTCCGTGATGACCA  
TTGCTTTAATGGACTGGCGCCTTGGCCACTTCCCCTTGCGACTGGCAGCAC  
TGGTCCTACTCCAGAGCAGCCCTCTAGCTAGCAAAGCAGTGTGTGGATGTGTG  
GGTGTAGGTGGCGATACAGACCTCACTGGATGAGGACCCACTTACTCTCCCTG  
CAAGTTCGATCAGCAGCAGAGAGCTCAGTGCTTGAAGTTCAGGTGCACCCCT  
GCCTCCACGCCCTTCTGCACTGGTCAAGCCAGCAAACCGCTGCAGCCCTGAT  
CGAGAGTTAAGGCTGCTGGAGAAGGATGCGGACAGGGCCAGTGA CTGACTCAGTAG  
TGAATCCCTCCGCGCCAGACTCGGGCCGGCACTTCTTCCTGCAGGGAAACCC  
TGGGTGCCCAAGGCAGGCAGGGGCCAGGCCGCGGCGACAGTGGGGCGGGA  
GCTTGCAGTGGGAGGGAGGCGGCTGAGGCCCGGAAGGACCACAGGCTGCTT  
CGCTGCACACCCGAGAAAGTTTCAACCAA ACTTCGGGCGGCTGGGCGGCGGC  
CGAGGAGCGGCGCTTTCAGACTGGGGGCACGCAGGGGAGTCAAGGCATTGC  
GCCTATGCCTTCGGACCGTAAGCGCCAGGCCTGAGCCTTTGAAGCAGGGAGG  
AGGGAGGAGAGTGGGGCTCCTCTATCAGGACCCCTCCCATGTGGATCTGCCCA



GGGTCCTGTTTCATCCAGCTCCTCTGGGAAAGCCTTCCTGAATCCCCCAGCCC  
ACAGCAAAGTCTTGGTACTCAAAGTTTAGCATTGCATCTTTGGTATCATCCACC  
AGACACAGCTACATAAGTAAGGGCATGAAATACCTTCGCTACACAGATGAACA  
ATGAATAGATGAGTGAATAGCACCACTCCATGGTGGCTCTATTCCTTTTTACCT  
GTGTGGACTTTGGCACCTTATTTTTCTTCTTGTGTACTGAATTCTCAGAGCATT  
CTCTAGCTATAGAAGCAGATGTGTGGATGTGTGGGGTGCAGGGGTGGCAGTGA  
ACCTCACTGGATGAGGACCGCGCCTCTCCCTACACAAGTTCAGTCAGCAA  
ACTCCAGTGCTTGATTTGAAGTCCCTGTACCCCTCACTGCGCCCCTTCTGCACTGG  
TCAAGCCAGCAGGCCGCTGCAGCCCTGATCGAGTTAAGGCTGCTGGAGGAAG  
GATGCCAGACAGGGCCAGTGACTCGTAGTGAATCCCTCCGCGCAGGCCAGGC  
CAGCGCTTCTTCTGGGGAACTGAAATTTTGGGCGGCGGGGCCAAAAGGCC  
CTTGGCGACAATGAACGAACACACGCACGTTGGGAGGAGCGGCTGGGAGCG  
GAAGAACACACAGACTGCTTCGCGCTGCACCCGAAAGTTCAATAATGAACT  
GGGCGGCGGCTGGGGGCGGCGGCGAGGCAGCAGGCTCCGGGGCGCGGGGAG  
TCGAGGGCATTTCGCGCTGTGCTTCGGACCGTGGCGCGCCAGGGCTGAGCCTT  
TATGAAGCAGGAGGAGGGAGAGAGTCGGGCTCCTCTATCGGGACCCCTCCC  
GTATGGATCTGCCGGGCGGCGGCGGCGGCGGCGGCGGCGGCGGCGGCGGCAGC  
GGCGGCGGCGGCGGCGGCGGCAACAACGGCAGCAGCAGCGGCGGCGGCGGCGG  
CGGCGGCGGCGGCGGCGGCGGCGGCGGCGGCGGCGGCGGCGGCGGCGGCGGCGG  
ACGGCAATGGCACAGCAGCAGCAGCAGCAGCGGCGGCGGCGGCGGCGGCGGCGG  
CGGCGGCGGCGGCGGCGGCGGCGGCGGCGGCGGCGGCGGCGGCGGCGGCGGCGG  
GGCGGCGGCGAAGCGGCGAAGCGGCGGCGGCGGCGGCGGCGGCGGCGGCGGCGG  
GCAGCAGCGGCGGCGGCGGCGGCGGCGGCGGCGGCGGCGGCGGCGGCGGCGGCGG  
CGGCGGCGGCGGCGGCGGCGGCGGCGGCGGCGGCGGCGGCGGCGGCGGCGGCGG  
AAGGCGGC

**F9-II:6-read 4**

GGGAGGAAGGGACTGAGGTCATTCCAAGCAAAGGAACAAGATACAGGGACA  
GAAACAAGATATGTTTGGGGAATCTCAAGTTGGCAATACAACTGACTTGTGTG  
AAGTTCACAACAAGGCAGGGAGGATGGGAGCCCAATGAAGGCTTATGTGTAC  
CATGTTTGAGAAGTTTGAATTTATCCTGAGTCAGGAAGGGATTCTATGGGTGG

GGTTTTCATTAACAGGATTGTAAACTCCCACATCCAATTAATTACACCTCCATT  
TTTCTGTTTCTTTAAGCAACCTTCTCAGATTCATTCCTTCAAATCTATGTTGATA  
GTTCAAGTCTTCTTAAATTTGTACAGATGTTCTGGCTCCCAGCTAGTCCTGGGC  
TCAGTTGCCCTCTTGCTCCCAACAGTGAATTTTCTACAGACTTCTCAGAGCA  
ATCTTCTTTTATCAAATATCAACTCTGTTCAAAAACCTTTTAATTAGTTTATTCTTG  
TTGTTCAAGGGTAGCTGCCTCACCTTTGTGCCATTCAGGCTGTAATTTGGTCC  
CCAACCCCTTTCAAGTCCTTGGCTCCTACCATACTAACAGAGACAGAACTCAT  
TGCTTCTTTTGACTGTACCTTTGCTTTCACAGGGCTCTTTCCTGAGATAATTATC  
CATAAGCTATTGTTGTTGTTCTTACTTTAGCTCTTTTCTTGCACTTGCAGTTTGA  
TCACCCCTACTCTCACACCCCTGGGAAGTAACTTTTCTTCTAATTTATAGTCTC  
TACCATGTCTATCCTCATATATATATGCATCCCACAGATAATGTGTAGTATTGTCT  
TGAAAAATATACATAAATGGTATACTTCTTCTCCCTCTACGATTAGTTTTTCC  
TATCATTTAGTTTTAGATTTATCCTATTGACATAAATGCTTTCTAGTCTTTTCAAT  
TTTATTGCATTCATTTTATAAATACTACCATTATTCATCCATTCCTTAAGGGTGAG  
CATTTATGTTATTTTCAGGGTTTACTATTACAGTGTTGATGAATATCCCTTAAGCA  
GCTGTCTCTAACCTCATATACAAATTTTACCCAGCCTTTCAAGATCCTGCTTTC  
TGTGCCCAGCTCCTCTGAGAAGCCTTTACTGGTCCCAGCCCACAGCAGCAAGT  
CTTGGTACTCTACAGTTGTGTCTTTGGTGCTCGTCACTGTAAACACCACAGCTA  
TAAAGTAAGGCATGAAATATTCATGGATGAACAATGAATGAATAGACCAGCTTC  
CTTCCGTAATTAGCTCTATTCCTTTTTAATGGACTTTGGCCACTTTTCTTCTTG  
ACAGCATAATTACCTCCAGGCATTCCTCTAGCTATGCCGTGATGCCGGATGTGT  
GGGTGGGTGGCGATACAGACCTCACTGGATGAGGGACCGCCTCTCCCCTGCA  
GTTACAGATCCCAGCGAAGCTCAGGTGCTTGAAGTTCAGGTCCCTACCCCCC  
CTGCCTCCACGCCCTTCTGCATAGTGAGCCAGCGAGCCGCTGCAGCCCTGATC  
GAGTTAAGGCTGCTGGAAGGATGCGGACAGGGCAATGATGACTCGTGGTAAG  
ATCCCTCGCGCGGGCCTCGGGCCAGCGCTTCTTCTGCGGGAAACCCCTGGGTG  
CCCAGGCGCAGCAGGGCCGGGCCGCGGCGACAGTAAAGACAGAGGCCCTGC  
GGTGGGAGGGAGGCGGCTGGGCGAGAGGACACACGAGGGCTGCGCTGCACC  
AGAAAGTTTCGTATTAACCTTCAGGCGGCGGCTGAGGCGGCAGCCGAGGCCA  
CAACAGACTCAGGAGCGCAGGAGTCAGGGCATTGCGCCTGTGGCTGGACCAT

GGCGCAGGGCCTGAGCCGCTGGAAGCAGGAGGAGGGAGAAGTGGGCTCCTG  
GGACCCCCCTCCCATGTGGTCTGCCAGGCGACGCTGGCGGGCGGCAGCAGC  
GGCGGCAGCGGCAGCGGCAGCAGCAACGGCAACGCGGCAGCGGCAGCGGC  
GCGGCAGCGGCAGCAGCGGCCAGCAGCAGCAGCAGCAGCAACAGCAGCAAC  
AGCAACAACAACAGCAACGGCAGCAGCAGCAGCAGCAGCAGCAGCAGCGGCAGC  
AGCAGCAGCAGCAGCAGCAGCGGCAGCAGCCCAGCAGCGGCAGCAACAACA  
ACAGCAACAACAGCGCGGCAACAGCAGCAGCGGCAGCAGCAGCAGCAGCAA  
GCAGCAACAGCAGCGCTGGCGGCAGCAGCAGCAACAACAGCAGCAGCAGCA  
GCAACAGCAGCAACAGCAACAGCAACAACGGCAACAGCAGCAGCAGCAGCA  
GCAGCAGCAGCAGCAGCAGCAGCAGCAGCAGCGGCAGCAGCAGCAGCAACA  
GCAACAGCAGCAACAGCAACGGCGGC

**F9-II:6-read 5**

GGAGACGGTGGAGGGACTGTCTGTTGGGGAATTTATTGTGTGTCGGCAAAAG  
CCTTCTTTGGACTGAAGGATGGTGCCAGTTAGAAGTTCATTAGAGGAGGAGGA  
AGGGACTGAGTCATTCCAAGCCAAAGACAAAAGATACGGGACAGAAACAGC  
AAGATATGTTGGGGAATCTGGGATTAGCTAATACTGTTATTGTGCTGAAGTTTC  
ACAACAGGGGCAGGGAGGACAGGAGATGGGGCCCCAATGTGAAAAAGGCCT  
TGTATGTACCATGTTTAGAAGTTTGAATTTTATCCTATAGGGAGTCAGGAGAGG  
TTCTATGGGTGGGGTTCCCATCCCAACAGGATTGTAAACTCCCACATCAATTAG  
TCACACCTCCATTTTTTTTCTGTTTCTTTAACATTGTCTCAATTCATTCTTCTA  
GAAATCTACCTATTAGTTCAGGTCTTCTTAAATTTGTGCTGGACTGTTCAAA  
CTCTTGACTGGTCCTGGGGCTCCAGTTCACCTCTTGCTCCAACAATCAATTTTC  
TAGAACTATCAGAGCAATCTTCCTTTCCATCAATCTCAACTCATTTCAAAATT  
TCCAATAGTTTTATGTGACACAAGGGTAGCTGCCTCCCCACCCTTTCAGCTTGC  
CATTCAAGGCTGCATAATTTGGTCCCAACCCCCTTTCAGGTCGCGGCTCCTCAC  
TGCTAACAGAGACAGAACTCATTACTTACTCTTGGCTGTACCTTTGCTTTCAC  
GAGAATGCTTTCCTGGAATGATATCCACTACAATATTGTTGTTGTTCTTACTTTT  
TAGCTCTTTTCTTAGCCCACTTGTACCCAGGTTTGATCCACACCCCCTACTCAC  
TGCCCTGGAAGTAGCTGCTATTCTGATTTATAGTCTCTTAATATCTATATCTATAT  
CTATATATATACCGTCACAGATAATGTGTGGTATTGTGCGAAAAATATACATAAA

TGGTATGCTTTGTCTCCCTCTACGATTAGTTTTTCACTGTCATTTAGTTTTTAGAT  
TTATCCCTATTGACATAAATAGCTATAGTCTTTTCAATTACTGTGTTGCATTTTCAT  
TTTAACAAATATAACCATAACATTATTCATCCATTCTCTAAGATTTGGGCATTTATG  
TTGTTTTTCAGGTTTTGCTATTACAGTGTTACCTTGAATATCCTTGGCTTAGCTGG  
TCTCTTCTTGTCTTATACAAATTTTTACTGACCTTTCAAGATCCTGCTTTCATCC  
AGCTCCTCTGGGAAAGCCTTCCTGAATCCCCCAGCCCACAGGCGGCAAAGT  
CTTGGTACTCAAGTTTAGCAGCCATCTTTAAGGTATCATCCCACTGCCAAACAC  
ACAACCTCATAAGCCAGGCACTTAAGAAATATTCCTTTGCGGATGAACAAATGA  
ATGAATGAATGGGGCGCAGCACCCTCCGTGATGGCTCTGTTCTTTTTAATGGA  
CTTTGGCGCCATGGCCCACTTTCCTTCTTGACAGCACTGGTCCCTGCTTAGAGC  
ATTCCTCTAGCTAACAAAGCAGTGTGTGGATGTGTGGGTGTGGGTGGCGATAC  
AGACCTCACTGGATGAGGACCGCCTCTCCCTGCAAGTTCACAGTCGGCAAAC  
TCCAGTGCTTGAAGTTCAGTCTACCCACCCCCCTCACCTCACGCCCCACTGC  
ACTGGTCAAGCCAGCAGGCCGCTACAGCCTGATCAGGTTAAGGCTGCTGGAG  
AGAAGGATGCGGACGGGAGCCAGTGACTCGTAGTGAATCCCCCTCCGCGCGGA  
GCTGGCCGGCGCTTCTTCCTGCGGGAAACCCCTGGGTGCCCAAGGCGGGGCC  
AGGCGGCGCGACAGTGGGGCAGGGCTTGCGGTGGGAGGGAGGCGGCTGAGG  
CGGAAGGACACACGAGGGCTGCTTCGCTGCACGCGAAAGTTTCAGCCAAACT  
TCGGGCGGCAGCTGGAGCGGCAGCCGAGGCAACAGACTCAGGGCGCAGGGA  
GTCGAGCATTTTACTTTTATGCTTCGGACCGTAGCGCCAGGGCCTGAGCGCAC  
TGAAGCAGGAGGAGGAGGTGGGGCTCCTCTATCCGGACCCCTCCCATGTGGAT  
CTGCCA **GGCGGCGGCGGCGGCGGCAGCAGCGGCGGCAGCGGCGGCGGCAG**  
**CGGCGGCGGCGGCGGCGGCGGCAGCAACGGCAACGGCAGCAGCAGCAG**  
**CGGCGGCGGCGGCGGCGGCGGCGGCGGCGGCGGCGGCGGCGGCGGCGGCG**  
**GCGGCGGCGGCAGCGGCGGCGGCAGCAGCTGACTACGGCAACGGCAGCGGC**  
**GGCGGCAGCGGCGGCGGCGGCGGCGGCGGCGGCGGCGGCGGCGGCGGCGGCGG**  
**GGCGGCGGCGGCGGCGGCGGCGGCGGCGGCGGCGGCGGCGGCGGCGGCGGCGG**  
**AGCAGCGGCAACGGCGGCGGCGGCGGCGGCGGCGGCGGCGGCGGCGGCGGCGG**  
**GGCGGC**

**F9-II:6-read 6**



GGGGTCATTTCTGAAGCCAAAGGAACAAAAGATACAGGGACAGAAACAGCAA  
GATATGTTTGAGGTCTCAAGTTGGCCATCACTGTTGTTGGCCTTGAGAAGTTCT  
ACAACAGGGGCAGGGAGGACAGAGATGGGGCCCAATGACGAAAAAGAGCCT  
TGTATGTACCATGTTTAAAATTTTATCCGAGTCAGGGAGTTTATGGTGGGTTTAT  
CCCAACAGAGTTATATTATGACTCCCATCCATTAGTCACACCTCCATTTTTTTTC  
TGTTTCTTTTAAACATTGTCTCAGATTCATTCCTTCAGGAAATCTACCTTATTCGT  
TTCAGGAGTCTTCTAGCAAGTTGTGCCTGGACTGTTACCCAGCCTCTTGTTG  
ACTGGTCCTGGGGCTCCAGTTCACCTCTTGCTCCCAACAATCAATTTTTCTACA  
GAACTATCAGAGCAATCTTCCTTTCCATCAATCTCAACTCTGTTTAAAAAACTT  
TCAATATTTTATCATGACCTAAGTAGCTGCCTCCCCACCCTTTCAGCTTGCCATT  
CAGAGGCTGCATAATTTGGTCCAGCACCGTCCTTGACTCCTCTCACTGCTAAC  
AGAGACAGAACTCATTACCTGCTGACTGCCTTTACTTTCTGGGCTGCTGGA  
ATGATAGCATCCATACTAATGTTGTTGTTCTTACTTTTAGCTCTTTTCTTAGC  
CCACTTGTACCCCGGTTTGATCACCCCTACTCTCTGCCTGGGAAGTAACTACTA  
TTCTGTTATAGTCTTAATATCTATATATATATATATCTATATATATGCATCCACAGAT  
AATGTGTAGTATTATCTTGAAAAATATACATAAATGGTATACTTTGTCTCCCTCTC  
GATTAGTTTTTCACTATCATTAGTTTTTAAAGATTTATCTATTGACATAAATAGCT  
ATGGTCTTTTCAATTACTGTGTTGCATTTCAATTTATAAATATAACCATAACATTGTTA  
CTAAATCCATTCTCTAAGGGTGAGCATTATGTTTTCAAGGTTTTTATTACACA  
GTGTTACTTGAATATCATATATGCTCACTTGTCTTATACAAATTTGCTGACCTTTC  
AAGATCCTCACTTTCATCCCAGCTCCTCTGGGAAAGCCTTCCCTGAATCCCAG  
CCCACAGCGGCAAAGTCTTGGCCTCAAGTTGCTTGTGCCATCTTGGTATCATCC  
CACTGCACCAAGCACACA ACTACATAAAGTAAGGCACTTAAAATATTAAGCTA  
CACGGATGAACAAATGAATGATGAATGAATAGGGCAGCACCACTTGTGATGGC  
TATTCCTTTTTGAACTTTGGCGCCTTAGCCCCACTTTCTGCTTCTTTGACAGCA  
CTGAATCCTACTCCAGAGCATTCTCCTTCTTGTA AACAGTGTGTGAGTGTG  
GCGGGTGTGGTGGCGATACAGACCTCACTGGATGAGGACCGCCTCTCTCCCTG  
CAAGTTCGGTGACAACTCCAGTGCTTGAAGTTCAGAGTCCTACCCACCCCT  
CACCTCCACGCCCTTACCAGGTCAAGCCAGCGAGCCGCCTGCAGCCCTGA  
TCCCAGGTTAGTACTGGAGAAGGATGCGGACAGCCTCCTGCAGGAAGCCTGG

GTGCCAAGGCAGCGAACCCGGGCCGCGAGCAGTGGGGCAGGGCTTGCAGTG  
GGAGGAGGCGGCTGAGGCAGGAAGGACACGGCTGCTTCGCTGCACACCCGA  
AAGTTCAATGCAGCTTCGGGCGGCGGCGCTGGGCGCGGCCGAGGCAGCAGAC  
TCAGGGCGCAGAGAGTCAAGGCGTTGCGCCTGTACTTCGGACCGTAGCGCGG  
TTCAGGCGCTGGCAGGAGGGAGGGAGAGAGTGAATCCTCTATCAGGACCCCC  
CCTCCCCATGTGGATCTGCCA **GGCGGGCGGCGGCACGGCGGCGGCAGCGGGCGG**  
**CAGCGGCGGCGGCGGCAGCAGCAGCAGCGGCGGCGGCGGCGGCGGCGGCGG**  
**CGGCGGCGGCGGCGGCAGCTGGCGGCAACGGCGCGGCGCAGCAACGGCGGC**  
**AGCAGCGGCGGCGGCGGCGGCGGCGGCGGCGGCAACGGCAGCGGCGGCAGCGGC**  
**GGCAGCAGCGGCGGCACGGCAACGGCGGCAACGGCGGCGGCGGCGGCGGCG**  
**CGGCGCGGCGCAACGGCGGCAACGGCAGCGGCAGCAGCGGCAGCGGCGGCG**  
**GCGACGCGGCGAAGCGGCGGCGGCGGCGGCGGCGGCGGCGGCGGCGGCGG**  
**GGCGGCGGCGGCGGCGGCGGCGGCGGCGGCGGTAACGGCAGAGGAGCCGGC**

**F9-II:6-read 7**

GCCAAAGGAACAAGATACAGGGACAGAAAACAGATATGTTTGGGGGAATTCC  
CTGGTTAGCCAATACTGTTATTGTGAAGTTCACAACAGGGGCAGGGAGGATAA  
GAGATAGCTCAATGACTAAAAAGGCCTTGTATGTACCATGTTTAGAAGTTTGAA  
TTTATCCTATAGGAGTCAGGGAAGAGGTTCTATGGGTAGGATTCATCCCAACA  
GGATTGTAAACCCCCACATCCAATTAGTCACACCTCCATTTTTTTTTTTCTGTTT  
CTAACATTGTCTCAGATTCATTCCTTCGAAATCTACCTTTATTAGTTCAGGTCT  
TAAATTTGTGCCTGACTGTTACCAACTCTGGATTGGTCCTGGGGCTCCAGTTC  
ACCCTTGCTCCCCAACAATCAATTTTCTACAGAACTATCAGAGCAATCTTCCTT  
CCATCAACAATCTCAACTCTGTCTGCAAAAATCTCAATAGTTTTATGTGACCT  
AAAGAGGTATTGCCTCTAATCTTTCAGCTTGCCATCTGTTGCATACAATTTGTCC  
CAACTCTTCGGCCCTTGACTCCTCTCACTGCTAACAGAGACAGAACTCATT  
ACTTACTCTTTGACTGTACCTTGCTTTCACGAGGGCTCTTCCTGGAATGATATG  
TCCATACAACTATTGTTGTTGTTCTTACTTTTTAGCTCTTTTCTTAGCCCACTTGT  
ACCCAGGTTTGATCACACCCTACCTCCTGCCCTGGAAGTAACTACTATTCTGG  
TTATAGTCTCTAATATCTATATCTATATCTATATATATATCCACAGATAATGTGTAGT  
ATTGTTCTTGAAAAATATACATAAATGGTATACTTGTCTCTGCGATTAGTTTTCA

CTATCATTAGTTTTTAAGATTGTCCTATTGACATAAATAGTTATAGTCTTTTTCAA  
TTATTGTGCCAGACATTTTCATATTTATAAATATAACCATAACATTATTCATCCATTCT  
CTAAGGGTGGGCATTTGTGTTGCTTTCAAGGTTTGCTATTACAGTGTTACAAC  
AATATCCTTAGCTTAGCTGGTCTCCTTGTCTTATACAAATTTTATTGACCTTTCA  
AGATCCTGCTTTATCCCAGCTCCTGGGAAAGCTCTTCCTGAATCCCCAGCCCA  
CAGCGGTAAAGTCTGGTACTCAAAGTTGCTTTGCATCTTTTGGTATCATCCCAC  
TGCCAAGCACACAGCTACGCAAAGTAAGGCACTTAAGAAATATTCGCTACACG  
ATGAACAAATGAATGAATGAATGGGGCAAAAAGCACCCACCTGTGATGCCTTAT  
CTCCTTTTAATGGACTTGGCGTGCCTTGGCCCACTTTTCCTTCTTTTGAATAGC  
ACTGGTCCTACTCAGGAGCATTCTCTAGCTAGCAAAGCAGTGTGTGATGTGG  
GTGTAGGTGGTGACACAGATCTCACTGGATGAGACCGCCTCCCTGCAAGTTCA  
CGATCCTGGCAACCCAGTGCTTGAAGTTCAGGGAGTCCTACCCACCCCTCAC  
CTCCACGCCCTTCTGCACTGGTCAAGCCAGCGGGAGCTGCAGCCCTGATCGA  
GTTAAGGCTGCTGGAGAAGCATGCGGACGGGCCAGTGGACTGTAGTAGATCC  
CTCCGCGCGGGAGCCTGGGCCGGCGCTTCTTCCTGCGGGAAACCCCTGGTGC  
CTGCAAGGCGGTGGGGGAAGGGGAGGCCGCGGCGACAGTGGGGCGGGGCTT  
GCGGTGGGAGTGAGGCGGCTGAGGAAGGACACACGAGGTTGCTTGCTGCAC  
ACCTGAGAAAGTTTCAGCTAAACTTCGGGCGGCATGAGGCGGCGGCCGAGGA  
GCGGCGGACTCTGGGCGCGTGGGGAGTCGAGGCATTTGCGCCTGTGCTGACC  
AGCGCTAGGGCCTGTTTTGAAGCAGGAGGAGGGAGGAGAGAGTGGGGTTTTA  
TCGGGACTCCCCTGGCGATTTACCA **GGCGGTAAGGGTGGTGGTGGCGGTGGT**  
**GGCGGTGGCGGTGGTGGTGGTGGCGGTGGTGGCGGTGGTGGTGGCGGTGGCG**  
**GTGGTGGCGGTGGCGGGTGGGTGGTGGCGGCGGGTGGCGGTGGTGGTGGTGGT**  
**GTGGTGGCGGTGGTGGTGGCGGCGGGTGGTGGCGGCGGTGGCGGTGGTGGTGGT**  
**GTGGCGGCGGCGGCGGTGGTGGCGGGTGGCGGCGGCGGCGGCGGCGGCGGCGGG**  
**TGGTGGCGGCGGCGGCGGCGGTGGCGGCGGTGGCGGCGGCGGCGGCGGCGGCGG**  
**GTGGCGGCGGCGGTGGCGGCGGCGGCGGCGGCGGCGGCGGCGGCGGCGGCGGAG**  
**GAGGCGGC**

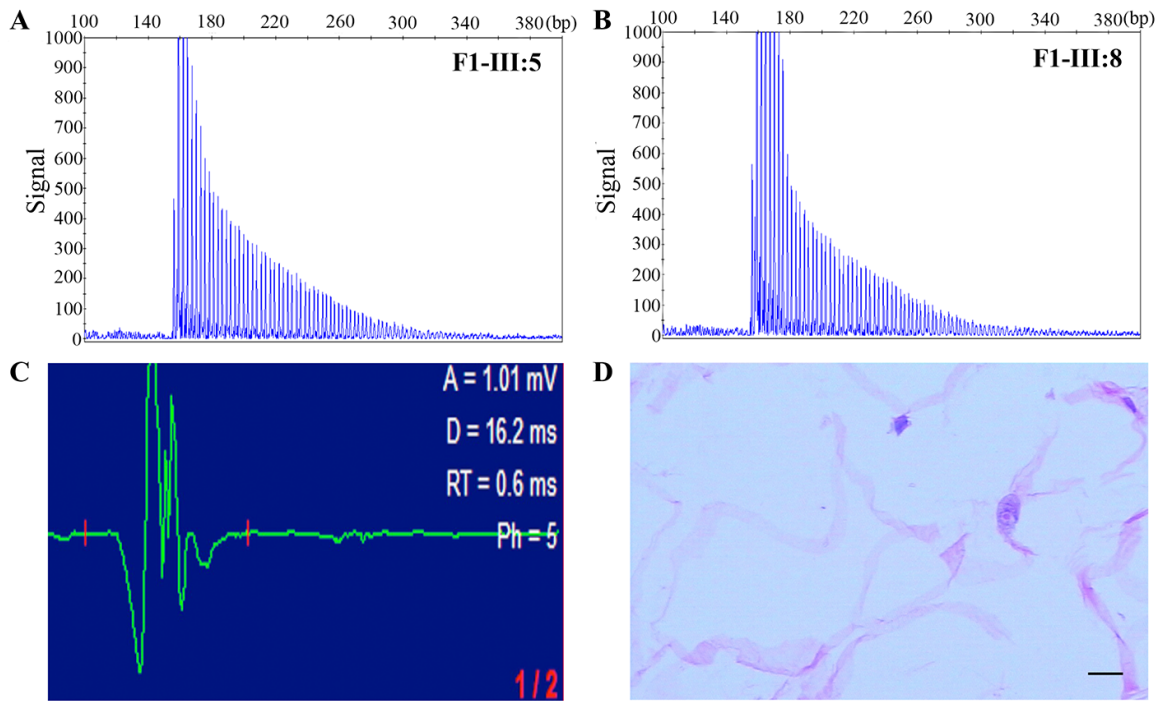

**Figure S2. Additional Molecular and Clinical Diagnosis of Family 1.** (A-B) RP-PCR assay and GC-PCR assay showed abnormal repeat expansion in subject F1-III:5 (A) and F1-III:8 (B). (C) Representative motor unit potential (MUP) of right tibialis anterior from electromyogram of subject F1-III:8 indicated neurogenic impairment. (D) Skin biopsy sample of subject F1-III:8 displayed typical eosinophilic intranuclear inclusions. Scale bars, 10 $\mu$ m.

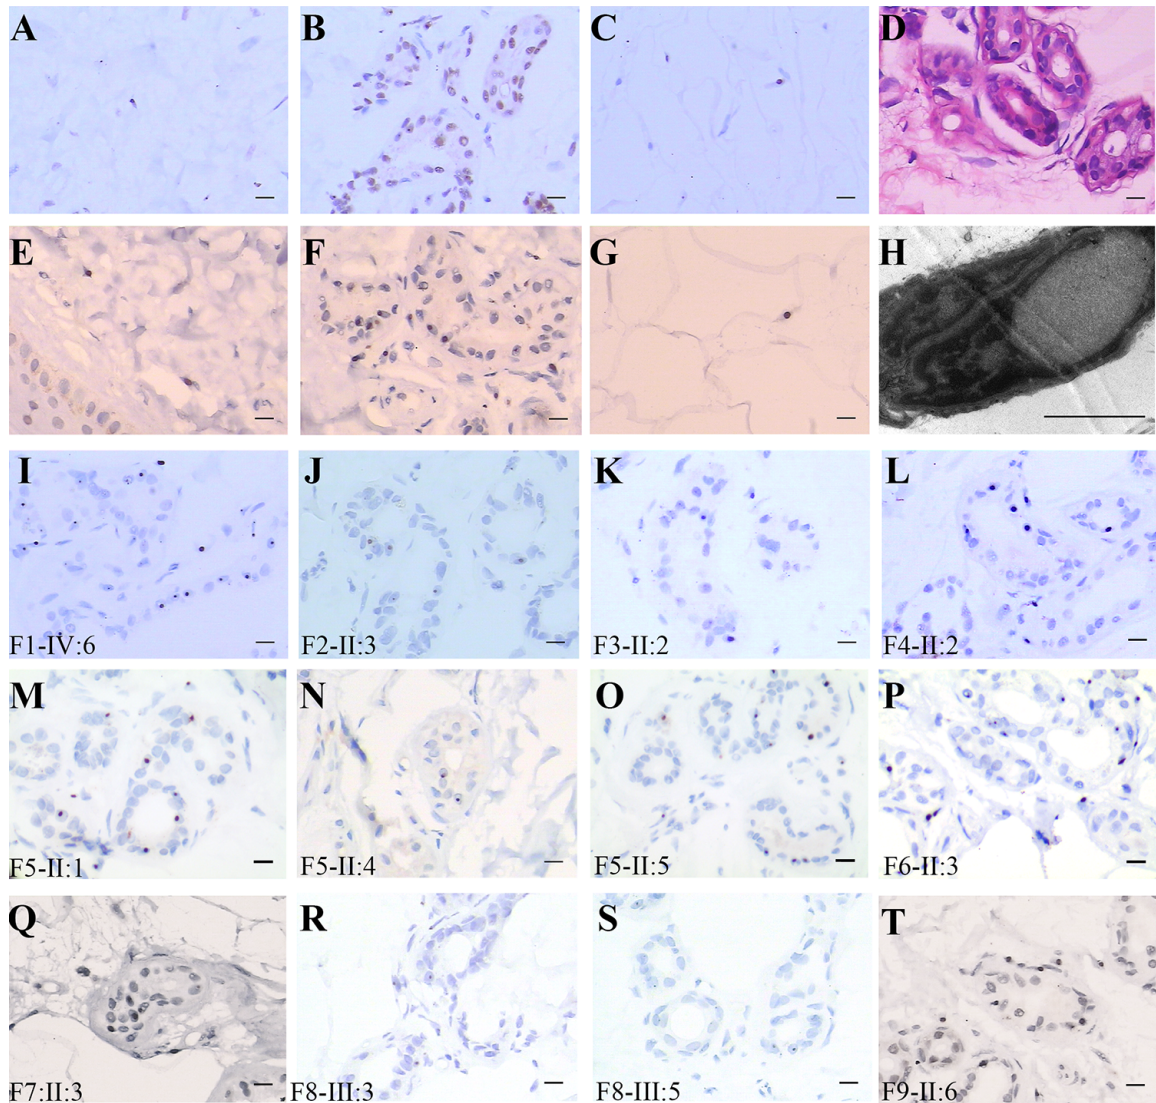

**Figure S3. Histopathological Features of NIID.** (A-C) Representative skin biopsy samples showing ubiquitin-positive intranuclear inclusions in fibroblasts (A), sweat gland cells (B), and adipocytes (C). Scale bars, 10 $\mu$ m. (D) Representative skin biopsy samples revealed eosinophilic intranuclear inclusions in sweat gland cells. Scale bars, 10 $\mu$ m. (E-G) Representative skin biopsy samples indicated p62-positive intranuclear inclusions in fibroblasts (E), sweat gland cells (F), and adipocytes (G). Scale bars, 10 $\mu$ m. (H) Electron microscopy imaging displaying intranuclear inclusions without membrane. Scale bars, 2 $\mu$ m. (I-T) All skin samples showed p62-positive intranuclear inclusions. Scale bars, 10 $\mu$ m.

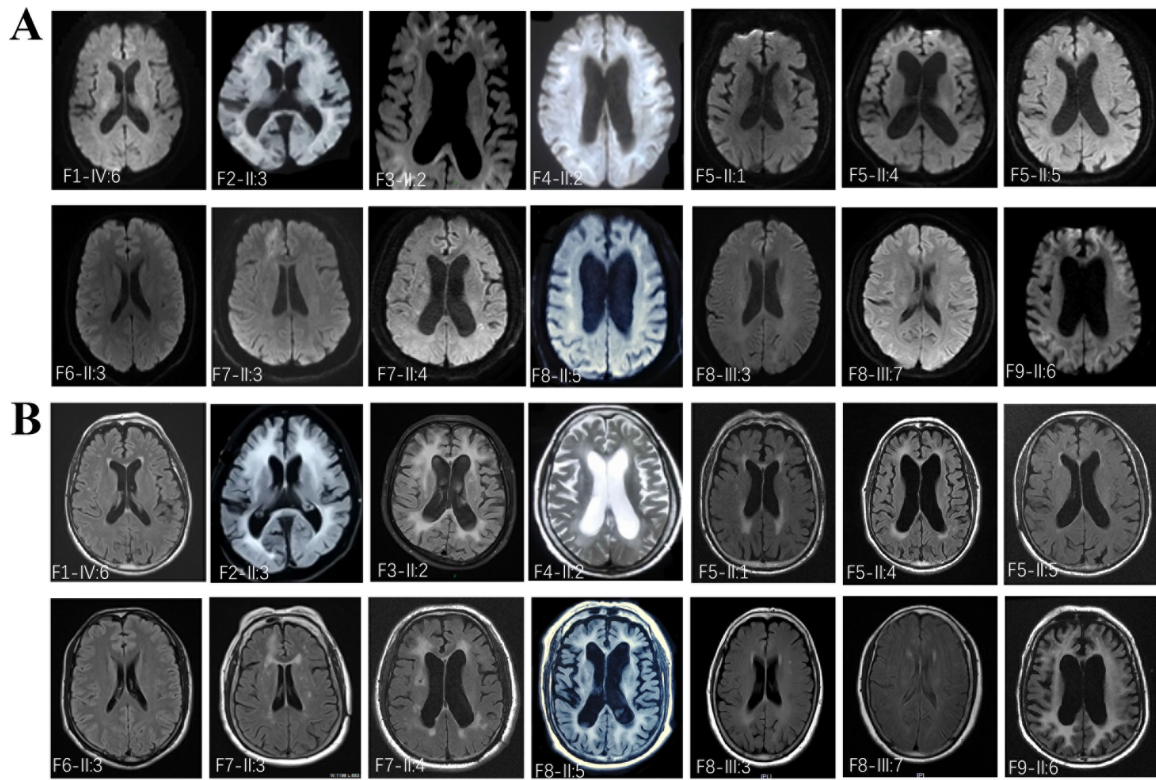

**Figure S4. MRI Imaging of NIID.** (A) DWI images of some NIID-affected case subjects revealed typical symmetrical high signal in corticomedullary junction. (B) Several NIID-affected case subjects showed severe white matter hyperintensity using FLAIR or T2 weighted image.



**Table S2. Clinical Features of Parkinsonism-dominant Type (families 5-7)**

|                                   | Family 5 |      |      | Family 6 |      |      | Family 7 |      |      |
|-----------------------------------|----------|------|------|----------|------|------|----------|------|------|
|                                   | II:1     | II:4 | II:5 | I:1      | II:2 | II:3 | I:1      | II:3 | II:4 |
| Sex                               | M        | M    | M    | M        | M    | M    | M        | F    | M    |
| Age at onset                      | 75       | 58   | 66   | 78       | 37   | 46   | 58       | 66   | 61   |
| Disease duration                  | 2        | 11   | 2    | 1        | 15   | 3    | 10       | 6    | 4    |
| Clinical manifestations           |          |      |      |          |      |      |          |      |      |
| Dementia                          | -        | -    | -    | -        | -    | -    | -        | -    | -    |
| Abnormal behavior                 | -        | -    | -    | -        | -    | -    | -        | -    | -    |
| Peripheral neuropathy             |          |      |      |          |      |      |          |      |      |
| Muscle weakness                   | -        | +    | -    | -        | -    | -    | -        | -    | -    |
| Sensory disturbance               | +        | -    | -    | +        | -    | -    | -        | +    | +    |
| Autonomic dysfunction             |          |      |      |          |      |      |          |      |      |
| Bladder dysfunction               | -        | ++   | -    | -        | -    | +    | +++      | ++   | +++  |
| Miosis                            | -        | -    | -    | -        | -    | -    | /        | -    | -    |
| Parkinsonism                      |          |      |      |          |      |      |          |      |      |
| Tremor                            | +        | ++   | -    | -        | +    | -    | -        | +    | +    |
| Rigidity                          | +        | ++   | +    | +        | +    | +    | +        | ++   | +    |
| Bradykinesia                      | +        | ++   | +    | +        | +    | ++   | +        | ++   | +    |
| Ataxia                            | -        | +    | -    | -        | -    | -    | ++       | +    | ++   |
| Neurological attack               |          |      |      |          |      |      | -        |      |      |
| Disturbance of consciousness      | -        | +    | -    | -        | -    | -    | -        | -    | -    |
| Stroke-like episode               | -        | +    | +    | -        | -    | -    | -        | -    | -    |
| encephalitic episode              | -        | -    | -    | -        | -    | -    | -        | -    | -    |
| Brain MRI                         |          |      |      |          |      |      |          |      |      |
| Severe leukoencephalopathy        | -        | +    | -    | /        | /    | -    | /        | -    | +    |
| DWI U-fiber high signal           | -        | +    | -    | /        | /    | -    | /        | -    | -    |
| Cognitive function test           |          |      |      |          |      |      |          |      |      |
| MMSE (<education matched average) | 26       | 27   | 26   | /        | 29   | 30   | /        | 22   | 25   |
| MoCA (<education matched average) | 19       | 15   | 19   | /        | /    | 25   | /        | /    | 23   |
| Nerve conduction                  |          |      |      |          |      |      |          |      |      |
| Motor                             |          |      |      |          |      |      |          |      |      |
| MCV slowing                       | +        | +    | +    | /        | /    | +    | /        | ++   | +    |
| CMAP reduction                    | +        | -    | -    | /        | /    | -    | /        | -    | +    |
| Sensory                           |          |      |      |          |      |      |          |      |      |
| SCV slowing                       | +        | -    | -    | /        | /    | -    | /        | ++   | +    |
| SNAP reduction                    | -        | -    | -    | /        | /    | -    | /        | +    | +    |
| Skin biopsy                       | +        | +    | +    | /        | /    | +    | /        | +    | /    |



**Table S3. Clinical Features of Dementia-dominant Type (families 3, 4, 8, 9)**

|                                   | Family 3 |      |      | Family 4 |      | Family 8 |      |      | Family 9 |       |       |       |     |      |      |      |
|-----------------------------------|----------|------|------|----------|------|----------|------|------|----------|-------|-------|-------|-----|------|------|------|
|                                   | I:2      | II:2 | II:3 | II:2     | II:5 | I:1      | II:3 | II:5 | II:8     | III:3 | III:5 | III:7 | I:2 | II:2 | II:3 | II:6 |
| Sex                               | F        | M    | F    | F        | F    | M        | F    | M    | M        | F     | F     | F     | F   | M    | F    | M    |
| Age at onset                      | 71       | 42   | 63   | 49       | 31   | 65       | 60   | 60   | 60       | 60    | 58    | 59    | 60  | 60   | 60   | 71   |
| Disease duration                  | 20       | 19   | 2    | 18       | 30   | 5        | 8    | 19   | 16       | 7     | 5     | 3     | 15  | 10   | 12   | 10   |
| Clinical manifestations           |          |      |      |          |      |          |      |      |          |       |       |       |     |      |      |      |
| Dementia                          | ++       | -    | +    | +        | ++   | +++      | +++  | +++  | +++      | ++    | +     | -     | ++  | ++   | ++   | +++  |
| Abnormal behavior                 | ++       | ++   | +    | ++       | +++  | ++       | ++   | ++   | ++       | -     | -     | -     | ++  | ++   | ++   | +    |
| Peripheral neuropathy             |          |      |      |          |      |          |      |      |          |       |       |       |     |      |      |      |
| Muscle weakness                   | -        | -    | +    | -        | -    | /        | -    | +    | -        | -     | -     | +     | -   | -    | -    | +    |
| Sensory disturbance               | +        | -    | +    | -        | -    | /        | -    | +    | -        | -     | +     | +     | -   | -    | -    | -    |
| Autonomic dysfunction             |          |      |      |          |      |          |      |      |          |       |       |       |     |      |      |      |
| Bladder dysfunction               | +        | -    | ++   | ++       | -    | +        | +++  | +++  | +++      | -     | ++    | +++   | /   | +++  | +++  | +++  |
| Miosis                            | -        | -    | -    | +        | +    | /        | /    | +    | /        | -     | -     | -     | /   | /    | /    | +    |
| Parkinsonism                      |          |      |      |          |      |          |      |      |          |       |       |       |     |      |      |      |
| Tremor                            | -        | -    | -    | +        | -    | -        | -    | +    | -        | -     | -     | -     | -   | -    | -    | +    |
| Rigidity                          | -        | -    | -    | ++       | -    | -        | -    | -    | -        | -     | -     | -     | -   | -    | -    | +    |
| Bradykinesia                      | -        | -    | -    | +        | -    | -        | -    | -    | -        | -     | -     | -     | -   | -    | -    | +    |
| Ataxia                            | +        | -    | -    | -        | -    | -        | -    | -    | -        | -     | -     | -     | -   | -    | -    | -    |
| Neurological attack               |          |      |      |          |      |          |      |      |          |       |       |       |     |      |      |      |
| Disturbance of consciousness      | -        | -    | -    | +        | -    | -        | -    | -    | -        | -     | +     | -     | -   | -    | -    | +    |
| Stroke-like episode               | -        | -    | -    | +        | -    | -        | -    | -    | -        | -     | -     | -     | -   | -    | -    | -    |
| encephalitic episode              | -        | -    | -    | -        | -    | -        | -    | -    | -        | -     | -     | -     | -   | -    | -    | +    |
| Brain MRI                         |          |      |      |          |      |          |      |      |          |       |       |       |     |      |      |      |
| Severe leukoencephalopathy        | /        | /    | +    | +        | /    | /        | /    | +    | /        | -     | -     | -     | /   | /    | /    | +    |
| DWI U-fiber high signal           | /        | /    | +    | +        | /    | /        | /    | +    | /        | -     | -     | -     | /   | /    | /    | +    |
| Cognitive function test           |          |      |      |          |      |          |      |      |          |       |       |       |     |      |      |      |
| MMSE (<education matched average) | 14       | 29   | /    | 15       | 12   | /        | /    | /    | /        | 10    | 26    | 29    | /   | /    | /    | /    |
| MoCA (<education matched average) | /        | 28   | /    | /        | /    | /        | /    | /    | /        | 3     | 20    | 26    | /   | /    | /    | /    |
| Nerve conduction                  |          |      |      |          |      |          |      |      |          |       |       |       |     |      |      |      |
| Motor                             |          |      |      |          |      |          |      |      |          |       |       |       |     |      |      |      |
| MCV slowing                       | /        | +    | /    | -        | /    | /        | /    | +    | /        | -     | +     | +     | /   | /    | /    | ++   |
| CMAP reduction                    | /        | +    | /    | -        | /    | /        | /    | +    | /        | -     | +     | +     | /   | /    |      | ++   |
| Sensory                           |          |      |      |          |      |          |      |      |          |       |       |       |     |      |      |      |
| SCV slowing                       | /        | +    | /    | -        | /    | /        | /    | +    | /        | -     | +     | +     | /   | /    | /    | +    |
| SNAP reduction                    | /        | +    | /    | -        | /    | /        | /    | +    | /        | -     | +     | +     | /   | /    | /    | +    |
| Skin biopsy                       | /        | +    | /    | +        | /    | /        | /    | /    | /        | +     | +     | +     | /   | /    | /    | +    |

**Table S4. Clinical Features of Sporadic NIID-affected Case Subjects**

|                                   | Sporadic Case Subjects |     |                    |     |     |
|-----------------------------------|------------------------|-----|--------------------|-----|-----|
|                                   | Dementia               |     | Paroxysmal disease |     |     |
|                                   | SD1                    | SD2 | SP1                | SP2 | SP3 |
| Sex                               | F                      | F   | M                  | M   | F   |
| Age at onset                      | 65                     | 69  | 68                 | 51  | 57  |
| Disease duration                  | 14                     | 2   | 1                  | 5   | 6   |
| Clinical manifestations           |                        |     |                    |     |     |
| Dementia                          | ++                     | ++  | -                  | -   | -   |
| Abnormal behavior                 | ++                     | +   | -                  | -   | -   |
| Peripheral neuropathy             |                        |     |                    |     |     |
| Muscle weakness                   | -                      | -   | -                  | -   | -   |
| Sensory disturbance               | -                      | -   | -                  | -   | -   |
| Autonomic dysfunction             |                        |     |                    |     |     |
| Bladder dysfunction               | +++                    | +++ | -                  | ++  | -   |
| Miosis                            | +                      | +   | -                  | -   | -   |
| Parkinsonism                      |                        |     |                    |     |     |
| Tremor                            | +                      | -   | -                  | -   | -   |
| Rigidity                          | +                      | -   | -                  | -   | -   |
| Bradykinesia                      | +                      | -   | -                  | -   | -   |
| Ataxia                            | -                      | -   | -                  | -   | -   |
| Neurological attack               |                        |     |                    |     |     |
| Disturbance of consciousness      | +                      | +   | +                  | +   | -   |
| Stroke-like episode               | +                      | +   | +                  | -   | +   |
| encephalitic episode              | +                      | +   | -                  | -   | +   |
| Brain MRI                         |                        |     |                    |     |     |
| Severe leukoencephalopathy        | +                      | +   | +                  | +   | +   |
| DWI U-fiber high signal           | +                      | +   | +                  | +   | +   |
| Cognitive function test           |                        |     |                    |     |     |
| MMSE (<education matched average) | /                      | /   | 27                 | 30  | /   |
| MoCA (<education matched average) | /                      | /   | 16                 | 29  | /   |
| Nerve conduction                  |                        |     |                    |     |     |
| Motor                             |                        |     |                    |     |     |
| MCV slowing                       | +                      | /   | +                  | +   | /   |
| CMAP reduction                    | +                      | /   | -                  | -   | /   |
| Sensory                           |                        |     |                    |     |     |
| SCV slowing                       | +                      | /   | +                  | +   | /   |
| SNAP reduction                    | +                      | /   | -                  | -   | /   |
| Skin biopsy                       | +                      | +   | +                  | +   | +   |
