# Supplementary material for: Expansion of Human-Specific GGC Repeat in Neuronal Intranuclear Inclusion Disease-Related Disorders
Source: PubMed Central journal article supplement (PMC6612530; doi:10.1016/j.ajhg.2019.05.013), 2019-06-06
Supplement: mmc2.pdf [file mmc2.pdf]

# Expansion of Human-Specific GGC Repeat in Neuronal Intranuclear Inclusion Disease-Related Disorders

Yun Tian,<sup>1,3,14</sup> Jun-Ling Wang,<sup>2,14</sup> Wen Huang,<sup>4</sup> Sheng Zeng,<sup>2</sup> Bin Jiao,<sup>2</sup> Zhen Liu,<sup>2</sup> Zhao Chen,<sup>2</sup> Yujing Li,<sup>5</sup> Ying Wang,<sup>6</sup> Hao-Xuan Min,<sup>7</sup> Xue-Jing Wang,<sup>8</sup> Yong You,<sup>9</sup> Ru-Xu Zhang,<sup>10</sup> Xiao-Yu Chen,<sup>11</sup> Fang Yi,<sup>1</sup> Ya-Fang Zhou,<sup>1</sup> Hong-Yu Long,<sup>2</sup> Chao-Jun Zhou,<sup>2</sup> Xuan Hou,<sup>2</sup> Jun-Pu Wang,<sup>6</sup> Bin Xie,<sup>6</sup> Fan Liang,<sup>7</sup> Zhuan-Yi Yang,<sup>11</sup> Qi-Ying Sun,<sup>1</sup> Emily G. Allen,<sup>5</sup> Andrew Mark Shafik,<sup>5</sup> Ha Eun Kong,<sup>5</sup> Ji-Feng Guo,<sup>2</sup> Xin-Xiang Yan,<sup>2</sup> Zheng-Mao Hu,<sup>4,12</sup> Kun Xia,<sup>4,12</sup> Hong Jiang,<sup>2,13</sup> Hong-Wei Xu,<sup>1</sup> Ran-Hui Duan,<sup>4,12</sup> Peng Jin,<sup>5,15,\*</sup> Bei-Sha Tang,<sup>1,2,3,15</sup> and Lu Shen<sup>2,3,15,\*</sup>

Neuronal intranuclear inclusion disease (NIID) is a slowly progressing neurodegenerative disease characterized by eosinophilic intranuclear inclusions in the nervous system and multiple visceral organs. The clinical manifestation of NIID varies widely, and both familial and sporadic cases have been reported. Here we have performed genetic linkage analysis and mapped the disease locus to 1p13.3-q23.1; however, whole-exome sequencing revealed no potential disease-causing mutations. We then performed long-read genome sequencing and identified a large GGC repeat expansion within human-specific *NOTCH2NLC*. Expanded GGC repeats as the cause of NIID was further confirmed in an additional three NIID-affected families as well as five sporadic NIID-affected case subjects. Moreover, given the clinical heterogeneity of NIID, we examined the size of the GGC repeat among 456 families with a variety of neurological conditions with the known pathogenic genes excluded. Surprisingly, GGC repeat expansion was observed in two Alzheimer disease (AD)-affected families and three parkinsonism-affected families, implicating that the GGC repeat expansions in *NOTCH2NLC* could also contribute to the pathogenesis of both AD and PD. Therefore, we suggest defining a term NIID-related disorders (NIIDRD), which will include NIID and other related neurodegenerative diseases caused by the expanded GGC repeat within human-specific *NOTCH2NLC*.

## Introduction

Neuronal intranuclear inclusion disease (NIID [MIM: 603472]) is a rare multisystem neurodegenerative disease characterized by the pathology of eosinophilic intranuclear inclusions in the central, peripheral, and autonomic nervous systems, as well as in the visceral organs.<sup>1,2</sup> The first NIID-affected case subject was reported in 1968.<sup>3</sup> However, until 2011, only about 40 NIID-affected case subjects had been described worldwide, which were diagnosed by post-mortem brain biopsy.<sup>1,4–13</sup> Because eosinophilic intranuclear inclusions also exist in dermal cells of NIID-affected individuals,<sup>14,15</sup> skin biopsy has become a useful tool to confirm NIID diagnosis, and the number of reported cases has increased to more than 100 case subjects.<sup>2</sup>

Both familial and sporadic case subjects have been described.<sup>2</sup> The onset age of NIID varies widely and can

be divided into three subgroups according to the age of onset: infant form, juvenile form, and adult form.<sup>1</sup> The clinical manifestation of adult-onset NIID can vary widely, including dementia,<sup>9,16</sup> peripheral neuropathy,<sup>5,17</sup> autonomic dysfunction,<sup>17,18</sup> cerebellar ataxia,<sup>7,8</sup> parkinsonism,<sup>4,19,20</sup> seizure,<sup>21</sup> stroke-like episodes,<sup>22</sup> disturbance of consciousness,<sup>21</sup> and encephalitic episodes.<sup>4</sup> Dementia is the most prominent symptom in sporadic NIID-affected case subjects. In familial NIID-affected case subjects, based on the initial and main symptoms, a subgrouping of adult-onset NIID-affected case subjects was suggested based on dementia-dominant and limb weakness-dominant phenotypes.<sup>2</sup> Considering the wide range in distribution of intranuclear inclusions in the nervous system and other organs, it is possible that there are additional phenotypes of NIID. The typical symmetrical high signal seen in corticomedullary junctions using diffusion weighted imaging (DWI) could be a powerful tool for screening NIID-affected case

<sup>1</sup>Department of Geriatrics, Xiangya Hospital, Central South University, Changsha, Hunan 410008, China; <sup>2</sup>Department of Neurology, Xiangya Hospital, Central South University, Changsha, Hunan 410008, China; <sup>3</sup>National Clinical Research Center for Geriatric Disorders, Xiangya Hospital, Central South University, Changsha, Hunan 410008, China; <sup>4</sup>Center for Medical Genetics, School of Life Sciences, Central South University, Changsha, Hunan 410008, China; <sup>5</sup>Department of Human Genetics, Emory University School of Medicine, Whitehead Research Building, Room 305A, 615 Michael Street, Atlanta, GA 30322, USA; <sup>6</sup>Department of Pathology, Xiangya Hospital, Central South University, Changsha, Hunan 410008, China; <sup>7</sup>GrandOmics Biosciences, Beijing 100000, China; <sup>8</sup>Department of Neurology, The First Affiliated Hospital of Zhengzhou University, Zhengzhou, Henan 450052, China; <sup>9</sup>Department of Neurology, The First Affiliated Hospital of University of South China, Hengyang, Hunan 421000, China; <sup>10</sup>Department of Neurology, The Third Xiangya Hospital, Central South University, Changsha, Hunan 410008, China; <sup>11</sup>Department of Neurosurgery, Xiangya Hospital, Central South University, Changsha, Hunan 410008, China; <sup>12</sup>Hunan Key Laboratory of Medical Genetics, Central South University, Changsha, Hunan 410008, China; <sup>13</sup>Key Laboratory of Hunan Province in Neurodegenerative Disorders, Central South University, Changsha, Hunan 410008, China

<sup>14</sup>These authors contributed equally to this work

<sup>15</sup>These authors contributed equally to this work

\*Correspondence: shenlu@csu.edu.cn (L.S.), peng.jin@emory.edu (P.J.)

<https://doi.org/10.1016/j.ajhg.2019.05.013>

© 2019 The Author(s). This is an open access article under the CC BY license (<http://creativecommons.org/licenses/by/4.0/>).

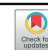

subjects.<sup>2,15,23,24</sup> In addition, almost all dementia-dominant NIID-affected case subjects and about 40% of limb weakness-dominant NIID-affected case subjects have been seen to have remarkable leukoencephalopathy on fluid-attenuated inversion recovery (FLAIR) images and T2-weighted (T2) images, suggesting that severe white matter hyperintensity may also be an indicator for NIID.<sup>2,15</sup>

The pathogenesis of NIID remains unknown. Immunohistochemically, the intranuclear inclusions are positive for ubiquitin and ubiquitin related proteins, including p62, SUMO1, FUS, MYO6, and OPTN-C proteins,<sup>5,12,13,25,26</sup> indicating that the ubiquitin-proteasome system in the nucleus may play a role in NIID. In addition, some intranuclear inclusions were found to stain positive for an anti-polyglutamine antibody 1C2<sup>4,13</sup> and also with an anti-ataxin3 antibody.<sup>11,27</sup> However, this could be the result of a cross-reaction. No CAG repeat expansions have been observed in NIID.<sup>27</sup>

Here we report the identification of an expanded GGC repeat in *NOTCH2NLC* (MIM: 618025) via long-read genome sequencing (LRS) in a five-generation Chinese Han NIID family, and the repeat expansions were validated by repeat-primed PCR (RP-PCR) and GC-rich PCR (GC-PCR) in three additional NIID-affected families as well as five sporadic NIID-affected case subjects. In addition, we found two Alzheimer disease (AD)-affected families (1.43%) and three parkinsonism-affected families (1.46%), with GGC expansions in *NOTCH2NLC* from a cohort that included 140 AD-affected families, 205 parkinsonism-affected families, 51 spinocerebellar ataxia (SCA)-affected families, 16 peripheral neuropathy-affected families, and 44 motor neuron disease (MND)-affected families. Further, skin biopsies confirmed the typical NIID pathology in these two AD-affected families and three parkinsonism-affected families, indicating that GGC repeat expansions could also contribute to AD and PD phenotypes. Thus, we suggest defining a term of NIID-related disorders (NIIDRD), which is a spectrum of diseases including NIID and other diseases caused by the GGC repeat expansions of *NOTCH2NLC*. The prevalence of NIIDRD is not rare, and screening for expanded GGC repeat within *NOTCH2NLC* should be done not only in dementia-affected and peripheral neuropathy-affected individuals, but also in parkinsonism-affected individuals.

## Material and Methods

### Study Participants

Twenty affected individuals from four NIID-affected families, five sporadic NIID-affected case subjects, and 211 healthy control subjects from mainland China were recruited for this study. All NIID-affected individuals were recruited from the National Clinical Research Center for Geriatric Disorders, Xiangya Hospital, and subjected to a thorough neurological examination by at least two experienced neurologists. We defined familial NIID-affected case subjects as having at least one NIID-affected case subject diagnosed by skin biopsy, and the additional family member(s) had to

have either high signal intensity in the corticomedullary junction using DWI or a clinical examination by a neurologist that confirmed the concordance of phenotype with the pathologically diagnosed NIID individual from the same family. All sporadic NIID-affected case subjects presented with typical high intensity in corticomedullary junction in DWI and received a skin biopsy to confirm the diagnosis. All healthy control subjects were recruited from the medical examination center of Xiangya hospital.

Besides NIID cohorts, a cohort of individuals with other neurodegenerative disorders were also recruited, including 140 AD-affected families, 205 parkinsonism-affected families, 51 SCA-affected families, 16 peripheral neuropathy-affected families, and 44 MND-affected families, of which the known pathologic genes had been excluded. All individuals were recruited from the Department of Neurology and National Clinical Research Center for Geriatric Disorders, Xiangya Hospital. All participants were subjected to a thorough neurological examination by at least two experienced neurologists.

This study was approved by the Ethics Committee of Xiangya Hospital of the Central South University in China. Written informed consent was obtained from all individuals.

### Skin Biopsy, Immunohistochemistry, and Electron Microscopy

Skin biopsies were performed after local anesthesia. A 5-mm-diameter biopsy specimen was obtained at 10 cm above the lateral malleolus of the affected individual. For immunohistochemistry, all samples were fixed in 10% formalin and then were embedded in paraffin and sectioned at 6 mm thickness. Sections of all samples were stained by hematoxylin & eosin (H&E) and immunohistochemical analysis was performed. Anti-ubiquitin (3936; Cell Signaling) and anti-p62 (610833; BD Biosciences) antibodies were used for ubiquitin and p62 staining. Images were acquired by deconvolution digital microscope (Axioplan 2; Carl Zeiss).

Samples for electron microscopy were sliced into 1×1×3 mm<sup>3</sup> size and fixed in 2.5% glutaraldehyde solution with Millonig's phosphate buffer (pH 7.3). In the following preparations, the samples were incubated in 1% osmium tetroxide, then dehydrated with graded acetone, and embedded with resin. 50–100 nm ultrathin sections were prepared with an ultramicrotome (Leica Microsystems) and a diamond knife. After 3% uranyl acetate and lead nitrate double staining, prepared sections were examined and photographed on a Hitachi HT-7700 electron microscope.

### Linkage Analysis and Whole-Exome Sequencing

Whole-genome SNP scanning on selected members in family 1 (Figure 1A) was performed using Illumina Asian Screening Array with more than 7 million polymorphic loci. Information on SNPs was extracted by the genotyping module of Genomestudio (v.2011.1). Illumina cnvPartition CNV Analysis Plug-in of Genomestudio (v.2011.1) was used for copy number variations (CNVs) analysis. Linkage analysis was performed by the parametric linkage analysis package of MERLIN (v.1.1.2). Whole-exome sequencing (WES) and analysis for the three affected individuals (F1-IV:1, F1-IV:6, and F1-IV:10) and one unaffected individual (F1-IV:3) were used to detect potential causal single nucleotide variants (SNVs) and InDels (insertions and deletions) in the mapping region. Sequencing data were subjected to quality control (QC). This was followed by Burrows-Wheeler Alignment Maximal Exact Matches (BWA-MEM) for read mapping, Samtools for SNV/InDel calling, ANNOVAR for variant annotation, and all

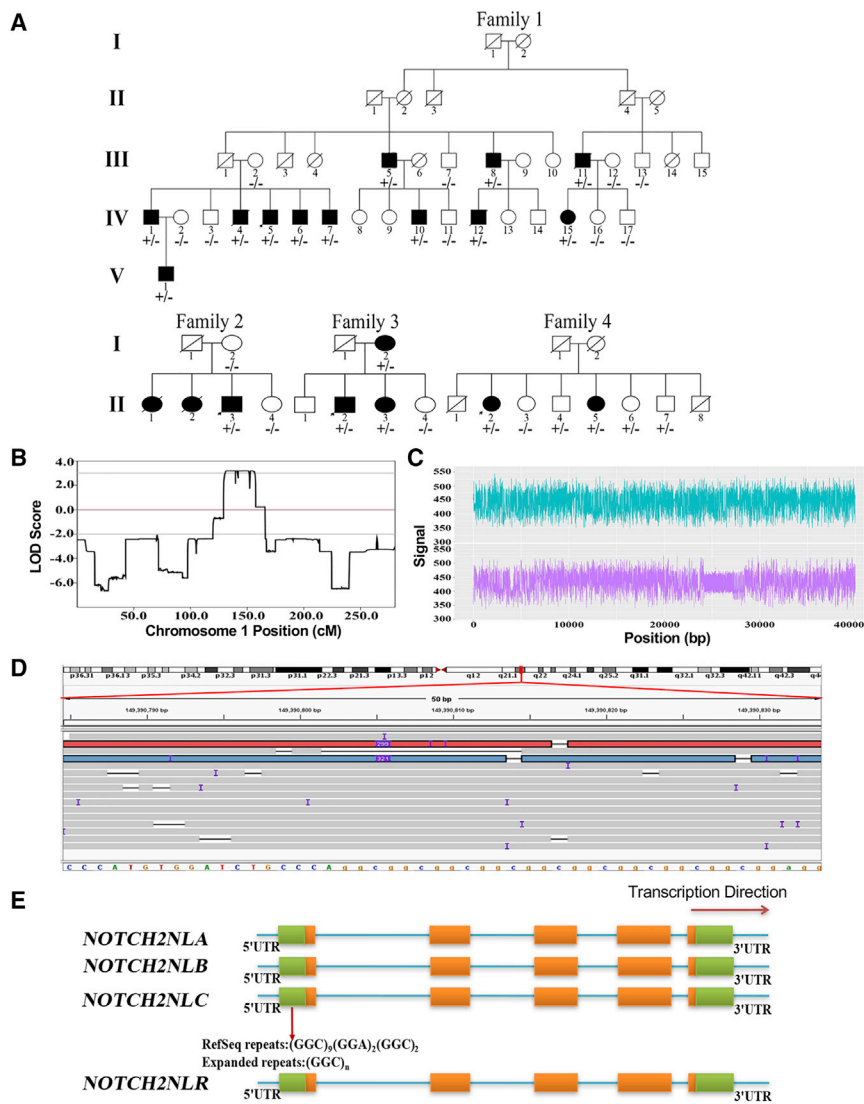

**Figure 1. Identification of Expanded GGC Repeat within *NOTCH2NLC* in Neuronal Intranuclear Inclusion Disease**

(A) Pedigrees of neuronal intranuclear inclusion disease (NIID)-affected families and corresponding individual genotypes. (B) Genetic linkage analysis indicated maximum logarithm of odds (LOD) scores 3.184 in chromosome 1, a 49.8-Mb region at 1p13.3-q23.1 (chr1:109260034-159016186). (C and D) GGC expansions detected by LRS. Nanopore electric signal (C) from subject F1-IV:15 indicated GGC expansions in the lower lane compared to the normal allele in the upper lane. More than ten reads covering the causative region were seen in the Integrative Genomics Viewer for subject F1-IV:15. Two reads were determined to carry the “insertion” variation (chr1:149390803-149390842, hg38 version), corresponding to the GGC triplet expansion in *NOTCH2NLC* (D). (E) Schematic representation of the causal variant in *NOTCH2NLC*: a certain number of GGC triplets exist in 5' UTR of *NOTCH2NLC* in healthy individuals, and large expanded GGC triplets are present in affected individuals.

phate (deaza-dGTP) was used in place of dGTP. PCRs were performed using 50 ng of genomic DNA in a 25  $\mu$ L reaction mix including 10X Expand Long Template Buffer 1, 2.5 mM MgCl<sub>2</sub> (Thermo Scientific, Cat#F-510Mg), 2% 2,4-dimethylsulfolane (Sigma, Cat#1003-78-7), 0.2 mM each of deaza-dGTP, dATP, dCTP, and dTTP, 0.2  $\mu$ M primers (BioSune, Shanghai, China) and 1 U of DNA polymerase from Expand Long Template PCR System (Roche, Cat#11681842001), using the following

potential disease variants were examined in Integrative Genomics Viewer.

### Long-Read Genome Sequencing

Long-read genome sequencing (LRS) on seven affected individuals (F1-IV:7, F1-IV:15, F2-II:3, F4-II:2, F5-II:1, F5-II:4, F9-II:6) and three healthy control subjects was performed on the Oxford Nanopore platform as describe previously.<sup>28</sup> Combined analysis strategy of RepeatHMM and inScan were used for detection in the target region. Minimap2 and nanopolish calls were used for analysis of DNA methylation.

### PCR Assays and GGC Repeat Size Determination

For the repeat-primed PCR (RP-PCR) assay, a fluorescein (FAM)-labeled gene-specific primer (5'-CCTCAGCCCGATACTACCCAT-3') and repeat-containing primers (5'-TACCAATACGCATCCCGC GATTTGCTTAA(CGG)<sub>n</sub>-3') were utilized for identifying the CGG repeat expansion. For the GC-rich PCR (GC-PCR) assay, the fluorescein (FAM)-labeled forward primer (5'-AGCGCCAGGGC CTGAGCCCTTTGAAGCAG-3') and reverse primer (5'-TCGCCCC AGGTGGCAGCCCCGGCGCCGCGGAC-3') were utilized for repeat size determination. Seven-deaza-2-deoxy guanosine triphos-

phate (deaza-dGTP) was used in place of dGTP. PCRs were performed using 50 ng of genomic DNA in a 25  $\mu$ L reaction mix including 10X Expand Long Template Buffer 1, 2.5 mM MgCl<sub>2</sub> (Thermo Scientific, Cat#F-510Mg), 2% 2,4-dimethylsulfolane (Sigma, Cat#1003-78-7), 0.2 mM each of deaza-dGTP, dATP, dCTP, and dTTP, 0.2  $\mu$ M primers (BioSune, Shanghai, China) and 1 U of DNA polymerase from Expand Long Template PCR System (Roche, Cat#11681842001), using the following thermal conditions: 98°C for 4 min, followed by 30 cycles of 98°C for 45 s, 60°C for 45 s, 72°C for 4 min, and a final extension at 72°C for 7 min. The PCR products were subjected to capillary electrophoresis using the 3500xL Genetic Analyzer for Human Identification (Applied Biosystems). Allele sizes were determined using GeneScan 1000 ROX Size Standard (Applied Biosystems). GGC repeats less than 200 were determined directly by the size of PCR product as determined by ABI 3500xL and compared with the PCR products of known *FMR1* (MIM: 309550) premutation CGG repeat alleles of various sizes. For GGC repeats over 200, the size was determined using an Agilent 2100.

### RNA Extraction and Quantitative RT-PCR

Human postmortem dorsolateral prefrontal cortex (DLPFC) tissue from the subjects of different ages (4, 15, 36, and 60 years old) were obtained from the NIH NeuroBioBank. Total RNA was isolated using Trizol (ThermoFisher). Before reverse transcription, total RNA was treated with ezDNase (Millipore) for 5 min at 37°C to remove contaminated genomic DNA, and then incubated at 55°C for 5 min to inactivate the ezDNase. After ezDNase treatment, total RNA was extracted with phenol: chloroform = 25:24 (pH 5.2) and precipitated with glycogen and ethanol. The reverse

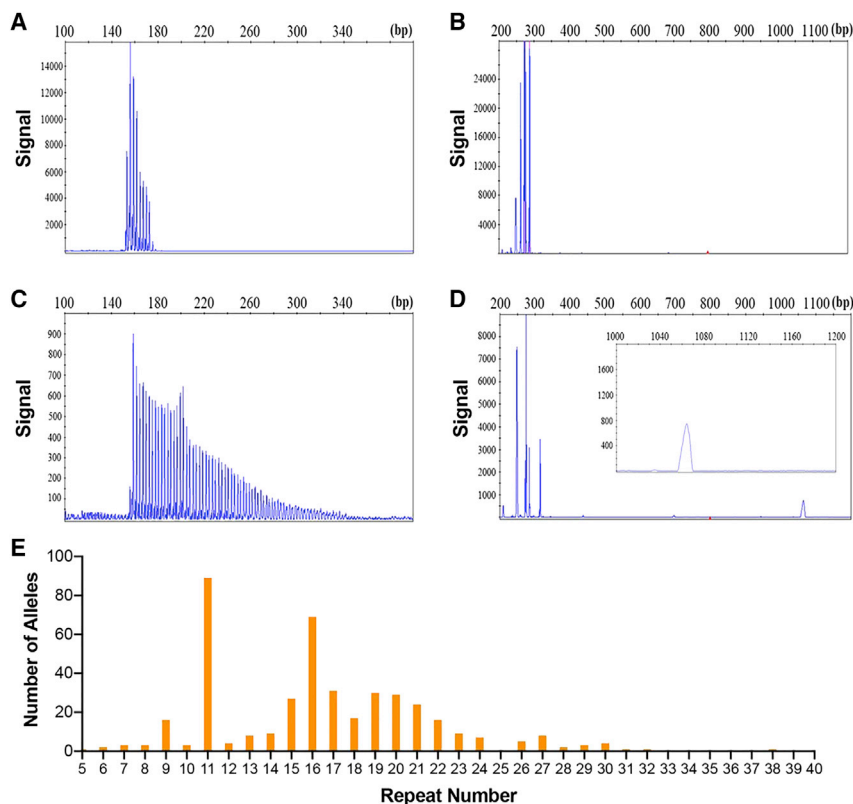

**Figure 2. Validation of Expanded GGC Repeats and Variations of GGC Repeat Size among Normal Individuals**

(A–D) Representative electropherogram of the RP-PCR assay and the GC-PCR assay showed abnormal repeat expansion in affected individuals (C and D) and negative result in control subjects (A and B). (E) Size distribution of GGC repeat among healthy control subjects, which are usually less than 40 repeats.

(chr1:109260034–159016186) (Figure 1B). To determine the genetic etiology of NIID in this family, we performed whole-exome sequencing (WES) in three affected individuals (F1-IV:1, F1-IV:6, and F1-IV:10) and one unaffected individual (F1-IV:3) (Figure 1A), and we were unable to identify any nonsynonymous or potentially causal variants. We went on to perform low-coverage long-read genome sequencing (LRS) on two other affected individuals (F1-IV:7, F1-IV:15) using the Oxford Nanopore platform. Intriguingly, we observed

that one allele of *NOTCH2NLC* had an expanded GGC repeat in both affected individuals (Figures 1C and S1), which WES failed to detect.

The expanded GGC repeat is located at the 5' end of *NOTCH2NLC*. *NOTCH2NLC* is one of the four *NOTCH2* paralogs that are present only in the human genome; the other paralogs are *NOTCH2NLA* (MIM: 618023), *NOTCH2NLB* (MIM: 618024), and *NOTCH2NLR* (MIM: 618026). Previous studies have shown that all four *NOTCH2NL* paralogs contain the first four exons and introns of *NOTCH2* as the result of a partial segmental duplication of the *NOTCH2* ancestral gene.<sup>30</sup> *NOTCH2NLA*, *B*, and *C* are highly similar to each other, with more than 98% sequence identity over *NOTCH2NL* exons 1–5.<sup>30</sup> However, only *NOTCH2NLC* contains the GGC repeat in the reference human genome (hg38), (GGC)<sub>9</sub>(GGA)<sub>2</sub>(GGC)<sub>2</sub>, which is expanded in the NIID-affected family that we have examined here (Figures 1D and 1E).

### Expanded GGC Repeat Is Associated with NIID

To confirm our Nanopore sequencing results, we designed primer sets for both repeat-primed PCR (RP-PCR) and GC-rich PCR (GC-PCR) assays to detect both normal and expanded GGC repeats. Among the 211 healthy control subjects that we examined, the GGC repeat sizes range from 5 to 38, with modes at 11 and 16 repeats (Figure 2E). Our RP-PCR analysis confirmed the expanded GGC repeat among the affected family members in family 1 (Figure 1A). All affected individuals in this family showed similar peak patterns using RP-PCR, indicating the

transcription was conducted using SuperScript (II) (ThermoFisher, Cat# Cat. No. 18064-022) to generate first strand cDNA. The first strand cDNA served as the template for real-time PCR using FAST-7500 real time PCR equipment (Thermo Fisher). GAPDH TaqMan Gene Expression Assay (Hs02786624\_g1) was used as an internal control. *NOTCH2NLB* primers: Forward (5'-GGGAGA TATGAAGGGACGCA-3'); Reverse (5'-GGCACACACCTTCCATT CTC-3'). *NOTCH2NLC* primers: Forward (5'-CTGACCTTCAA GATCCTGCTTTCATCCCAGCT-3'); Reverse (5'-AAGTGCCTACT TTGCGTAGCTGTGTGCTTGGCAGT-3').

### Statistical Analyses

For methylation analysis, the dispersion parameters were estimated through a shrinkage estimator based on a Bayesian hierarchical model, then a Wald test was performed as describe previously<sup>29</sup> to identify differentially methylated loci (DML). For the expression data of *NOTCH2NLC* in the blood of both NIID-affected individuals and control subjects, statistical analysis was performed using Student's t test. Differences with  $p < 0.05$  were considered as being statistically significant.

## Results

### Identification of an Expanded GGC Repeat within Human-Specific *NOTCH2NLC* in a NIID-Affected Family

We recruited a five-generation Chinese NIID-affected family (family 1) with muscle weakness-dominant type (Figure 1A) and performed genetic linkage analysis. Our analysis identified a single peak with a maximum logarithm of odds (LOD) score of 3.184 at 1p13.3-q23.1

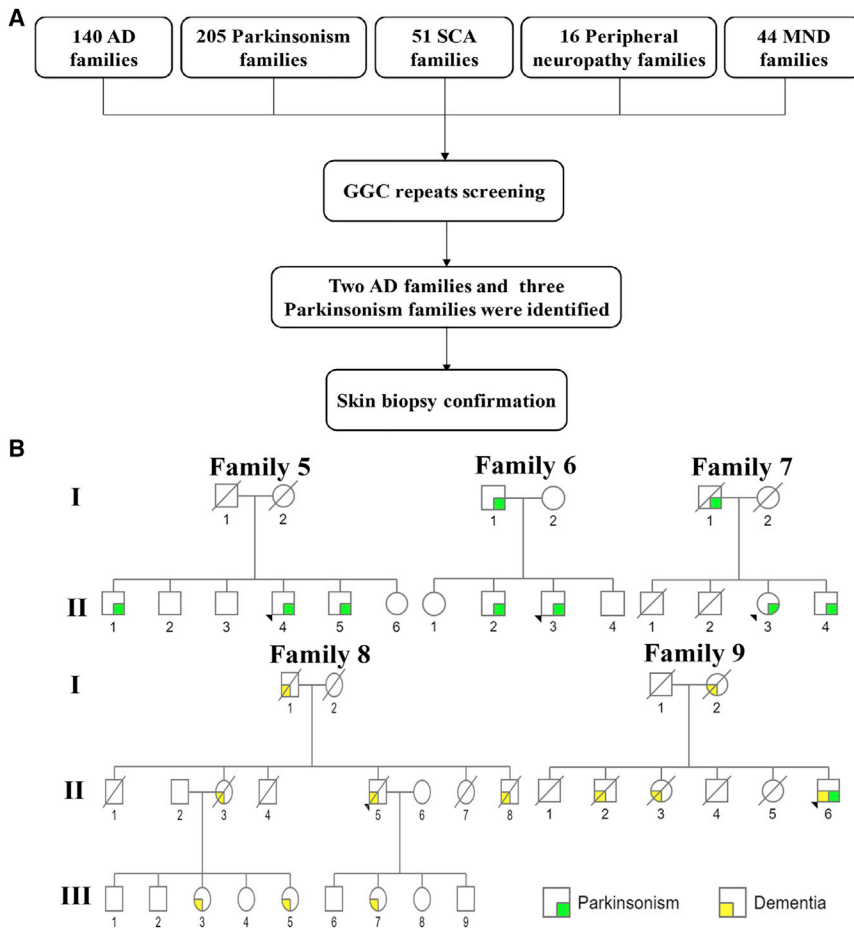

**Figure 3. Expanded GGC Repeats Are Associated with Dementia and Parkinsonism**  
 (A) Flow chart of GGC repeat expansion screening in a cohort of families with neurodegenerative disorders.  
 (B) Pedigrees of AD-affected and parkinsonism-affected families that carry expanded GGC repeats in *NOTCH2NLC*.

### Expanded GGC Repeat Is Associated with Dementia and Parkinsonism

Because of the wide range of clinical manifestations associated with NIID, we further determined the size of the GGC repeat in a cohort of 140 families with AD, 205 families with parkinsonism, 51 families with SCA, 16 families with peripheral neuropathy, and 44 families with MND (Figure 3A). Surprisingly, we found affected individuals from three parkinsonism-affected families (families 5–7) and two AD-affected families (families 8 and 9) that carry the expanded GGC repeat in *NOTCH2NLC* (Figure 3B, Tables 1, S2, and S3). LRS was also performed on three affected individuals (F5-II:1, F5-II:4, F9-II:6), confirming the presence of expanded GGC repeat (Figure S1). Upon reexamination, we confirmed that these individuals

presence of expanded GGC repeats (Figure 2C), while unaffected members of the pedigree carried only normal repeats (Figure 2A). We then determined the repeat size using GC-PCR and found that all the affected individuals carry alleles with greater than 100 repeats (Figure 2D). To further confirm the role of GGC repeat expansion in NIID, we examined three additional NIID-affected families (families 2–4) (Figure 1A) and five sporadic NIID-affected case subjects by RP-PCR and GC-PCR assays, some of which were further confirmed by LRS (Figure S1). All affected individuals from both familial and sporadic case subjects carried an expanded GGC repeat larger than 66. Together, these results suggest that GGC repeat expansion is indeed associated with NIID.

However, we did note that the expanded GGC repeat was also observed in a few individuals that were initially thought to be phenotypically normal, such as F1-III:5 and F1-III:8 (Figures S2A and S2B). Upon re-examination of subject F1-III:8, we found that this individual has subclinical peripheral neuropathy and typical eosinophilic intranuclear inclusions (Figures S2C and S2D). Subject F1-III:5 did not complain of limb weakness and refused to receive further examination but presented with tremor and disturbance of consciousness, which are the classic symptoms of NIID. Nevertheless, this indicates the possibility of varying severity for expanded GGC repeat-caused NIID.

display classic PD and AD symptoms, respectively. Intriguingly, their skin biopsies revealed typical eosinophilic, p62-positive, and ubiquitin-positive intranuclear inclusions, the pathological feature associated with classic NIID-affected individuals (Figures S3A–S3H and S3M–S3T). These findings suggest that the expanded GGC repeat could also be associated with dementia and parkinsonism.

### Expanded GGC Repeat and Phenotypic Variability

A total of 40 affected familial individuals with expanded GGC repeats, ranging from 66 to 517 repeats, were analyzed in this study. Only about 37.5% of affected familial individuals presented with the classical NIID radiological findings of symmetrical hyperintense linear lesions in the corticomedullary junction in DWI (Figure S4A) and severe white matter hyperintensity in FLAIR images/T2 weighted image (Figure S4B). However, all skin biopsies revealed eosinophilic, p62-positive, and ubiquitin-positive intranuclear inclusions in dermal cells (Figure S3). Electron microscopy imaging also revealed intranuclear inclusions lacking membranes (Figure S3H). The main clinical manifestations in these affected familial individuals included bladder dysfunction (56.4%), tremor (47.5%), muscle weakness (46.2%), abnormal behavior (37.5%), sensory disturbance (35.1%), dementia (35.0%), rigidity (30.0%), bradykinesia (30.0%), ataxia (17.5%), disturbance

**Table 1. Summary of Clinical Features of NIID**

|                                    | Sporadic Case Subjects (n = 5) | Familial Case Subjects |                          |                      |                   |
|------------------------------------|--------------------------------|------------------------|--------------------------|----------------------|-------------------|
|                                    |                                | Total (n = 40)         | Muscle Weakness (n = 15) | Parkinsonism (n = 9) | Dementia (n = 16) |
| Sex ratio (male/female)            | 2/3                            | 26/14                  | 12/3                     | 8/1                  | 6/10              |
| Average onset age (range)          | 62.0 (51–69)                   | 50.6 (30–78)           | 35.6 (30–54)             | 60.6 (37–78)         | 58.1 (31–71)      |
| Average disease duration (range)   | 5.6 (1–14)                     | 12.5 (1–49)            | 16.6 (3–49)              | 6.0 (1–15)           | 12.4 (2–30)       |
| <b>Clinical Manifestations</b>     |                                |                        |                          |                      |                   |
| Dementia                           | 2/5 (40.0%)                    | 14/40 (35.0%)          | 0/15 (0%)                | 0/9 (0%)             | 14/16 (87.5%)     |
| Abnormal behavior                  | 2/5 (40.0%)                    | 15/40 (37.5%)          | 2/15 (13.3%)             | 0/9 (0%)             | 13/16 (81.3%)     |
| Peripheral neuropathy              |                                |                        |                          |                      |                   |
| Muscle weakness                    | 0/5 (0%)                       | 18/39 (46.2%)          | 13/15 (86.7%)            | 1/9 (11.1%)          | 4/15 (26.7%)      |
| Sensory disturbance                | 0/5 (0%)                       | 13/37 (35.1%)          | 4/13 (30.8%)             | 4/9 (44.4%)          | 5/15 (33.3%)      |
| Autonomic dysfunction              |                                |                        |                          |                      |                   |
| Bladder dysfunction                | 3/5 (60.0%)                    | 22/39 (56.4%)          | 5/15 (33.3%)             | 5/9 (55.6%)          | 12/15 (80.0%)     |
| Miosis                             | 2/5 (40.0%)                    | 5/29 (17.2%)           | 1/11 (9.1%)              | 0/8 (0%)             | 4/10 (40.0%)      |
| Parkinsonism                       |                                |                        |                          |                      |                   |
| Tremor                             | 1/5 (20.0%)                    | 19/40 (47.5%)          | 11/15 (73.3%)            | 5/9 (55.6%)          | 3/16 (18.8%)      |
| Rigidity                           | 1/5 (20.0%)                    | 12/40 (30.0%)          | 1/15 (6.7%)              | 9/9 (100.0%)         | 2/16 (12.5%)      |
| Bradykinesia                       | 1/5 (20.0%)                    | 12/40 (30.0%)          | 1/15 (6.7%)              | 9/9 (100.0%)         | 2/16 (12.5%)      |
| Ataxia                             | 0/5 (0%)                       | 7/40 (17.5%)           | 2/15 (13.3%)             | 4/9 (44.4%)          | 1/16 (6.3%)       |
| Neurological attack                |                                |                        |                          |                      |                   |
| Disturbance of consciousness       | 4/5 (80.0%)                    | 7/40 (17.5%)           | 3/15 (20.0%)             | 1/9 (11.1%)          | 3/16 (18.8%)      |
| Stroke-like episode                | 4/5 (80.0%)                    | 4/40 (10.0%)           | 1/15 (6.7%)              | 2/9 (22.2%)          | 1/16 (6.3%)       |
| Encephalitic episode               | 3/5 (60.0%)                    | 2/40 (5.0%)            | 1/15 (6.7%)              | 0/9 (0%)             | 1/16 (6.3%)       |
| Brain MRI                          |                                |                        |                          |                      |                   |
| Severe leukoencephalopathy         | 5/5 (100.0%)                   | 7/20 (35.0%)           | 1/7 (14.3%)              | 2/6 (33.3%)          | 4/7 (57.1%)       |
| DWI U-fiber high signal            | 5/5 (100.0%)                   | 6/16 (37.5%)           | 1/3 (33.3%)              | 1/6 (16.7%)          | 4/7 (57.1%)       |
| Cognitive function test            |                                |                        |                          |                      |                   |
| MMSE (<education matched average)  | 0/2 (0%)                       | 4/21 (19.0%)           | 0/7 (0%)                 | 0/7 (0%)             | 4/7 (57.1%)       |
| MoCA (<education matched average)  | 1/2 (50.0%)                    | 9/16 (56.3%)           | 3/7 (42.9%)              | 4/5 (80.0%)          | 2/4 (50.0%)       |
| Nerve conduction                   |                                |                        |                          |                      |                   |
| MCV slowing                        | 3/3 (100.0%)                   | 19/22 (86.4%)          | 8/9 (88.9%)              | 6/6 (100%)           | 5/7 (71.4%)       |
| CMAP reduction                     | 1/3 (33.3%)                    | 14/22 (63.6%)          | 7/9 (77.8%)              | 2/6 (33.3%)          | 5/7 (71.4%)       |
| SCV slowing                        | 3/3 (100.0%)                   | 15/22 (68.2%)          | 7/9 (77.8%)              | 3/6 (50.0%)          | 5/7 (71.4%)       |
| SNAP reduction                     | 1/3 (33.3%)                    | 13/22 (59.1%)          | 6/9 (66.7%)              | 2/6 (33.3%)          | 5/7 (71.4%)       |
| Skin biopsy                        | 5                              | 14                     | 3                        | 5                    | 6                 |
| Average no. of GGC repeats (range) | 105 (86–133)                   | 188 (66–517)           | 272 (118–517)            | 83 (66–102)          | 129 (91–268)      |

of consciousness (17.5%), miosis (17.2%), stroke-like episodes (10.0%), and encephalitic episodes (5.0%) (Table 1). Based on the initial and main clinical manifestations among these affected individuals with expanded repeats, we were able to divide the familial case subjects into three subgroups: muscle weakness-dominant type, parkin-

sonism-dominant type, and dementia-dominant type (Table 1 and Supplemental Note).

The muscle weakness-dominant type (families 1 and 2) was similar to what has been reported for classic NIID where the main and initial clinical manifestation is muscle weakness. The average onset age was around 36 (Figure 1A,

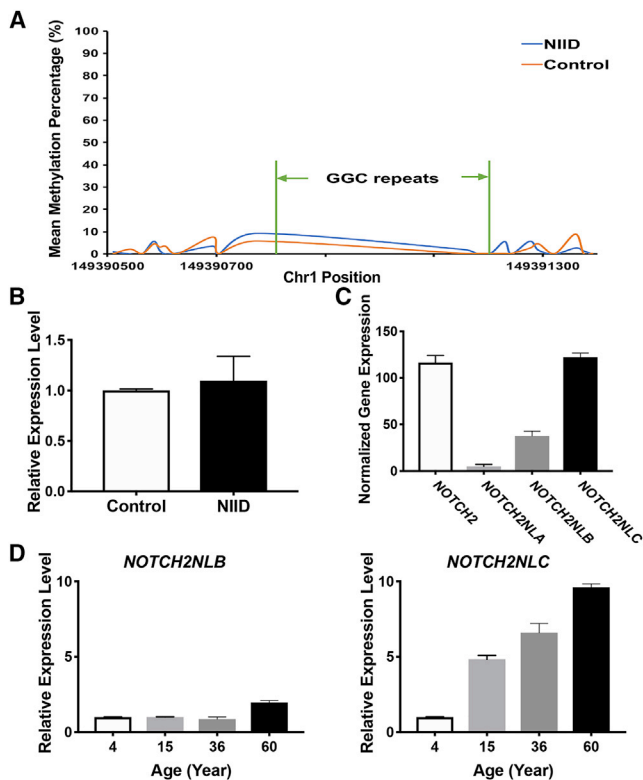

**Figure 4. Methylation and Expression at *NOTCH2NLC* Locus**  
 (A) Methylation status across expanded GGC repeats region was determined using LRS data from seven affected individuals (F1-IV:7, F1-IV:15, F2-II:3, F4-II:2, F5-II:1, F5-II:4, F9-II:6) and three healthy control subjects, and no significant methylation difference was detected between NIID-affected case subjects and control subjects. Wald test was performed for statistical analysis; \* $p < 0.05$ .  
 (B) *NOTCH2NLC* expression level in both NIID-affected case subjects (NIID) and normal control subjects (Control). The ezDNase-treated total RNA isolated from the blood of both NIID-affected case subjects and control subjects was reversely transcribed into cDNA followed by quantitative PCR. *GAPDH* was used as internal control. Error bars represent the SD; Student's *t* test was performed for statistical analysis; \* $p < 0.05$ .  $p = 0.776$  (ns).  
 (C) Expression levels of *NOTCH2* and three *NOTCH2NL* paralogs (*NOTCH2NLA*, *NOTCH2NLB*, and *NOTCH2NLC*) in human adult cortex detected by RNA-seq. Significant differences were observed in the expression levels of these four genes. Shown are the normalized gene expression levels. Error bars represent the SD.  
 (D) Dynamic change of *NOTCH2NLC* expression in human brain during aging. Relative expression levels of both *NOTCH2NLB* (left) and *NOTCH2NLC* (right) in DLPFC region of human brain during aging are shown. The total RNA isolated from the DLPFC of human postmortem brains from 4-, 15-, 36-, and 60-year-old subjects were used for quantitative RT-PCR with *GAPDH* as internal control. Error bars represent the SD.

Tables 1 and S1). Muscle weakness usually began in the distal part of lower limbs, then moved up to the throat muscles and face. However, the severity and position of muscle weakness could vary significantly between individuals. Tremor was frequently seen in the early stages of almost all of the affected members. The number of GGC repeats in this subgroup ranged from 118 to 517 repeats.

The parkinsonism-dominant type (families 5–7) presented with parkinsonism as the main clinical manifestation. The onset age was typically around 60 years old (Figure 3B, Tables 1 and S2). The severity of symptoms varied greatly, even between siblings with similar repeat sizes. No dementia was observed in either the muscle weakness or parkinsonism groups. A smaller repeat expansion, 66–102 repeats, was observed in this group.

In the dementia-dominant type (families 3, 4, 8, 9), individual characteristics were similar to the previously described dementia-dominant phenotype in NIID.<sup>2</sup> The average onset age was 58. Dementia was the most prominent symptom (Figures 1A and 3B, Tables 1 and S3). Abnormal behavior, autonomic dysfunction, disturbance of consciousness, tremor, rigidity, limb weakness, and sensory disturbance were also seen. This subgroup repeat size ranged from 91 to 268 GGC repeats.

#### Methylation and Expression at *NOTCH2NLC* Locus

Previous works have found that more than 200 CGG repeats at the *FMR1* locus can lead to hypermethylation of the CGG repeat and adjacent CpG islands, resulting in transcriptional silencing.<sup>31</sup> Because many of the expanded repeats that we discovered at the *NOTCH2NLC* locus in NIID-affected case subjects were greater than 200, we examined the methylation status of GGC repeat and adjacent regions by re-analyzing the signals from Nanopore sequencing. The methylation level around the GGC repeats was very low and no significant methylation difference between NIID and control was detected (Figure 4A), which suggests that the expanded GGC repeat at the *NOTCH2NLC* locus is likely unmethylated. Furthermore, we determined the expression of *NOTCH2NLC* in the blood of both NIID-affected case subjects and control subjects, and did not detect significant changes in expression for the NIID-affected case subjects with expanded GGC repeats (Figure 4B), indicating that the expanded GGC repeat does not alter the expression of *NOTCH2NLC* and that the GGC repeat RNA could potentially play a role in the molecular pathogenesis of NIID.

Previous studies have shown that *NOTCH2NLA*, *NOTCH2NLB*, and *NOTCH2NLC* can be transcribed in human ES cells.<sup>30,32</sup> We analyzed the expression of these three paralogs and *NOTCH2* using the published human brain RNA-seq datasets<sup>33</sup> and found that *NOTCH2NLC* displays the highest expression in the brain among these three *NOTCH2* paralogs (Figure 4C). Given that NIID is a neurodegenerative disorder, we designed specific primers that could distinguish the expression of *NOTCH2NLB* and *NOTCH2NLC* by RT-PCR (*NOTCH2NLA* has very low expression in brain; Figure 4C) and determined the expression dynamics of both genes during human brain aging. Interestingly, while the expression of *NOTCH2NLB* displays only modest changes in human prefrontal cortex during aging, the expression of *NOTCH2NLC* increased significantly with age (Figure 4D). Thus, the increased

expression of expanded GGC repeats during aging could contribute to the molecular pathogenesis of NIID.

## Discussion

Neuronal intranuclear inclusion disease (NIID) is a slowly progressing neurodegenerative disease characterized by eosinophilic intranuclear inclusions in the nervous system and multiple visceral organs. The clinical manifestation of NIID varies widely, and both familial and sporadic case subjects have been reported.<sup>2</sup> Here we report the identification of a GGC repeat expansion at the 5' end of *NOTCH2NLC* as the genetic cause of NIID. *NOTCH2NLC* is one of the three human-specific *NOTCH2*-related genes (*NOTCH2NLA*, *NOTCH2NLB*, and *NOTCH2NLC*) in 1q21.1, highly expressed in the brain and thought to be involved in the evolutionary expansion of the human brain.<sup>30,32</sup> Thus, NIID represents a genetic disorder caused by an expanded repeat in a human-specific gene.

Almost 30 years ago, expansion of unstable nucleotide (microsatellite) repeats, notably trinucleotide repeats, was identified as a previously unknown mutational mechanism underlying certain human diseases.<sup>34–37</sup> In recent years the development of next-generation sequencing along with the focus on exome capture provided a massive increase in the catalog of genes with mutations in Mendelian disorders;<sup>38–50</sup> however, in many instances the causal mutations could not be identified even when genome-wide association studies (GWASs) or genetic linkage analysis identified a specific genetic locus. Recent works, including identification of an unstable hexanucleotide repeat within *C9ORF72* (MIM: 614260) as a frequent cause of frontotemporal dementia (FTD)/amyotrophic lateral sclerosis (ALS)<sup>51,52</sup> and CTG repeat expansion as the cause of Fuch's endothelial corneal dystrophy (FECD),<sup>53</sup> suggest that repeat expansions could contribute to the genetic etiology of these disorders, which could be missed by short-read sequencing. In our initial analyses, we failed to detect any causal mutations using WES despite the fact that we mapped the NIID-causing gene to 1p13.3-q23.1. Our findings presented here further highlight the importance of considering the genetic contribution of unstable repeats in disorders where traditional single nucleotide variants (SNVs) or copy number variants (CNVs) cannot be identified.

In addition to GGC repeats, we did observe different repeat units, such as GGT, through our LRS analyses (Figure S1). This is likely due to the high error rate of LRS itself and interference of sequence from paralogs. With the high error rate of Nanopore sequencing, it was challenging to acquire accurate sequence data within the expanded GGC repeat region, which would require further analyses with more accurate methodology. Despite these technical issues, most reads that we obtained were expanded GGC repeats.

The key features associated with the disorders caused by unstable nucleotide (microsatellite) repeats are genetic

instability and anticipation.<sup>31</sup> In the NIID-affected families reported in our study, a wide range (66–517) of repeat numbers were observed in affected individuals, while control subjects have fewer than 40 repeats. Anticipation was seen in a few families, while unlike fragile X-related disorders, the pioneer locus with expanded CGG/GGC repeats, increased instability of the GGC repeat size over generations was not observed in all families. Therefore, anticipation was not clearly seen in NIID-affected families, and more NIID-affected families need to be studied to explore the genetic pattern over multiple generations. Nevertheless, the number of affected individuals does seem to increase over multiple generations, suggesting a potential genetic anticipation effect. We also observed variable severity in the clinical manifestation among our affected case subjects; however, there is no apparent association between GGC repeat size and the severity or the onset age in NIID. It is possible that additional genetic or environmental factors could contribute to the pathogenesis of NIID. In addition, extensive works on the *FMR1* locus have shown that there is a threshold for the methylation status of the CGG repeat.<sup>31</sup> Typically, if the CGG repeat is below 200, it is unmethylated, but the majority of expanded CGG repeats over 200 are hypermethylated, leading to transcriptional silencing of *FMR1* and fragile X syndrome.<sup>31</sup> Thus, it has been hypothesized that loci with more than 200 CGG repeats could be recognized by DNA methyltransferase(s) and induce hypermethylation.<sup>54</sup> Similar observations have recently been reported in Baratela-Scott syndrome (BSS), which was found due to an expanded GGC repeat in *XYLT1* (MIM: 608124).<sup>55</sup> However, as reported here, many expanded alleles associated with NIID-affected individuals exceeded 200 repeats but were not methylated. Our finding suggests that in addition to GGC/CGG repeat size, additional factor(s) or sequence(s) could also determine the methylation status of expanded GGC/CGG repeat *in vivo*.

Our analyses of both classic NIID and other individuals with neurological conditions revealed a broadened clinical spectrum of adult-onset NIID. Besides the suggested dementia-dominant type and muscle weakness-dominant type,<sup>2</sup> we have identified the parkinsonism-dominant type as a clinical presentation in NIID. Among sporadic case subjects, we also identified a paroxysmal disease-dominant type (Supplemental Note, Table S4). Furthermore, GGC repeat expansion was also observed in two AD-affected families (1.43%) and three parkinsonism-affected families (1.46%), implicating that GGC repeat expansions in *NOTCH2NLC* could also contribute to the pathogenesis of both AD and PD. Therefore, we suggest defining a term NIID-related disorders (NIIDRD), which include NIID and other related neurodegenerative diseases caused by the expanded GGC repeat. It is likely that the prevalence of NIIDRD could be higher than initially thought. Given that only about 37% of affected individuals showed typical MRI features of NIID, genetic testing



for the expanded GGC repeat could potentially be a more sensitive and accurate screening tool for NIIDRD.

Identification of the GGC repeat expansion as the genetic cause of NIID will help elucidate the molecular pathogenesis in NIID. Our results presented here suggest that the GGC repeat expansion-induced pathogenesis is likely dominant, which suggests that the expression of the expanded GGC repeat could cause the neuronal toxicity associated with NIID and its related disorders. Indeed, a dominant-negative gain-of-function model has been proposed for another neurodegenerative disorder, fragile X-associated tremor/ataxia syndrome (FXTAS [MIM: 300623]), which is also caused by the expanded GGC/CGG repeats.<sup>56</sup> Intriguingly, it was previously discussed that NIID and FXTAS share many clinical and neuropathological features,<sup>27,58</sup> which could be well explained by our genetic findings presented here. Two potential mechanisms have been proposed for FXTAS: RNA toxicity and repeat-associated non-AUG (RAN) translation.<sup>59</sup> The CGG repeat RNA could sequester key RNA binding proteins and prevent them from performing their normal physiological function.<sup>56</sup> Also, repeat-associated non-AUG (RAN) translation of the CGG repeat into polypeptides, the predominant species being poly-Glycine (FMRpolyG peptides), could contribute to FXTAS pathogenesis.<sup>60,61</sup> Both *FMR1* mRNA and FMRpolyG peptide have been found in the human postmortem brain inclusions that are characteristic of FXTAS pathology, suggesting that both mechanisms may contribute to the disease.<sup>60,62</sup> It will be important to explore both mechanisms in NIID pathogenesis in the future. In addition, it could be challenging to establish appropriate model(s) to study NIID since *NOTCH2NLC* is a human-specific gene.

In summary, we have identified an expanded GGC repeat within human-specific *NOTCH2NLC* as the genetic cause of NIIDRD, which could include dementia, parkinsonism, and peripheral neuropathy. Our finding will facilitate more accurate clinical diagnosis in the future and help us better understand the molecular pathogenesis of NIIDRD in general.

### Supplemental Data

Supplemental Data can be found online at <https://doi.org/10.1016/j.ajhg.2019.05.013>.

### Acknowledgments

We would like to thank the affected individuals for permitting us to publish this information and NIH NeuroBioBank for providing human brain tissues. This work was funded by National Key R&D Program of China (Grant2018YFC1312003) and National Natural Science Foundation of China (Grant81430023, Grant81701263, Grant81671075, Grant81771366, and Grant81671120).

### Declaration of Interests

The authors declare no competing interests.

Received: April 23, 2019

Accepted: May 17, 2019

Published: June 6, 2019

### Web Resources

GenBank, <https://www.ncbi.nlm.nih.gov/genbank/>  
Genomestudio (v.2011.1), [https://support.illumina.com/array/array\\_software/genomestudio/downloads.html](https://support.illumina.com/array/array_software/genomestudio/downloads.html)  
gnomAD Browser, <https://gnomad.broadinstitute.org/>  
IGV, <http://www.broadinstitute.org/igv/>  
inScan, <https://github.com/Nextomics/inScan>  
MERLIN (v.1.1.2), <http://csg.sph.umich.edu/abecasis/Merlin/download/>  
Minimap2, <https://github.com/lh3/minimap2>  
Nanopolish call, <https://github.com/jts/nanopolish>  
OMIM, <http://www.omim.org/>  
RepeatHMM, <https://github.com/WGLab/RepeatHMM>  
UCSC Genome Browser, <https://genome.ucsc.edu>

### References

1. Takahashi-Fujigasaki, J. (2003). Neuronal intranuclear hyaline inclusion disease. *Neuropathology* 23, 351–359.
2. Sone, J., Mori, K., Inagaki, T., Katsumata, R., Takagi, S., Yokoi, S., Araki, K., Kato, T., Nakamura, T., Koike, H., et al. (2016). Clinicopathological features of adult-onset neuronal intranuclear inclusion disease. *Brain* 139, 3170–3186.
3. Lindenberg, R., Rubinstein, L.J., Herman, M.M., and Haydon, G.B. (1968). A light and electron microscopy study of an unusual widespread nuclear inclusion body disease. A possible residuum of an old herpesvirus infection. *Acta Neuropathol.* 10, 54–73.
4. Liu, Y., Mimuro, M., Yoshida, M., Hashizume, Y., Niwa, H., Miyao, S., Ujihira, N., and Akatsu, H. (2008). Inclusion-positive cell types in adult-onset intranuclear inclusion body disease: implications for clinical diagnosis. *Acta Neuropathol.* 116, 615–623.
5. Kimber, T.E., Blumbergs, P.C., Rice, J.P., Hallpike, J.F., Edis, R., Thompson, P.D., and Suthers, G. (1998). Familial neuronal intranuclear inclusion disease with ubiquitin positive inclusions. *J. Neurol. Sci.* 160, 33–40.
6. Schuffler, M.D., Bird, T.D., Sumi, S.M., and Cook, A. (1978). A familial neuronal disease presenting as intestinal pseudoobstruction. *Gastroenterology* 75, 889–898.
7. Michaud, J., and Gilbert, J.J. (1981). Multiple system atrophy with neuronal intranuclear hyaline inclusions. Report of a new case with light and electron microscopic studies. *Acta Neuropathol.* 54, 113–119.
8. Patel, H., Norman, M.G., Perry, T.L., and Berry, K.E. (1985). Multiple system atrophy with neuronal intranuclear hyaline inclusions. Report of a case and review of the literature. *J. Neurol. Sci.* 67, 57–65.
9. Munoz-Garcia, D., and Ludwin, S.K. (1986). Adult-onset neuronal intranuclear hyaline inclusion disease. *Neurology* 36, 785–790.
10. Weidenheim, K.M., and Dickson, D.W. (1995). Intranuclear inclusion bodies in an elderly demented woman: a form of intranuclear inclusion body disease. *Clin. Neuropathol.* 14, 93–99.
11. Takahashi, J., Tanaka, J., Arai, K., Funata, N., Hattori, T., Fukuda, T., Fujigasaki, H., and Uchihara, T. (2001).

- Recruitment of nonexpanded polyglutamine proteins to intranuclear aggregates in neuronal intranuclear hyaline inclusion disease. *J. Neuropathol. Exp. Neurol.* 60, 369–376.
12. Pountney, D.L., Huang, Y., Burns, R.J., Haan, E., Thompson, P.D., Blumbergs, P.C., and Gai, W.P. (2003). SUMO-1 marks the nuclear inclusions in familial neuronal intranuclear inclusion disease. *Exp. Neurol.* 184, 436–446.
  13. Mori, F., Miki, Y., Tanji, K., Ogura, E., Yagihashi, N., Jensen, P.H., and Wakabayashi, K. (2011). Incipient intranuclear inclusion body disease in a 78-year-old woman. *Neuropathology* 31, 188–193.
  14. Sone, J., Tanaka, F., Koike, H., Inukai, A., Katsuno, M., Yoshida, M., Watanabe, H., and Sobue, G. (2011). Skin biopsy is useful for the antemortem diagnosis of neuronal intranuclear inclusion disease. *Neurology* 76, 1372–1376.
  15. Sone, J., Kitagawa, N., Sugawara, E., Iguchi, M., Nakamura, R., Koike, H., Iwasaki, Y., Yoshida, M., Takahashi, T., Chiba, S., et al. (2014). Neuronal intranuclear inclusion disease cases with leukoencephalopathy diagnosed via skin biopsy. *J. Neurol. Neurosurg. Psychiatry* 85, 354–356.
  16. Araki, K., Sone, J., Fujioka, Y., Masuda, M., Ohdake, R., Tanaka, Y., Nakamura, T., Watanabe, H., and Sobue, G. (2016). Memory Loss and Frontal Cognitive Dysfunction in a Patient with Adult-onset Neuronal Intranuclear Inclusion Disease. *Intern. Med.* 55, 2281–2284.
  17. Sone, J., Hishikawa, N., Koike, H., Hattori, N., Hirayama, M., Nagamatsu, M., Yamamoto, M., Tanaka, F., Yoshida, M., Hashizume, Y., et al. (2005). Neuronal intranuclear hyaline inclusion disease showing motor-sensory and autonomic neuropathy. *Neurology* 65, 1538–1543.
  18. Nakamura, M., Ueki, S., Kubo, M., Yagi, H., Sasaki, R., Okada, Y., Akiyuchi, I., Kusaka, H., and Kondo, T. (2018). Two cases of sporadic adult-onset neuronal intranuclear inclusion disease preceded by urinary disturbance for many years. *J. Neurol. Sci.* 392, 89–93.
  19. O'Sullivan, J.D., Hanagasi, H.A., Daniel, S.E., Tidswell, P., Davies, S.W., and Lees, A.J. (2000). Neuronal intranuclear inclusion disease and juvenile parkinsonism. *Mov. Disord.* 15, 990–995.
  20. Motoki, M., Nakajima, H., Sato, T., Tada, M., Kakita, A., and Arawaka, S. (2018). Neuronal intranuclear inclusion disease showing intranuclear inclusions in renal biopsy 12 years earlier. *Neurology* 91, 884–886.
  21. Toyota, T., Huang, Z., Nohara, S., Okada, K., Kakeda, S., Korigi, Y., Nakayama, T., Sone, J., Sobue, G., and Adachi, H. (2015). Neuronal intranuclear inclusion disease manifesting with new-onset epilepsy in the elderly. *Neurol. Clin. Neurosci.* 3, 238–240.
  22. Fujita, K., Osaki, Y., Miyamoto, R., Shimatani, Y., Abe, T., Sumikura, H., Murayama, S., Izumi, Y., and Kaji, R. (2017). Neurologic attack and dynamic perfusion abnormality in neuronal intranuclear inclusion disease. *Neurol. Clin. Pract.* 7, e39–e42.
  23. Abe, K., and Fujita, M. (2017). Over 10 years MRI observation of a patient with neuronal intranuclear inclusion disease. *BMJ Case Rep.* 2017, bcr2016218790.
  24. Sugiyama, A., Sato, N., Kimura, Y., Maekawa, T., Enokizono, M., Saito, Y., Takahashi, Y., Matsuda, H., and Kuwabara, S. (2017). MR Imaging Features of the Cerebellum in Adult-Onset Neuronal Intranuclear Inclusion Disease: 8 Cases. *AJNR Am. J. Neuroradiol.* 38, 2100–2104.
  25. Nakamura, M., Murray, M.E., Lin, W.-L., Kusaka, H., and Dickson, D.W. (2014). Optineurin immunoreactivity in neuronal and glial intranuclear inclusions in adult-onset neuronal intranuclear inclusion disease. *Am. J. Neurodegener. Dis.* 3, 93–102.
  26. Mori, F., Tanji, K., Kon, T., Odagiri, S., Hattori, M., Hoshikawa, Y., Kono, C., Yasui, K., Yokoi, S., Hasegawa, Y., et al. (2012). FUS immunoreactivity of neuronal and glial intranuclear inclusions in intranuclear inclusion body disease. *Neuropathol. Appl. Neurobiol.* 38, 322–328.
  27. Gelpi, E., Botta-Orfila, T., Bodi, L., Marti, S., Kovacs, G., Grau-Rivera, O., Lozano, M., Sánchez-Valle, R., Muñoz, E., Valldor-iola, F., et al. (2017). Neuronal intranuclear (hyaline) inclusion disease and fragile X-associated tremor/ataxia syndrome: a morphological and molecular dilemma. *Brain* 140, e51.
  28. Zeng, S., Zhang, M.-y., Wang, X., Hu, Z., Li, J., Li, N., Wang, J., Liang, F., Yang, Q., Liu, Q., et al. (2019). Long-read sequencing identified intronic repeat expansions in *SAMD12* from Chinese pedigrees affected with familial cortical myoclonic tremor with epilepsy. *J. Med. Genet.* 56, 265–270.
  29. Feng, H., Conneely, K.N., and Wu, H. (2014). A Bayesian hierarchical model to detect differentially methylated loci from single nucleotide resolution sequencing data. *Nucleic Acids Res.* 42, e69.
  30. Fiddes, I.T., Lodewijk, G.A., Mooring, M., Bosworth, C.M., Ewing, A.D., Mantalas, G.L., Novak, A.M., van den Bout, A., Bishara, A., Rosenkrantz, J.L., et al. (2018). Human-Specific NOTCH2NL Genes Affect Notch Signaling and Cortical Neurogenesis. *Cell* 173, 1356–1369.e22.
  31. Nelson, D.L., Orr, H.T., and Warren, S.T. (2013). The unstable repeats—three evolving faces of neurological disease. *Neuron* 77, 825–843.
  32. Suzuki, I.K., Gacquer, D., Van Heurck, R., Kumar, D., Wojno, M., Bilheu, A., Herpoel, A., Lambert, N., Cheron, J., Polleux, F., et al. (2018). Human-Specific NOTCH2NL Genes Expand Cortical Neurogenesis through Delta/Notch Regulation. *Cell* 173, 1370–1384.e16.
  33. Wang, T., Pan, Q., Lin, L., Szulwach, K.E., Song, C.X., He, C., Wu, H., Warren, S.T., Jin, P., Duan, R., and Li, X. (2012). Genome-wide DNA hydroxymethylation changes are associated with neurodevelopmental genes in the developing human cerebellum. *Hum. Mol. Genet.* 21, 5500–5510.
  34. Verkerk, A.J.M.H., Pieretti, M., Sutcliffe, J.S., Fu, Y.-H., Kuhl, D.P.A., Pizzuti, A., Reiner, O., Richards, S., Victoria, M.F., Zhang, F.P., et al. (1991). Identification of a gene (FMR-1) containing a CGG repeat coincident with a breakpoint cluster region exhibiting length variation in fragile X syndrome. *Cell* 65, 905–914.
  35. Vincent, A., Heitz, D., Petit, C., Kretz, C., Oberlé, I., and Mandel, J.-L. (1991). Abnormal pattern detected in fragile-X patients by pulsed-field gel electrophoresis. *Nature* 349, 624–626.
  36. La Spada, A.R., Wilson, E.M., Lubahn, D.B., Harding, A.E., and Fischbeck, K.H. (1991). Androgen receptor gene mutations in X-linked spinal and bulbar muscular atrophy. *Nature* 352, 77–79.
  37. Orr, H.T., Chung, M.Y., Banfi, S., Kwiatkowski, T.J., Jr., Servadio, A., Beaudet, A.L., McCall, A.E., Duvick, L.A., Ranum, L.P.W., and Zoghbi, H.Y. (1993). Expansion of an unstable trinucleotide CAG repeat in spinocerebellar ataxia type 1. *Nat. Genet.* 4, 221–226.
  38. Brook, J.D., McCurrach, M.E., Harley, H.G., Buckler, A.J., Church, D., Aburatani, H., Hunter, K., Stanton, V.P., Thirion, J.-P., Hudson, T., et al. (1992). Molecular basis of myotonic

- dystrophy: expansion of a trinucleotide (CTG) repeat at the 3' end of a transcript encoding a protein kinase family member. *Cell* 68, 799–808.
39. MacDonald, M.E., Ambrose, C.M., Duyao, M.P., Myers, R.H., Lin, C., Srinidhi, L., Barnes, G., Taylor, S.A., James, M., Groot, N., et al.; The Huntington's Disease Collaborative Research Group (1993). A novel gene containing a trinucleotide repeat that is expanded and unstable on Huntington's disease chromosomes. *Cell* 72, 971–983.
  40. Knight, S.J.L., Flannery, A.V., Hirst, M.C., Campbell, L., Christodoulou, Z., Phelps, S.R., Pointon, J., Middleton-Price, H.R., Barnicoat, A., Pembrey, M.E., et al. (1993). Trinucleotide repeat amplification and hypermethylation of a CpG island in FRAXE mental retardation. *Cell* 74, 127–134.
  41. Nagafuchi, S., Yanagisawa, H., Sato, K., Shirayama, T., Ohsaki, E., Bundo, M., Takeda, T., Tadokoro, K., Kondo, I., Murayama, N., et al. (1994). Dentatorubral and pallidolusian atrophy expansion of an unstable CAG trinucleotide on chromosome 12p. *Nat. Genet.* 6, 14–18.
  42. Kawaguchi, Y., Okamoto, T., Taniwaki, M., Aizawa, M., Inoue, M., Katayama, S., Kawakami, H., Nakamura, S., Nishimura, M., Akiguchi, I., et al. (1994). CAG expansions in a novel gene for Machado-Joseph disease at chromosome 14q32.1. *Nat. Genet.* 8, 221–228.
  43. Lindblad, K., Savontaus, M.L., Stevanin, G., Holmberg, M., Digre, K., Zander, C., Ehrsson, H., David, G., Benomar, A., Nikoskelainen, E., et al. (1996). An expanded CAG repeat sequence in spinocerebellar ataxia type 7. *Genome Res.* 6, 965–971.
  44. Pulst, S.-M., Nechiporuk, A., Nechiporuk, T., Gispert, S., Chen, X.-N., Lopes-Cendes, I., Pearlman, S., Starkman, S., Orozco-Diaz, G., Lunke, A., et al. (1996). Moderate expansion of a normally biallelic trinucleotide repeat in spinocerebellar ataxia type 2. *Nat. Genet.* 14, 269–276.
  45. Ishikawa, K., Tanaka, H., Saito, M., Ohkoshi, N., Fujita, T., Yoshizawa, K., Ikeuchi, T., Watanabe, M., Hayashi, A., Takiyama, Y., et al. (1997). Japanese families with autosomal dominant pure cerebellar ataxia map to chromosome 19p13.1-p13.2 and are strongly associated with mild CAG expansions in the spinocerebellar ataxia type 6 gene in chromosome 19p13.1. *Am. J. Hum. Genet.* 61, 336–346.
  46. Campuzano, V., Montermini, L., Moltò, M.D., Pianese, L., Cossée, M., Cavalcanti, F., Monros, E., Rodius, F., Ducloux, E., Monticelli, A., et al. (1996). Friedreich's ataxia: autosomal recessive disease caused by an intronic GAA triplet repeat expansion. *Science* 271, 1423–1427.
  47. Holmes, S.E., O'Hearn, E.E., McInnis, M.G., Gorelick-Feldman, D.A., Kleiderlein, J.J., Callahan, C., Kwak, N.G., Ingersoll-Ashworth, R.G., Sherr, M., Sumner, A.J., et al. (1999). Expansion of a novel CAG trinucleotide repeat in the 5' region of PPP2R2B is associated with SCA12. *Nat. Genet.* 23, 391–392.
  48. Koob, M.D., Moseley, M.L., Schut, L.J., Benzow, K.A., Bird, T.D., Day, J.W., and Ranum, L.P.W. (1999). An untranslated CTG expansion causes a novel form of spinocerebellar ataxia (SCA8). *Nat. Genet.* 21, 379–384.
  49. Nakamura, K., Jeong, S.Y., Uchihara, T., Anno, M., Nagashima, K., Nagashima, T., Ikeda, S., Tsuji, S., and Kanazawa, I. (2001). SCA17, a novel autosomal dominant cerebellar ataxia caused by an expanded polyglutamine in TATA-binding protein. *Hum. Mol. Genet.* 10, 1441–1448.
  50. Jacquemont, S., Hagerman, R.J., Leehey, M.A., Hall, D.A., Levine, R.A., Brunberg, J.A., Zhang, L., Jardini, T., Gane, L.W., Harris, S.W., et al. (2004). Penetrance of the fragile X-associated tremor/ataxia syndrome in a premutation carrier population. *JAMA* 291, 460–469.
  51. DeJesus-Hernandez, M., Mackenzie, I.R., Boeve, B.F., Boxer, A.L., Baker, M., Rutherford, N.J., Nicholson, A.M., Finch, N.A., Flynn, H., Adamson, J., et al. (2011). Expanded GGGGCC hexanucleotide repeat in noncoding region of C9ORF72 causes chromosome 9p-linked FTD and ALS. *Neuron* 72, 245–256.
  52. Renton, A.E., Majounie, E., Waite, A., Simón-Sánchez, J., Rollinson, S., Gibbs, J.R., Schymick, J.C., Laaksovirta, H., van Swieten, J.C., Myllykangas, L., et al.; ITALSGEN Consortium (2011). A hexanucleotide repeat expansion in C9ORF72 is the cause of chromosome 9p21-linked ALS-FTD. *Neuron* 72, 257–268.
  53. Mootha, V.V., Gong, X., Ku, H.-C., and Xing, C. (2014). Association and familial segregation of CTG18.1 trinucleotide repeat expansion of TCF4 gene in Fuchs' endothelial corneal dystrophy. *Invest. Ophthalmol. Vis. Sci.* 55, 33–42.
  54. Jin, P., Alisch, R.S., and Warren, S.T. (2004). RNA and microRNAs in fragile X mental retardation. *Nat. Cell Biol.* 6, 1048–1053.
  55. LaCroix, A.J., Stabley, D., Sahraoui, R., Adam, M.P., Mehaffey, M., Kernan, K., Myers, C.T., Fagerstrom, C., Anadiotis, G., Akkari, Y.M., et al.; University of Washington Center for Mendelian Genomics (2019). GGC Repeat Expansion and Exon 1 Methylation of XYLT1 Is a Common Pathogenic Variant in Baratela-Scott Syndrome. *Am. J. Hum. Genet.* 104, 35–44.
  56. Kong, H.E., Zhao, J., Xu, S., Jin, P., and Jin, Y. (2017). Fragile X-Associated Tremor/Ataxia Syndrome: From Molecular Pathogenesis to Development of Therapeutics. *Front. Cell. Neurosci.* 11, 128.
  58. Sone, J., Nakamura, T., Koike, H., Katsuno, M., Tanaka, F., Iwasaki, Y., Yoshida, M., and Sobue, G. (2017). Reply: Neuronal intranuclear (hyaline) inclusion disease and fragile X-associated tremor/ataxia syndrome: a morphological and molecular dilemma. *Brain* 140, e52.
  59. Glineburg, M.R., Todd, P.K., Charlet-Berguerand, N., and Sellier, C. (2018). Repeat-associated non-AUG (RAN) translation and other molecular mechanisms in Fragile X Tremor Ataxia Syndrome. *Brain Res.* 1693 (Pt A), 43–54.
  60. Todd, P.K., Oh, S.Y., Krans, A., He, F., Sellier, C., Frazer, M., Renoux, A.J., Chen, K.C., Scaglione, K.M., Basur, V., et al. (2013). CGG repeat-associated translation mediates neurodegeneration in fragile X tremor ataxia syndrome. *Neuron* 78, 440–455.
  61. Sellier, C., Buijsen, R.A.M., He, F., Natla, S., Jung, L., Tropel, P., Gaucherot, A., Jacobs, H., Meziante, H., Vincent, A., et al. (2017). Translation of Expanded CGG Repeats into FMRpolyG Is Pathogenic and May Contribute to Fragile X Tremor Ataxia Syndrome. *Neuron* 93, 331–347.
  62. Tassone, F., Iwahashi, C., and Hagerman, P.J. (2004). FMR1 RNA within the intranuclear inclusions of fragile X-associated tremor/ataxia syndrome (FXTAS). *RNA Biol.* 1, 103–105.

## Supplemental Data

### Expansion of Human-Specific GGC Repeat

### in Neuronal Intranuclear Inclusion

### Disease-Related Disorders

Yun Tian, Jun-Ling Wang, Wen Huang, Sheng Zeng, Bin Jiao, Zhen Liu, Zhao Chen, Yujing Li, Ying Wang, Hao-Xuan Min, Xue-Jing Wang, Yong You, Ru-Xu Zhang, Xiao-Yu Chen, Fang Yi, Ya-Fang Zhou, Hong-Yu Long, Chao-Jun Zhou, Xuan Hou, Jun-Pu Wang, Bin Xie, Fan Liang, Zhuan-Yi Yang, Qi-Ying Sun, Emily G. Allen, Andrew Mark Shafik, Ha Eun Kong, Ji-Feng Guo, Xin-Xiang Yan, Zheng-Mao Hu, Kun Xia, Hong Jiang, Hong-Wei Xu, Ran-Hui Duan, Peng Jin, Bei-Sha Tang, and Lu Shen

## **Supplemental Note**

### **Case Report**

#### **Case F1-IV: 6**

A 47-year-old male presented with limb weakness for 14 years. His four brothers also presented with muscle weakness in their early 30s. Muscle weakness began in the distal portion of the lower limbs, then moved up to the throat muscles and face. He routinely felt numbness in his limbs. The neurological examination revealed miosis, muscle atrophy, bilateral hand resting tremor, postural tremor, intention tremor, ataxia and weakness of the four limbs. Mini-Mental State Examination (MMSE) score was 29. Nerve conduction studies showed slowed motor and sensory nerve conduction velocity. Eosinophilic intranuclear inclusions were found in his skin samples, and the diagnosis of NIID was made.

#### **Case F6-II: 3**

A 49-year-old male was admitted to the hospital because of progressive slow walking over the last 3 years. The man was diagnosed with Parkinson's disease in 2017, and showed good response with dopaminergic therapy. He also complained about sleep disorders, constipation, and urgency of urination. The neurological examination revealed muscle rigidity and bradykinesia of right upper and lower limb. Unified Parkinson's disease rating scale (UPDRS) motor score was 5. Memory, orientation, and calculation were normal. The Mini-Mental State Examination (MMSE) score was 30, and the Montreal cognitive assessment scale (MoCA) score was 25. Blood chemistry was normal. Further skin biopsy confirmed the diagnosis of NIID.

#### **Case F9-II: 6**

An 81-year-old male presented with progressive cognitive decline for 10 years, and was diagnosed with Alzheimer's disease in 2015. His medical history included hypertension, diabetes, and he had to wear a catheter at all times due to urine retention over the past 10 years. His siblings had also been diagnosed with Alzheimer's disease. He had experienced several loss of consciousness episodes that lasted a few minutes each. The neurological examination revealed cognitive impairment, miosis, bilateral hand resting tremor, muscle rigidity, and bradykinesia. His brain DWI images showed typical high signal in the corticomedullary junction, Fluid-attenuated inversion

recovery (FLAIR) images showed severe white matter hyperintensity. CSF examination was normal, including the protein level and cytology. Electroencephalogram showed an increase in slow waves and no epileptiform discharges. He further received a skin biopsy which confirmed the diagnosis of NIID.

### **Case SP1**

A 69-year-old male with left hemiplegia was admitted to the hospital. There was no medical history or family history for him. The neurological examination revealed complete recovery from the left hemiplegia. MMSE score was 27. No typical high signal in acute cerebral infarction was observed in DWI, while symmetrical hyperintense linear lesions was presented in the corticomedullary junction. Nerve conduction studies showed slowed motor and sensory nerve conduction velocity. His skin samples indicated typical NIID pathology.

**Figure S1. Summary of Reads Covering Expanded Repeat Region from Oxford Nanopore Platform.**

| ID       | Reads  | Insertion Size | Repeat Number | Repeat Pattern | Match Ratio (observed read/pure repeat) |
|----------|--------|----------------|---------------|----------------|-----------------------------------------|
| F1-IV:7  | read 1 | 666            | 222           | GGT            | 77%                                     |
|          | read 2 | 645            | 215           | GGT            | 74%                                     |
| F1-IV:15 | read 1 | 344            | 114           | GGT            | 88%                                     |
|          | read 2 | 340            | 113           | GGC            | 78%                                     |
|          | read 3 | 295            | 98            | GGC            | 86%                                     |
|          | read 4 | 370            | 123           | GGT/GGC        | 81%/78%                                 |
| F2-II:3  | read 1 | 561            | 187           | GGC            | 74%                                     |
|          | read 2 | 568            | 189           | GGC            | 71%                                     |
|          | read 3 | 625            | 208           | GGC            | 73%                                     |
|          | read 4 | 628            | 209           | GGC            | 83%                                     |
|          | read 5 | 635            | 211           | GGC            | 76%                                     |
| F4-II:2  | read 1 | 322            | 107           | GGT/GGC        | 80%                                     |
|          | read 2 | 327            | 109           | GGT/GGC        | 79%/77%                                 |
|          | read 3 | 384            | 128           | GGC/AGC        | 87%/83%                                 |
|          | read 4 | 410            | 136           | GGC            | 76%                                     |
|          | read 5 | 357            | 119           | GGC            | 83%                                     |
|          | read 6 | 342            | 114           | GGC            | 84%                                     |
| F5-II:1  | read 1 | 342            | 114           | GGC            | 84%                                     |
|          | read 2 | 263            | 87            | GGC            | 84%                                     |
|          | read 3 | 248            | 82            | GGC            | 87%                                     |
| F5-II:4  | read 1 | 311            | 103           | GGT/GGC        | 86%/84%                                 |
|          | read 2 | 348            | 116           | GGT            | 88%                                     |
| F9-II:6  | read 1 | 345            | 115           | GGC            | 78%                                     |
|          | read 2 | 396            | 132           | GGC            | 85%                                     |
|          | read 3 | 403            | 134           | GGC            | 78%                                     |
|          | read 4 | 449            | 149           | AGC            | 81%                                     |
|          | read 5 | 356            | 118           | GGC            | 82%                                     |
|          | read 6 | 385            | 128           | GGC            | 77%                                     |
|          | read 7 | 343            | 114           | GGT/GGC        | 77%/84%                                 |

**Raw sequence data of expanded repeat region from Oxford Nanopore platform.**

**F1-IV:7-read 1**

ACCATAAGTGTTTAGAAGTTTGAATTTTATCCTAGGGAGCTAGGGAGAGGTTCT  
ATGGGTAGATTTCCCTCATCCCAACAGATTGTAAACTCCCACATCCAATTAGTC  
ACACCTCCATTTTTTTCTGTTTCTTTAACATTGTCTCAGATTCATTCCTTCTGA  
AATCTACCTTATTAGTTCAGGTCTTCTTAAATTTGTGCTCTGGACTGTTCACTCA  
ACTCTTTGACTGGTCCTGGGCTCCAGTTCACCTCTTGCTCTAAATAATCAATTT  
TCTACAGAACTACTGAGCAATCTCCTTCCATCAATCTCAACTCTGTTCAAAAAA  
CTTGTTGTGTTTTATAGACCCAAGAGGTAGCTGCTCCCACCCTTTCAGCTTGCT  
AGTCTGGCTGTACACTGTCCCAACCCCTTTTCCTATTCTTGACTCCTCCTCTCA  
CTGCTAACAGAGACAGAACTCATTTACTTACTCTTTGACTGTAATTTTCGAGCC  
ACGAGGGCTCTTCCGAATGATATGTCCATACTACTATTGTTGTTGTTCTTACTT  
TTAGCCTCTTTTTCTTAGCCCACTTGTACCCAGGTTTGACTACACCCTACTCTC  
CTGCCCTGAAGTAACTAATATTCTGGTTATAGTTCTTAATATCTATATCTATACAT  
TCTATATATATGCATCCACAGATAATGTAGTATTGTCTTTAAAAAATATACATGT  
ACCGTATACTTTTGTCTCCTCTCTGCATTAGCTTTTTTTCATCATTTATTTTT  
AAGATTTATCCCTATTGGACATAAATAGCTATAGTCTTTTCAATTACTGTGTTGC  
ATTTTACCTTATAAATATGCTCATACTATTGTCTATCCATTCCTCTAAGGTGTGGCA  
TTTATGTTGTTTTCAAGGTTTTGCTATTACAGTGTTAGATAAATATCCTTAGCTTA  
GCTGGTCTCCTTGTCTTATACAAATTTTACGACCTTCAAGATCCTGCTTTCATC  
CCAGCCTCTGGGAAAGCTCTTCCCTGAACTTTCAGCCTTGGCTGTGCCAGCAAA  
GTCTGGCATCAAAGTTGCTTGCATCTTTGGTATCATCCCACTGCTAAAGCACAA  
CAGCTACTAAAGTAAGGCACTTTAAGAAATATCTGCCACACGGATGAATGTGA  
ATGAATGAATGGGGCAGTACCACTCGTGATGGCTCTATTCCTTTTAATGGACTA  
TGCTGGGCCTACTTCCTTCTTTGGATGTTAATCATCCACTCCAGAGCATTCTCT  
AGCTAGCAAAGCAGTGTGGATGTGGGTGTAGGTGGCGATGCCAGACTCACTG  
GATGAGGACCGCCTCCCTGCAAGTCACGATCCCGGCAACTCCAGTGCTTGAA  
GTTTCAAGAGTCCACCCACCCCTCACCTCCACGCCCTTCTGCACTGGTCGT  
TTTTGAAGGAGCCGCTTGGCCCTGATCGAGTTAAGGCTGCTGGAGAAGGATGC  
GGACGGGCCAGTGACTCGTAGTAGATCCTCCGCGCGAGCTCGGGTCCGGCGCT



TCTTCCTGCGGGAAACCCTGGTGCCCAAGGTGGCGGGGGCTGAGGCTGCGGC  
GACAGTGGGTAACAGGTGGGAGGAGTGGCTGAGGGAAGGATTGGTCGAGGA  
TGCTTCTGCTGCACACCTGAGAAAGTTTCACAAAACCTTCGGGCGGCGGCTGG  
AGGCGGCGGCCGAGGAGCGCGGACCTGGGGCGCGGGGAGTCGAGGCATTTG  
CGCTTCTGTAAGCTGACTGTGTTAGGGCTTGAGTTTTTTGAAGCAGGAGGAGGG  
GAGGAGAGAGGGGTTTCACGGGGACCTTCCCATGTGGATTCAAGCCCA**GGTG**  
**GCGGTGGCGGGGCAGTGGCGGTGGTGGCGGTGGTGGTGGCGGTGGCGGTGG**  
**CGGTGGTGGTGGTGGTGGTGGTGGTGGTGGTGGTGGTGGTGGTGGTGGTGG**  
**TGTGGGTGGTGGCGGGTGGTGGTGGCGGTGGTGGTGGCGGTGGTGGTGGCGG**  
**TGGCGGTGGCGGCGGCAGGTGGTGGTGGCGGGTGGGTGGTGGTGGTGGTGG**  
**GTGGTGGTGGTGGTGGTGGTGGTGGTGGTGGTGGTGGTGGTGGTGGTGGTGG**  
**GAGAGGTGGTGGTGGAGGGAGGTGGGTGGTGGAGGGAGGTGGTGGTGGAGG**  
**AGTGTGGTGGTGGAGGAGGTGGGTGGTGGAGGGAGGTGGTGGTGGAGGGAG**  
**GTGGTGGTGGAGGGAGGTGGTGGTGGAGGAGGTGGTGGGTGAGGAGGTGGG**  
**TGGTGGGAGGGAGGTGGTGGTGGAGGAGGTGGTGGTGGTGGTGGTGGTGGT**  
**AGAGGGAGGTGGTGGTGGAGGGAGGTGGTGGTGGAGGAGGTGGTGGTGGAG**  
**GAGGTGGCGGTGGAGGAGGTGGTGGTGGAGGGAGGTGGTGGTGGAGGAGGTG**  
**GTGGTGGAGGAGGTGGTGGTGGAGAGGTGGGTGGTGGAGGAGGGTGGTGGC**  
**GGGAGGAGGTGGCGGCGGAGGAGGCGGCGGCGGGAGGAGGCGGCGGC**

**FI-IV:7-read 2**

ATTTTGACTACGTTTATTTTTGAAAAGGGTTTCCAGCATTTC AATGTGACTATCA  
CTAATGATACTTGCTTTTGCCTAAAGTGCTTGTTAATATGCAGTTTTGGAATTCT  
GGCAGGTCTATGCCCATACTGACTCTTCAATTTCTGCTTAGTGTGTTTACATCT  
CTAGTTCAACACCTATTATGTGATAGACACTGGGATTAATAGGCTGTGGTCTTT  
GCCCATGAGGACCCTCAAACCTTAGTTGAGAACACAGGAAATACAAAGAGTC  
CTGTGTGAAAAATAAGCATTGGTGTTAAGATAAAGAAGCGGGGCAGTGGAAG  
ACAGTGGAGGGATCTCTGTCTGTTAGAGGGAGGAATTTATTGCAGTGTTCGGCA  
AAGCCTTCTTTGGACTGAAGGATGAATTATGATTTAAAGTTCATTAAGAGGGA  
GGAGGGAAGGGACTACAGGAGTCATTCCAAGCCAAAGGAACAAAAGATACA  
GGGACAGAAACAGCAAGATATGTTTGGGGAATCTCTGGGTAGCTAATACTGT

TATTGTGTAAGTTCACAACAGGGGCAGGGAGGACAGGAGATGGGGCCCAATG  
ACTAGCCTTTGTATGTGCCCATGTTTAGGTTTGAATTTATCCTATAGGAGTCAGG  
AGAGGTTCTATGGGTAGGATTCCCATCCCAACAGGATTGTAAACTCCTGGCAC  
ATCCAATTAGTTTACACCTCCATTTTTTTTTTCTCATTTCCTTAAACATTGTCTCAGA  
TTCATCTTCTGAAATTCACCTTATTAGTTCAGGTCTTAAATTTGTGCCTGGACT  
GTTACCAACTCGATCGGTCCTGGGGCTCCAGTTCACCTTGCCCCAACAAATCA  
ATTTTTCTACAGAACTATCAGGGACAATCTTCCTTTCCATCAATCTCAACTCTGT  
TCAAAAACCTTCAATAGTTCCTATGTGACCTAAGAGGTAGGCTGCCTCCCACCC  
TTTCAGCTTGGGCTATCTGTTGCCGTATAATTTGTCCCAAATTTCTTTCCGGTTC  
TTGACTCCTCTTCTCACTGCTAACAGAGACAGAACTATTTACTTACTCTTTGAC  
TGACCTGCTTTCACCTAGGCTCTTCCTGAATGATATGTCCATACAACTATTGTT  
GTTGTTCCATTTTTAGCTCTTTTCTTAGCCCACTGTACCCAGGTTTGATCACACC  
CCCTACTCTGCCCTGAAGTAACCACATTCTGGTTATAGTCTTTAATATCTATATTT  
ATCTATATATGCATCCACATGGCTAATGTGTAGTATTGTCTTGAAAAATATACAT  
AAATGGTATAATTTTTGTCTCCCTTACATTAGTTTTCACTATCATTTAGTTTTAAG  
ATTTATCCTATTGACATAAATAGCTATAGTCTTTTCAATTACTGTGTTGCATTTCA  
TTTTATAAATATAACCACATTGTCTATCCATTCTCTAAGGGTGGGTATTTATGTTG  
TTTTTCAAGGTTTTACATGGTGTTACAATCTAATATCCTTAGCTTAGCTGGTCTC  
CTTGTCTTATGCTACAAATTTTACTGACCTTTCAAGATCCTGCTTTTCATCCCAG  
CTCCTTCGGGGAAAGCCTTCCTGAATCCCAGCCCACAGCGCAAAGTCTTGGT  
ACTAAAGCTGCTTGTGCATCTTGGTATCATCCTACTGCTACAATAACAGCTACT  
TAGCAAGGCACTTAAGAAATATTCGCCACACGGATGAACAAATGAATGAATGA  
ATGGGGCAGCACCACCCGTGATGGCTCTCTATTCTTTAATGGACTTTATGCC  
TTGGCCCCTTCTTCTTCTTTGACAGCACTGGTCCTGTACTCCAGAGCATT  
CTCTAGCTAGCAAAGCAGTGTGTGGATGTGTGGGGTGTAGGTGGCGATACAGA  
CCTCACTGGATGAGGGACCGCCTCTCCTCTGCAAGTTCACGATCCCGGCAACC  
CCAGTGCTTCAGTTCAGAGTCCCACCTCACCCCTCACCTCCACGCCCTTTCT  
GCACTGGTCAAGCCAGAGCCGCTGCAGCCCCATCGAGTTAAGGCCATGGAGA  
AGGATGCGACGGGGCCAGTGACCTGTAGATCCCTCCGCGCGGAGCCTGGGCT  
GGCGCTTCTTCTGCGGGAAACCCTGGTGCCCAAGGCGGCGGGGCCGAGCCG



TTAAATTTGTGCCTGACTGTTACCAACTTGACTGGTCCTTAGCTCCAGTTCAC  
CTCTTGCTCCCCAACAATCAATTTTCACAGAACTATCAGAGCAATCTTCCCTTT  
CCATCAATCAACTCTGTTCAAAAACCTTCAATAGTTTTATGACCTAAGAGGCTT  
CCTCACCTTTCAGCTTCTGCCATTCAAGGCCGTGTACTIONTTGTCCCAACCCCTT  
CCGTCCTTGGACTCCTCTCACTGCTAATGAGATACAGAACTCATTACTTACTC  
TTGACTGTACCTTTGCTTTCACGAGGGCTCTTTCCTGGAATGATATGTCCATAC  
ACAACCTATTGTTGTTGTTCTTAGCTTTCAGTCTTTTCTTAGCCTCACTGTACCCA  
GGTTTGACCCACACCCCGCCTCCTGCCCTGAAGTAATTACTTATTCCAAGTTAT  
AGTCTCTAATATCTATATTCATATTCATATATATAACCAAATAGAGTACGTAGTATT  
GTCTTGAAAAATATACATAAATGGTATACTTTGTCTCCCTCAAGCATTAGTTTT  
TTCACTATCATTTAGTTTTTAAGATTTATCTTATTGAGGCTAAATAGCTATAGTCT  
TTCACTCATTGTGTGTTGTGTATTTCATTTTATAAATATACCATGTTAATATTCAT  
CCATTCCTCTAAGGGTGGGTAGTACTTGTTACTTTTCAAGGTTTTGCTATTACA  
GTAACCAAATATCCTTTAGCTTAGCTGGTCTCCTTGTCTTATACAAATTTTTTAC  
TGACCTTTC AAGATCCTGCTTATCCCAGCTCCTCTGGGAAAGCCTTCCCTGAAT  
CCCCAGCCACAGCGGCAAAGTCTGGTACTCAAAGTTGCTTGTGCACTTTGGT  
GTCATCCCCTGCTACACACAGCTACGCAAAGCAAGGCACTTACATGATGATA  
GCCCAAATGAATGAATGAATGGGGCAGCACTACTCCGTGATGGCTCTATTCCTT  
TTAATGGACTTGCGCCTTGGCCCACTTTCCTTCTTTGACAGCACTGGTCCTA  
CCAGAGCACATTCTCTAGCTAGCAAAGGTGGATGTGTGGTGTAGGTGGCGATA  
CAGACCTCACTGGATGAGAACGCCTCCCTGCAAGTTCACGATCCCGGCAACCT  
GTGCTTGAAGTTCAGGGAGTCCTACCCACCCCTCACCTCCACGCCCTTCTGC  
ACTGGTCATTAAAGGAGCCGCTGCAGCCCTGATCGAGTTAAGGCTGCTGGAG  
AAGGATGCGGACGGGCCAGTGACTGTAGTAGATCCCTCTGCGCGGAGCCTGG  
CCGCGCTTCTTCTGCGGGAAACCCAGGCTCAAGGCAGCTGAGGCTCGCG  
GCGCGACAGGGCGGGGGCTTATGGGAGGAGGCGGCTGAGGCGGAAAGACAC  
GAGGTTGCTTGCTGCACACTGAGAAAGTTTCAGCCAAATCTCATGGCGGGTTG  
AGGCGGCGGCCGAGGAGCGGCGGGACTCTGGGGCGCGGGGGGAGTTGAGGG  
CATTTGCGCTTGCCTTGGACCGTAGCGCCAGGGCTCTGAGCTTTGAAGCAGGG  
GAGGGAGGGGAGAGAGGCCTTCTTATCGGGACCCTTCCCATGTGGGATCTGC

CCAGGC **GGCGGGCGGTGGCAGTGGGTGGTGGCGGGTGGTGGTGGTGGT**  
**GGTGGTGGTGGTGGTGGTGGTGGTGGTGGTGGTGGTGGTGGTGGTGGT**  
**GGTGGTGGTGGTGGTGGTGGTGGTGGTGGTGGTGGTGGTGGTGGTGG**  
**TGGTGGTGGGTGGTGGTGGGTGGTGGTGGTGGTGGTGGTGGTGGTGGT**  
**GTGGTGGTGGTGGTGGTGGTGGTGGTGGTGGTGGTGGTGGTGGTGGG**  
**TGGTGAGGGAGGTGGTGGTGGAGAGGTGTGGTGGTGGTGGTGGTGGTGGT**  
**GAGGGAGGTGGTGGTGGAGGGAGGTGGTGTGGAGGAGGC**

**F1-IV:15-read 2**

TTAGTGAGTAAAGAGGAAGATCAGACTGGTAACACTGCTTGGTGAAACAAC  
GAAAATAATGTTATCTTTCTCTGAACATACTTACAAGACAAATTTAAAAATATT  
TTGACTACGTTATTTTTTGA AAAAGGGTTTCCAGTATTTCAATGTGACTACTTTC  
ACTAATGATGCCTTTTCAAAGTTAACATTAACATGCAGTTTTGGAATTTTCATAG  
ATCTACCTTTATATACTGACTTGTACTTGCTTAGTGTTGTTTTACATTCTAGTTCA  
ACATGTTATGTGATGAACACTGAGGTTAATGGCTGTGGTCTTTGCCCATGAGGG  
ACCTCAAAACTTAGTTGAGAACACAGAAATACAAAAGAGTCCTGTGTGAAAA  
TAAGTATTGGTGTTAAGATAAAGAAGCTGACAGTGGAAGACAGTGGAGGGAC  
TGTCTGTTAGAGGGAGAATTGTTGGGTGTCGGCAAAGCCCTTCTTTGGACAGA  
GATGGGAGTGTGATTAGAAGTTCATTAAGAGGAGGAGGAAGGGACTACAGTC  
ATTTCAAGCCAAAAGGAACAAAAGATACAGGGACAGAAACAGCAAAGATATG  
TTTGGGGAATCTCAAGTTAATACTGTTGTTGTGTGGGAAGTTCACAACAGGGG  
CAGGAGGAGGACAGGAGATGGGGCCAATGACGAAAAGGCCTTGTATGTACC  
ATGTTTGGGGGTTGAATTTTATCCTGGAGTCAGGGAGGTTCTGGGTGGGATTT  
CCATCCCAACAGGATTGTAAACTCCCACATCCAATTAGTCCCTCATTTTTTCTG  
TTCCTTTAACGTGTCTCAGATTCATCCCTTCTAAATCTACCTTATTGAGTTTCAA  
GGTCTTCTTAAATTTATTGCCTGGACTGTTACCGCCTCTTGACTGGTCCTGGG  
GCTCCAGTTCACCTCTTGCTCCCAACAATCAATTTTCTACAGAACTATCAGAGC  
AATCTTCCTTTCCATCAATCTCAACTCTGTTCAAACTTTCCAATAGTTTTTTAT  
GCTTGAGCTAAGAGGTAGCTTCTCCACCCTTTCAGCTTGCCATTCGAGGCTG  
CATAATTTAGTCCCAACCCCTTTCGTCAGCAGCTCCTCTCCTGCTAACAGAGAC  
CATTCACTTCTTTTACTGTACCTTTGCTTTCCACGAGGGCTCTTTCTGGA



AGGAGGCGGCAGCGGAGGCAGCGGAGGAGGCGGCAGCGGAGGAGGCGGCA  
GCGGAGGGCAGCAGCGGAGGGGAGGCAGCGGCGGAGGAGGCGGC

**F1-IV:15-read 3**

CTGGGATTATGACGCAAAGCGCCCGCCTGGCCTACATTTATTTAATAATGTATGC  
TTCTAGTCGCTTCTAGGTTGCTCTCTTTGGGGATAACTATCTTATATTCTTCTACA  
GATATGTTTTAATAGTGACAAAAGTCTTTACGGTGATTTTAAGAAAATTTGTAT  
GCAGCCAGTACTATATGAATTATCTCTGGTGAGTAAAGAGGAAGATCGAACTG  
GTAACACTGTGGGTAACAAGTGAATAATGTTATCTTTCTCAAGAACATACTTG  
CTGAACAAATTCAAAAAATATTTTGACTCGTTATTTTTGAAAAAGGGTTTCTGA  
CAATATATTTCAAATGCGACTACTTTCCTAATGATGCCCTTTTAAAGTGCTTG  
GTAACATGCGGTTTTGGAATTTCCCTTAGGTCTATGCCCTTGACTTGTGTACTTG  
CTTTTGATGTTGTTTACATTCTAGTTCAACATCTATTATGTGATAGACACTGGGA  
TTAATAGGCTGGCGATTCTTTTACCCATGAGGACCTCAAAGTATTGATTGAGAACA  
CAGAAATACAAAAGGAATCCTGGCCGAAAATAAGTATTATTGTTGGAATAAAG  
CGGCAATGGAAGACAGTGGAGGGACTGTCTGTTAGAGGAATTATTGTGGTGTGTC  
GGCAAGCCTTCTTTGATGAGGATAATTCGTTTAGAAGTTCTGTTAAGGGGAGG  
AGGGAAGGGGACAAGGTCATTGAAGCCAAAGGAATAAAAGATACAGGGACA  
GAAACAACAGCAAGATATGTTTAGGGGGAATCTCAGTGTAATACTGTTATTGTG  
TGAAGTTCACAACAGGGGCAGGGAGATGGGGCCTTAATGTGAAAAGGCCTTG  
TATGTACCATGTTTAAGTTTGAATTTATCTAGGGGAGTCAGGAGAGGAGTTCTA  
TGGTGGATTTCCCATCCAACAGGATTAGCAAAGTCCCCACATCCAATTAGTCCA  
CCTCCTTTTTTTCTGTTTCTTTAACATTGTCTCAGATTCATTCCTTCTGAAATCTA  
CCTTATTAGTTCAGGTCTTCTTAAATTTGTAAGTGGACTGTTCTGTACTCTTGGCT  
TTGGTCCCTGGGGCTCCAGTTCACCTCTTGCTCCCAACAATCAGTACAGAGACT  
ATCAGAGCATCTTCCTTTCCGTAATCTCAACTCTGTTTTCAAAGTCTTCCAATA  
GTTTATGTGACCTAAGAGGTAGCTGCCTCCCCACCCTTTCAACGCATTCAAGG  
CTGCATAATTTAGTCCCAACCCCTTTCAGGTCCTTGACTCACTGTAACAGAGAC  
AGAAGTCCCATTTGCCTCTTTTGACTGCTTTCTTTGCTTTTCGAGGGGCTCTTTC  
CTGGAATGATATGTCCATACAAGCTACTGCTGTTGTTCTTACTTTTAGCTCTTTC  
TTAGCCCACTGCCAGGTTTGATCGTCACTACTCACCTGGAAGTAGCCTATTAT

TCCTGGGTTATAGTCTCTTAGCCTTCTATATCTATATCTATATATATATGCATCCCC  
AGATAATGTATTGTCTTGAAAAATATACATAAATGGTATACTTTGTCTCCCTCTAT  
AAGTTAGTTTTTCCACTGTCATTTAGTTTTAAGATTTATCCTATTGACATAAATA  
GCTATAGTCTTTTCAATTACTGTGTTGCATTTTATTTATAAATATACATGCAGTA  
TTCATCCATTCCTCTAGGGTGCTGAGGCGTATGTATTTGTTTTCAAGGGTTTTGC  
TGTACAGTGTTAGCGAATATCCTTAACTAGCTAGTCCTCCTTGTCTTATACAAAT  
TTGCAACTTTCAAGATCTGCTTTCATCAACGCTCTATGGAAAGCCTTCCCTGAA  
TCCCCAGCCCGGCGGCAAGTCTTGGTACTCAAAGTTGCTTATGCATCTTTGGTA  
TCATCCACTACCAAGCACACAGCTGCGCGAAATGTAAAATATTCGCTACGGAT  
GAATTGAAATGAATGAATGAATGGGGCAGCACCCGCCGTGATGGCTCTATTATTC  
CTTTTTAATGGACTTGCGTACTGTCTTTGACAGCTTCTGGTCCTACTCAGAGCA  
TTCCTCTAGCTAACAAAGCAGTGTGTGTGGATGTGTGTGTGCGGTTAGCGGGT  
GGCGTCTGAACCTCACTGGACCGCCTCCTGCAGTTCGATCCCGGCAAACCTCCA  
GTGGCAGAGTTCGAGTCCTACCCCCCTCACCTCCACGCCCTTCTGCACTGGT  
CAGGCAGCGAGCCGCTGCAGCCCTGATCCAGTTAGGCTGCCTGCTGGAAGGA  
CGGACAGGCCAGTGACTCGTGATCCCTCGCGCGCGCGGAGCTCGGGCCCGGC  
ATATTTCTGCGGGAAACCCCTGGGTGCCTGCCCAAGGCGGCGGCGGGGCCG  
AGGCCGCAACATTGCCAGTAAGGCAGGGGCTTTGCGGTGGGAGGCGGCTGGC  
CTTGGGTTACGAGGGCTGCTAAGCTGCACACGCGAAAGTTTCAGCAGGCGGC  
GGCTGGAGGCGGCGACCGAGGGAGCGGCAGACTCAGGGGCGCAGGGGAGTC  
GAGGGCATTGCGCCTGTGCTGGACCATGGCGCGCAGGACTGGGCAACGCCA  
GGAGGAGGAGAGTGGGGCTCTATCAGGTTATGGATCTGCCA **GGCGGCGGCGC**  
**GGCGGCGCGCTGACGGCGGCGGCGGCGGCGGCGGCGGCGGCGGCGGCGGCGGCG**  
**GCGGCGGCGGCGGCGGCGGCGGCGGCGGCGGCGGCGGCGGCGGCGGCGGCGGCG**  
**GCGGCGGCGGCGGCGGCGGCGGCGGCGGCGGCGGCGGCGGCGGCGGCGGCGGCGG**  
**CGGCGGCGGCGGCGGCGGCGGCGGCGGCGGCGGCGGCGGCGGCGGCGGCGGCGGCGG**  
**GGCGGAGGAGGCGGCGGCGGAGGGCGGCGGCGGAGGCGGCGGCGGCGGAGG**  
**GCGGCGGCGGAGGCGGCGGCGGCGGCGGCGGCGGCGGCGGCGGCGGCGGCGGCGGCGG**

***F1-IV:15-read 4***

AGTTACGTATTGGTTATTTTATCCTATAGGAGTCAGAGAGGTTCTATGGGTAGG



ATTTCCCATCCCAACAGGATTGTAAACTCCACATCCAATTAGTCACACCTCCAT  
TTTTTTTTTTCTGTTTCTTTAACATTGTCTCAGATTCATTCCTTCTGAAATCTACC  
TTATTAGTTCAGGTCTTTCAATTTGTGCCTGGACTGTTACCAATTTGACTGGT  
CCTGGGGCTCCAGTTCACCTCTGCTCCAACAATCAATTTTCTACAGAACCATCA  
GAGCAATCTTCCTTTCCATCAATCTCAACTCTGTCTAAAACTTTCAATAGTTT  
TATGTGACCTAAGAGGTAGAAGCTGCCTCCCACCCTTTCAGCTTGCCATTCAA  
GGCTGCACACTCTGTCCCAACTCTTTCCATTCTTGACCTCTCACTGCCACCAG  
AGACAGAACTCCATTTACTTACTCTTTTGACTGTACCTTTTGCTTTCACGGTGG  
CTCTTCGAATGATATATTCATACTAATATGCTGTTGTTCTTACTTTTACTCTT  
TTCAGCCTCCTAATTTGTACCTATAGGTTTGATCACAATTTTACCTCCTGCCCTA  
GAAGTAACTAATGTTCTGCTATAGTCTCTTAACATTCTATATCTATATCTATATG  
CTAATTCACAGATAATGGTATTGTCTTGAAAAATATACATAAATTTGTATACT  
TTTTAGTTCCTCAAGGACATTAGTTTTTTTTTCATCATCATTTAGTTTTTAAGATT  
TATCCTTATTGACATAAATAGCTATAGTCTTTTTCAATTACGTTGCATTTCAATTC  
CGAGTAAATATACTCCACATTATTCATCCATTCTCTATGTGGCATTATGTTGTT  
TTCAAGTGTTTTTGCTATTACAGTGTTACAAACGAATATCCTTAGCTTAGCTGGT  
CTCTTGTTCTATACAAATTTTACTGACCTTTCAAGATCCTGCTTTCATCCCAGCT  
CCTCTGGGAAAGCTTTCCCTGAATCCCCAGCCCACAGCGCAAAGTTCACTCA  
AAGTTGCTTGTCATCTTTGCATCATCCCACTGCTAAGCACACAGCCACGCC  
AGCAAGGCACTTAAGAAATATCGCCAATGGATGAAATCAAAAATGAATGAATG  
AATGGGCAGCACCACCGTGATGGCTCTATTCCTTTTTAATGGACTTTCATGTT  
TTGGGCTCACTCTTCTCTTGTGACAGCACTGGTCCTACTCCAGCATTCTCTAG  
CTAGCAAAGCAGTGTGTGATGTGTGGGTGTAGGTGGCGACAAGAGACCACTG  
GATGAGAATCGCTCCTCCTGCAAGTTCACGATCCCGCAACTCCAGTGCTTAG  
TTCAGGAGTCCTACCCACCCCTCACCTCCACGCCCTTCTGCACTGGTCAGCT  
AGCGAGCCGCTGCAGCCCTGATCGAGTTAAGGCTGCTGGAGAAGGATGCGGA  
TTTGTGCCGCATTCCGTAGACCTCCGCGGAGCTCGGGCCGGCGCTTCTTCCTG  
CGGGAAACCCCTGCGCTCCAAGGCGGCGTGGGGGGCTGAGGCTGCGGGCGAC  
AGTGGGGCGGGGGCCGGTGGTGGGAGGAGGCGGCTGAGGCGGGAAGGGATA  
CACGAGGTTGAAAGCTTGCTGCACACCTGAGAAAGTTTAGCTAAATCTGGCG

GTGGCTGAGGTGGCGCGAGGAGCGGCGGACGGGGCGCGGGGAGTCGAGGTG  
ATGGTGCCAAAGCTGACTGGGGCGCTGTGCCTGGAGCTTGAAGGCAGAGGAG  
AGAGAGAAAGCGGGTTTATCGGGACTTTCTATGGGATTTGCCGCAGG**GGTGTG**  
**GTGGTGGTGGTGTGGTGGTGGTGGTGGTGGCGGTGGTGGTGGCGGTGGTGGT**  
**GGTGGCGGTGGTGGTGGTGGTGGTGGTGGCGGGTGGTGGTGGTGGTGGTGGT**  
**CGGTGGTGGTGGTGGCGGCGGTGGTGGTGGCGGTGGTGGCGGTGGCGTGGTG**  
**GCGGTGGTGGTGCGGTGGCGGTGGTGGTGGTGGTGGTGGTGGTGGTGGTGGT**  
**GGTGGTGGCGGTGGCGGGTGGCGGTGGCGGTGGCGGTGGCGGTGGCGGCGG**  
**CGGCGGTGGAGGAGGCGGCGGTGGAGGAGGTGGTGGCGGAGGAGGCGGTGG**  
**AGGAGGCGGCGGCGGAGGAGGCGGCGGCGGTGAGGCGGCGGCGGAGGAGG**  
**CGGC**

**F2-II:3-read 1**

CAGTGATTTTTAAAATTGTATGCAGCCAAGTCACCCTCGTTATCTTTAGTGAGT  
AAGGAAGATCGAACTGAAGTAGCTGCTGTGGGTAAGTGAAGAAGCAATGTTA  
TCTTTCTCTGGTATACTTGCACAGACAAATTCAAAAATATTTGACTACGTTATTT  
TGAAAAGGGTTTCCAGTATTTCAATGTGACTACTTTCACATAATGATACTTGCTT  
ACCTAAAGTGCTTGTTAACATGCAGTTTTGGAATTTTCATGATCTGGCTTACATA  
CAACATACTTGCTTAGTGTTGTTTTTACATTCTAGTTCAACATCTATTATGTGATA  
GACTACTGGGGATTAATAGGCTGTGGTCTTTGCCCATGAGGGACCTCAAACTT  
AGTTGAGAACACAGAAATACAAAGAGTCCTGTGTGAAAATAAGTAGTGGTGT  
TAAGATAAAGAAAGCGGCAGTGGAGACGGTGGAGGGACTGTCTGTTGGAGG  
AGGAATTTATTGTGGTGTGGCCAAGCCTTCTTTGGACTGAGGATGAATTATGAT  
TAGAAGTTCATTAAGAGGAGGAGGGAAGGGGACTACAGAGTCATTCCAAGCC  
AAGGAACAAAGATACAGGGACAGAAACAGCAGATATGTTTGGGAGATCTCAA  
GTTAGCCAATACTGTTATTGTGTGAGATTCACAACAGGGGCAGGGAGGACAGG  
AGATGGGGCCCAATGGCGAAAAGGCCTTGTATGTACCATGTTTAGGAACAGAT  
TACATCCTATGAGGTCAGGGAGAGGTTCTATGGGTAGGATTTCCCATCCCAACA  
GTTGTAAACTCCCATCCAATTAGTCACCTCCCATTTTTTCTGTTTCTTTTAAACA  
TCATAATTCATTCCTTCAAATCTACCTTGGCTGATTCAGGTCTTCCAAATTTGTT  
ACTGGACTGTTACCAACTCTTGACTGGTCCTGGGGCTCCAGTTCACCTCTTG





AAATTTATCCCTATTGACATAAATAGCTATAGTCTTTTCAATTGCTGTGTTGCATT  
TTATTTATAAATATAACCATACATTATTCATCCATTCTCTAAGGGTGAGCATTATAT  
TTTCAAAGGTTTTTTATATTACAGTGTTACAACGTTATCCTTAGCTTAGCTGGTCT  
CCTTGCTTACTGAATTTTACTGACCTTCAAGAGTCTGCTTTCATCCCAGCTC  
CTCTGGAAGCTTCCCTGAATCCCCACAGCCTGACGGCAAAAGTCTTGGTACT  
CAAAGTTGCTTGACCGTCTTTGTTGTCATCCACTGCCAAGCACACAGCTTTCAT  
AAAGTAAGGCACTTAAAATATTCGCTACACGGATGAACAAATGAATGAATAGT  
GAACTGCATTTTTCTCCGTGATGACTCCTATTATTCCTTTAATGGACTTTGGC  
ATGTGGCCCCACTTTCCTTCTTGAGCACTGGTCCCTACTCCAGAGCATTGTTC  
CTCCTAGCTAGCAAAGCAGTGTGTGGATGTGTGTGTGGGGTGTAGGTGGCAAT  
CCTGAACCTCACTGGATGAGGACCGCCTCTCCTGCAAGTTCACGATCTGGCAA  
ACTCCAGTGCTTGAGTTCAGGTCTACCCACCCCTCACCTCCACGCCCTTCT  
GCACAGGTCCAGCAGGCCGCTGCAGCCCCTGATCAGAGTTAAGGCTGCTGGA  
GAAGGATGCGGACAGGGGCCAGTGACTCGTAGTAGATCCCTCCGCGCGGAGC  
TCGGGCCGCGCTTCTTCTGCAGGAAGCCCCTGGGTGCCCAAGGCGGCGGG  
GCCGAGGGCCACTGCAACGACGAGTGGGGCAGGGCTTGCGGTGGGAGGAGG  
CGGCTGAGCGGAAGGACACACGAGGGCTGCTTCGCTGCACACCGAGAAAGT  
TCCGGCTGGAACTTGGGCGGCGGCTGGGCGGCGGCCAAGACGGCGGACTC  
AGGGGCGCAGGGAGTCGAGGCATTTGCGCCTGTGCTTTGGACCCGCCGCGCC  
AGGGCCTGAGCCTTTGAAGCAGGAGGAGAGAGAGTGGGGCTCCTCTTCGGG  
CCCCTCCCATGTGATCTGCCCAAGCGGCGGCGGCTGGCAGCGGCAACTGGC  
AGCGGCGGCGGCAGCGGCAGCAGCAACGGCAACGGCACGGCAGCAGCGGCG  
GCGGCGGCGGCGGCAGCAGCAGCAGCAGCAGCAGCAGCGGCAGCGGCACCGGCA  
ACGGCAGCAACAACGGCAACAACAGCAACGGCAACGGCAGCGGCGGCAGCA  
GCAACAGCAACGGCAGCAGCAGCAGCAGCGGCAGCAGCAGCAGCGGGAGAGGC  
AACGGCGGAGGAGCAACGTGGAGGAGGCGGCGGCGGGAGGAGGCAACAGC  
GGAGGAGGCGGCGGCGGAGGGCGGCGGCGGAGGAGGCGGCGGCGGAGGAG  
GCGGCGGCGGAGGTGGCAGGAGGAAAGCGGCGGCGGAGAGGCGGCGGCA  
GGGAGCCGGCGGCGGAGGAGGCGGCGGCGGAGGAACGGCAGCGGAGGAGG  
CGGCGGCGGAGGAGGGCTGACGGCGGAGGGCTGGCAGCGGAGGAGGCGGC

GGCGGAGGAGGCGGCAGCGGAGGAGGCGGCAGCGGAGGAGGCGGCAGCGG  
AGAGCAGCAGCGGAAGGAGGCGCGAGCGGAGGCGGC

**F2-II:3-read 3**

GTTATCTTTAGTAGTGAAGAGGAAGATCGAACTGTGGTAACTGTGCCCAGG  
TGAAACATGAAAAATAATATTATCTTTTCTCTAAGACATACTTTTGAGACAAAA  
TTCCAAAAAATATTTTGACTACGTTGTTTTGAAAGGGTTCCAAGTATTTTCAAG  
TGACTACTTTCCTATGATACTTGCCCCTAAAAAGTACTTAGCATTAAACATGCA  
GTTTTGGAATTTCCCTTAGATTCTACCCATGCAAGCTTGCCTTGAGTGTTTGTTTT  
CTGGTTCCTTTATCTATTATGTGAAGTGAACACTAAGTTATCGACTGCATGGTCT  
TCCTTGTAGGGACCTCAAAAAGTTAGTTGAACACAGAAATACAAAGAAGTCCT  
GTGAAAAATAAGTAGCCAATTTTAAGATAAAAAAGCGGCAGTAGAAGACAGT  
GGAAGGGACTATCTGTTAGAGGAGAATTTGTTGTGGTGTCATGCACTTCTTTG  
GACTGAGGATGAATTATGATTAGAAATTCATTAAGAGGAGGAGGAAGGGGACT  
ACAGGGGTCATTTCCAAGCCAAAGACAAAAGATGAGGGACAGAAGCAACAA  
GACAGATATGTTTTGGGGGAATCTCAAGTTAATAATACTGTTGTGTGAAGTTCA  
CAACAGAGCAGGAGGGACAGGAGATGGAGACTAATAAGCGAAAAAGGCCTT  
GTATGTTACCATGTTTAAGTTTAGATTTTATCTATAGGAGTCAGGGAGGGAGTTC  
TATGGGTGGGATTTCCATCCCAACAGGTTGTAAACTCCCACGTCAATTAGTCCA  
CCTCCATTTTTTTCTGTTTTACTTTAACATTGTCTCAGATTTGTTCCAGAATCTAT  
TGGTTCAGACTTTGCTTGGTTTGTGCTGGACTGTTCCACTAACCTCTTGACTGG  
TCCTGGGGCTCCAGTTTACCTCTTGCTCCCAACAATCAATTTTTCTACAGAACT  
ATGAGCATTCTTTGCTTTCCTCAATCTCAACTCTGTTCAAACTTTTCGGACAGA  
TTTTATGTGACCTAAAGAGGTAGCTGCCTCCCACCCTTCAACACCATTCAAGG  
CTGCATAATTTGAATTCTTACTTTCAGTCACCAGCTCCTCTCACTGTAACAGAG  
ACAGAACTCATTACTTACTCTTTGGCCTTTACTTTCAGGGGCTACTCCTGGGA  
ATGAAATATATATTTGACTGACGACTGTGTTCTGCACTAGCTCTGCCGCCACC  
CAGCCACCCAGGTTTGATCACACCCCCTCTCACCCCTGGAAGTAGCTTGCAAC  
CTGGTTATAGTCTCTTAATATCTATCTATATCTCTCCTACTTGATCACAGATGAC  
ATATAAATGTGTCTTGAAAAAATATACATAAATGGTATACTTTGGCTCTCCCTC  
TAGATTAGTTTTCTATCATTGGATTTTTTAAGATTTATCCCTATGACATAAATAA

GCTATAGTCTTTTCCAATTACTATATTTACATTCATTTATAAATATACATACATTAT  
TCATCCATTCTCTAAGGGTGCAGGCATTTATGTTACTTTCAGGTTTTGCTATTA  
CAGTGTTACAAGATATCCTTAAGCAAGCTGGTCTCTCCTTGTCTTATACAAATTT  
TACTGACATTTCAAGACCACACTTTCAGCCCGGCTCCTGGGGAAAGCCTTCCC  
TAATCCCCAGCCCACAGCCAGCCAGTGCGACCAGGGTTGCTTGCCACATCTGG  
TATCATCCCTACCAAGCACACAGCCTCTTGTAAGTAAGGCACTTAAGAAATAT  
TTCGCTTCACGGATGAACAAATGAATGAATGAATGGGGAATGGCTACTCCGTG  
ATGGCTCTGTTTACTTGTCTGCAGACTTTGGCGCCTTATTTTCTCCTTCTTTG  
ACCTTTGGTCTACTCAGAGCATTCTCTAGCCCTAGCAAAGCAGTGTGTGGA  
TGTGTGGGTGTGGGTGGCAGTGAACCTCACTGGATGAGGACCGCCTCTCCCTG  
CAAGTTCTACAGTCAGCAAACCTCCAGTGCTTGAAGTTCAGAGTCTACCCCACC  
CCCTCCACCTCCACGCCCCTTCTGCTGAGTCAACCCAACCCAGCCACTGCAGC  
CTGATCAGTTAGGCTGCTGGAGAAGGATGCCAGACAGGGCCAGTGAATCATG  
TCTAGATCCCTCCACCGACCAGGCCACTTCTTCTACAGGGAAGCTTCGATTT  
TTAAAGCCATGGGGCCGAGGCCACCCGGCGACAGTGGGGGCAGGGCTTGCAG  
TGGGAGGAGGCGGCTGAGGCGGAAGGACACACGAAGACTTCGCTGCACCGA  
GAAAGTTCAGCCAAACTGGGCGGCAGCTAGAATAGCAGCCGGGGAACTGGCG  
GACTCCGGGACGCAGGGGTCAGGCATTTTGCGCCTGTACCTTTGGACCATGCG  
CCAGGGCCTGGCCTTTAGAAACCAGGAGGAGGGGGAGGGGAGGAAATCGGG  
CTCCTATCGGGACCCCTCCCCATGTGGATCTGCCAGCAGGGCGGCGGGCG  
GCGGCGGCGGCGGCGGCGGCGGCTTTGACGGCAGCAGCGGCAGCGGCGGCGGCG  
GCGGCGGCTGACCCGGCAACGGCAACGGCAGCAGCGGCGGCGAAAAGCGGC  
GGCGGCAACGGCAACACGACGGCGGCGGCGGCGGCGGCGGCGGCGGCGGCG  
GCGGCGGCGGCAACGGCAGCAGCGGCAACGGCGGCGGCGGCGGCGGCGGCGG  
CCAACAGCAGCAACAGCGGCGGCGGCGAAGCAGCGGCGGCGGAGGAAGGG  
GCGGCAACGGAGGGCGGCGGCGGAGGAGAGCGGCGGCGGCGGCGGCGGCGG  
CGGCGGAGGAGGGCGGCGGCGGAGAGCGGCTGTAGAGAGGCAGCAGCGGAG  
GAGGCAGCAGCGGAGGAGAACTGGCATGGCGGCGGCGGAGGGCGGCGGCGG  
CGGAGGAGGCAGCGACGGAAGGCAGCAGCAGAGGAGAGCAGCAGCAGGAG  
GTAACGAGGAGGCGAAAGCGGCGGAAAGGCGGCGGCGGAGGAGGCGGCGGCGG

AGAGGAGAGCGGCAGCGGAGGCGGCGGCGGAGGAAGGGACGGCAGCCGGA  
GGAGGGCGGCAGCGGAGGAATGGCAACGGCGGAGGAGGCGGCAGCAGAAGA  
GGCGGC

**F2-II:3-read 4**

GTCACACCTCCATTTTTTTTTTCTGTTTCTTTAACATTGTCTCAGATTCAATCCT  
TCTGAAATCTACCTTATTAGTTCAGGGTCTTCTTAAATTTCCAGTTTGGACTGTT  
CACTAACTCTGACTGGTCCTAGCTCCAGTTCACCCTCTTGCCCCAACAAATCAAT  
TTTCTACAGAACTATCAGAGCAATCTTCTTTCCCATCAATCTCAACCTGTTCA  
AAAACCTTTCAATAGTTTTATGACCTAAGAGGTAGCTGCCTCCCCACCCTTCAG  
CTTGCCATTCAAGGCCGTATAATTTGGTCCCAACCCCTTTCCGTCATTCTTGAC  
TCTCCTCACTGCTAACAGAGACAGAACTCATTTACTTACCTTTGGATCGTACCT  
TTGCTTTCACGTAGGGCTCTTCCCTGGAATGATATGTCCATACTAATATTGTTG  
CTGTTGTTCTTACTTTTAGCCTTTCAGCCACTTGTACCCAGGTTTGATCACAC  
CCCTACCTCCTGCCTCCCAAAGCAATCACTATTCTGGTTATAGTCTCTTAATATC  
TATATCTATATCTATATATATGCATCCACAGATAATGTGTAGTATTGTCTTGAAAA  
ATATACACAAATGGTATACTTCTGTTCTCTCATGTATTAGTTTTTTCATATCATT  
TAGTTTTATGATTTATCCTTATTGACATACAAATAGCTATAGTCTTTTTCAATTAC  
TGTGTTGCATTTCAATTTATAAAGGAGTACTATACATTATTCATCCATTCTCTAAG  
GGTGGGTATTTATGTTGTTTTCAAGGTTTTGCTATTACAGTGTTACAAATTTAAT  
ATCCTTAGCTTAGCTGGTCTCCTGTCTTATGTTAAATTTTGCATTGACCTTTCAA  
GATCCTGCTTTCATCCCAGCTCCTCTGGGAAAGCCTTCCCTGAATCCCCAGCC  
CACAGCGCAAAGTCTTTGGTACTAAAGTTGCTTGTGCATCTTTGGTATCATCCC  
ACTGCTGCCAACACAGCCACGCAGTAAGGCACTTAAGAAATATTCGCCACACG  
GATGAACAAATGAATGAATGAATGGGGTGCACCACCGTGATGGCTCTATTCTT  
TTTTAATGGACTTATGCCTTGGCCCACTTCTTCTTTGACAGCACTGTCCTACCC  
AGAGCATTCTCTAGCTAGCAAAGCAGTGTGTGGATGTGTGGGTGTAGGTGGC  
GATACAGACTCACTGGATATGAGGGACCGCCTCTCCCGGTAAGTTCACGATCC  
CGGCAACCCAGTGCTTGAAGTCTAGAGTCCTATCTTCACCTCACCTCCACGCC  
ACCTTCTGCACTGGCTGGGTTAGGTGAGCCGCTGCAGCCCTGATCGAGTTAAG  
GCTGCTGGAGAAGGGATGCGGATTGCAGCCAGTGACTCGTAGTAGATCCCTCC



GCGAGCCTGGGCCGGCGCTTTCTTCCCGTGGGAACCCCTGGTGCCCAAGGCG  
GCGGGGCTGAGGCCGCGGGACAGTGTGTGGGCGGGCTTGCGGTGGAGGAG  
GCGGCTGAGGCGGAAGGATACGAGGTTGCTTCGCTGCACACCTGAGAAAGTT  
TCAGCCAAACTTCTGGGCGGGCGGCTGAGGCGGGCGGCTGAGGAGCGGCGTGG  
ACTGGGGCGGGGAGTCGAGGCATTTGCGCCTGTGCTTCGGACCGTAGCGCCA  
GGGCCTGGAGCCTTTGGGGCAGGAGGTGAGGGGAGGGAGAGGCCTCTATCGG  
GACCCTCCCATGTGGATCTGCCA **GCGCGCGGGCGGGCGGGCGGGCGGGC**  
**GGCGGGCGGGCGGGCGGGCGGGCGGGCGGGCGGGCGGGTGGCGTGGCGGGCGG**  
**GCGGGCGGGCGGGCGGGCGGGCGGGCGGGCGGGCGGGCGGGCGGGCGCAAGGGGCA**  
**AGGGCGGGCGGGTGGCGGGCGGGTGGCGGGCGGGCGGGCGGGTGGCGGGCGGGC**  
**GGCGGGCGGGTGGCGGGCGGGCGGGCGGGCGGGCGGGCGGGTGGCATGGCGGGTGGC**  
**GGGGTGGCGGGCGGGCGGGTGGCGGGCGGGTGGAGGAGGTGGCGGGTGGAGGA**  
**GGGGCGGGCGGGGAGGGAGGTGGCGGGTGGAGGAGGGTGGTGGTGGAGGA**  
**GGTGGTGGCGAGGGAGGGCGGGTGGCGGAGGAGGTGGCGGGTGGAGGAGGTGGG**  
**TGGTGGAGGAGGGTGGTGGCGGAGGAGGGCGGGTGGCGGAGGAGGTGGCGGGTGG**  
**GAGGGAGGTGGCGGGTGGAGGAGGGCGGGCGGAGGAGGTGGCGGGCGGGAGGAG**  
**GTGGCGGGTGGAGGAGGGGTGGCGGGTGGAGGAGGGCGGGTGGTGGAGGAGGGCGG**  
**CGGGCGGAGGAGGGCGGGCGGGCGGAGGAGGGCGGGCGGGTGGAGGAGGGCGGGC**  
**GGAGGAGGTGGTGAAGTGGAGGAGGGCGGGCGGGCGGAGGAGGGCGGG**

**F2-II:3-read 5**

GGAAGGACTACAGGAGTCATTCCAAGCCAAAGGAACAAAAGATACAGGGA  
CAGAAACAGCAAGATATGTTTGGGGGAATCTCAAGTTAGCTAATACTGTTATTG  
TGTGAAGTCTACAACAGGCAGGGAGGACAGAGATGGGCCCAATGACTAAAAG  
GCCTTGTGGCTGTACCAGTTTAGAAGTTTGAATTTTATCCTATAGGAGTCAGGG  
AGAGGTTCTATGGGTAGGATTTCCCATCCCAACAGGATTGTAAACTCCTCACAT  
CCAATTAGTCACACTCATTNTTTTTTTTTTCTGTTTCTTTAACATTGTCTCAGAT  
TCATTCTTCTGAAATCTACCTTATTAGTTCAGGTCTTCAAATTTGTGCCTGACTG  
TTCACCAACTCTTGACTGGTCCTGGGCTCCAGTTCACCTCTTGCTCCTAACAAAT  
CAATTTCTACAGAACTATCAGAGCAATCTTTCCTTTCCATCAATCTCAACTCTG  
TTCAAAAAAATCTCACAGTTTTATGACCTAAGAGCAGTAGCTGCCTCCCACCC



CGGCGGCGGTGGCGGGTGGCGGTGGCGGTGGCGGCGGTGGCGGGCGGTGGC  
GGCGGTGGTGGCGGCGGCGGCGGCGGCGGTGGCGGTGGCGGTGGCGGTGGC  
GGTGGTGGCGGCGGGAGGAGGTGGCGGCGGGAGGAGGCGGGCGTGGCGGAG  
GGGAGGGTGGCGGCGGAGGGAGGTGGCGGCGGAGGTGGCGGTGGAGGGAG  
GGTGGCGGCGGGAGGAGGCGGCGGCGGAGGAGGCGGCGGGTGGAGGAGGC  
GGCGGCGGAGGGAGGGCGGCGGCGGAGGAGGCGGCGGCGGAGGAGGCGGT  
GGCGGAGGAGGCGGCGGCGGAGGAGGCGGCGGTGGAGGAGGCGGCGGCGG  
AGGAGGCGGCGGCGGAGGAGGCGGCGGCGGAGGAGGCGGTGGCGGCGGAG  
GAGGCGGCGGTGGAGGAGGTGGCGGCGGAGGAGGCGGCGGCGGAGGAAGG  
AGGAGGCGGCGGGCGGAGGAGGCGGC

**F4-II:2-read 1**

GTGGTGTCTGGGCAAAGCCCTCTCTTTGACTGGAAGGGATGAATTATGATTTTTC  
AGGAAGTTCATTAAGAGGAGGAGGAAGGGGACTACAGGAGTCATTCCAAGCC  
AAAGGAACAAAAGATACAGGACAGAAACAGCAAGATATGTTTGGGGGGAA  
CTCAAGTTAGCTAATACTGTTATTA AAAAGAAGTCTACAACAGGGGCAGGGAG  
GACAGGAGATGGGGCCCAATGACTAAAGCGGCCTTGTATGTACCATGTTTAGA  
AGTTTGAATTTTATCCTATAGAGTCAGAGAGGTTTCATGGGTGGATTTCCCATCC  
CAACAGGATTGTAAACTCCCACATCCAATTAGTCACACCTCCATTTTTTTTTTC  
TGTTTCTTAACATTGTCTCAGATTCATTCCCTTCTGAAATCTACCTTATTAGTTC  
AGGTCTTCTTAAATTTGTGCCTGGACTGTTCACTCAACTCTTGACTGGTCCTAA  
ATCTAGTTCACCCCTTGCTCCCAACAATCAATTTTCTACAGAACTATCAGAGCA  
ATCTTCCCTTTCATCAATCTCAACTCTGTCTAAAAAACTTTCAATAGTTTTATG  
TGACTTAAGAGGTAGCTGCCTCCCCACCCTTTCAGCTTCTTGCCATTCAAGGC  
CGTGAAGCAATTTGGTCCCAACCCCTTCTTCCGGCCCTTGACTCTCTCACTGCT  
AACAGAGACAGAACTCATATTTACTTACTCTTTTGACTTTCCGTACCTTTGCTT  
TCACGAGGCCCTTCTTGGAAATGATATGTCCATAACAACCATGTTGTTGTTCTTA  
CTTTAGCTCTTTTCTTAGCCCACTTGTACCCAGGTCGCGATCACACCCCTACTC  
TCCTGCTCTGAAGTAACTACTATTCTGGCGATAGTCTCAATATCTATATCTATATC  
TATATATGCATCCACAGATAATGTGTAGTATTGTCTTGAAAAAATATACATAAA  
TGGTATACTTGTCTCCCTTACATTAGTTTTTTTTTCATCACTATCATTGTTTTTA

AGATTTATCCTTATTGACATAAATAGCTATAGTCTTTTTCAATTACTGTGTGTTGC  
ATTTCATTTTATAAATATACTATACTATTATTCATCCATTCCCTCTCATATAAGTGGGC  
ATTTATGTTGTTTTCAAGGTTTTGCTAGCTACAGTAAGTTACAATAATATCCTT  
AGCTTAGCTGGTCTCCTTTTTGTCTTATACAAATTTTACTGACCTTCAAGATCCTG  
CTTTCAGTCCTGGCTCCTCTGGAAAGCCTTCCCCTGAATCCCCCAGCCCACAA  
AGTTCAGTACCAAAGTTGCTTGTGCATCTGGTATCATCCCACCGCGTTGCCATT  
AATAGCCACGCAAAGTAAGGCATTTAAGAAATATTCTCACATGGATGAACAAA  
TGAATGAATGAATGGGGGCAGCACCACCCGTGATGAAGCTCTATTCCCTTTTTA  
ATGGACTTTATGCCTTGGCCCACTTTCCTCTTTGACAGCACTGGTCCTACTCAG  
GAGCATTCTCTCTAGCTAGCAAAGCAGTGTGTGGATGTGTGTGTAGGTGGCGA  
TACAGACCACTGGATGAGGACCGCCTCCCCTGCAAGTTCACGATCCTGGCAAC  
CCAGTGCTTCAGTTCAGAGTCCTACCCACCCCCCACCTCCACGCCCTTCTG  
CACCGGTCGCTTGC GGAGCCGCTGCAGCCTCTGATCGAGTTAAGGCTGCTGAG  
AAGGATGCGGACGGCCAGTGA CTG TAGCAGATCCCTCCGCGCGGAGCTCAC  
GGCGCTCTTTCCTGCGGGGAAACCCCTGGGTGCCCAAGGGCGGCGGCTGAGG  
CCGCGGCGACAGTGGGCGGGGCTTGC GGTGGGAGGAGGCGGCTGAGGCGGA  
AGGACACACGAGGCTGCTTCGCTGCACACCTGAGAAAGTCAGAAACTGGCG  
GCGGCGAGGTGGCGTGCCGGTGGAGCGTGGACTTTGTGCGGGGGAGTCGAG  
GTATTTGCCCTGTGCTTTCGGGAAGTGCTGTGGCTTGAGCTTGAAGCAGGAGGA  
GGGGAGGAGGGTTTTCTATCGGGACCCCTATGTGGATCGCCCA GGTGGTGGTG  
CGGTGGCGGTGGTGGCGGCGGTGGCGGCGGCGGGTGGTGGCGGGTGGTGGT  
GGTGGTGGTGGTGGTGGTGGTGGTGGTGGTGGTGGTGGTGGTGGTGGTGGT  
GTGGTGGTGGCGGTGGTGGTGTGTGGTGGGTGGTGGTGGTGGTGGTGGTGGT  
GGTGGTGGTGGTGGTGGTGGCGGGTGGCGGTGGTGGTGGTGGCAGGCGGGTG  
TGGTGGTGGTGTGGTGGCGGTGGTGGTGGCGGGGCGGTGGCGGTGGCGGTGGC  
GGTGGTAGTGGCGGCGGCGGCGGGTGGCGGTGGCGGCGGGCGGCGGCGGCG  
GC

**F4-II:2-read 2**

GGGCAGATTCTATCCCAACAGGATTGTAAACTCCACATCCACCCTAGTCACA  
CCTCCATTTTTTTCTGTTTCTTTAACATTGTCTCAGATTCATTCTTCTGAAATCT

ACCTTATTAGTTCAGGTCTTTAAATTTGTGCCTGACTGTTACCAACTTGACTG  
GTCCTTGGGGCTCCAAAGTTCACCTCTGTTGCTCCCCAACAATCAACTCTTTCT  
ACAGAACTATCAGAGCAATCTTCTCCTTCCAGCATCAATCTCAACTCTGTTTCA  
AACTTTCATTAGTTTTATGTGACCTAAGAGGTAGCTGCCTCACCCCTTTCAGCT  
TCGCTATCCAAGGTTGCATAATTTGGTCCCCAACCCCTTCCGCCCTTGACTCCT  
CACTGCTAACAGAGACAGAACTCATTACTTACTCTTTGACTGTACCTTTGTTT  
ACGAGGCTCTTTTCCTGAATGATATGTCCATACTAATTTGTTGTTGTTCTTACT  
TTAGCCTTTTCTGAAATTACTTGTACCCAGGTTTGATCACACCCCTACCTCCT  
GCTCCTGGAAGTAACTACTATTCTGGTTATAGTTCTTACTATCTATATCTATATCT  
ATATATGCATCCACAGATAATGTGTAGTATTGTCTTGAAAAATATACATAAATG  
GTATACTTTATTCCCTCTGTATTAGTTTTTCACTATCATTAGTTTTTAAAGATTT  
ATCCCTATTGGATATAAATAGCTATAGTCTTTTCAATTACTGTGTTGCATTTCAAT  
TCATAAATATACCATAACATTATTCATCCATCCTCTAAGGGTGGGCATTTATGTTG  
TTTTCTAAGGTTTTGCTATTACAGTTACAATAATGTTCCCTTAGCTTAGCTGGTC  
TCCTTGTCTTATACAAATTTTACTGACCTTTCAAGATCCTGCTTTCATCCCAGCT  
CCTCTGGGAAAGCCTTCCTGAATCCCAGCCCACAGCGGCAGTAAAAGTCTTG  
GTACTGTGCTGCTTGCATCTTTTGGTATCATCCTAATGTTAAGCAATACGCTACG  
CAAAGTAAGCGTTAATTTAAGAAATATTCACACATCGGATGAACAAATGAAGA  
ATGAATGGGGGCAGCACCACCCGTGATGGCTCTATCTTTTAATGACTTTATGCC  
TTGGCCCACTTTCCTTTTGACAGTACTGTCCTACTCCAGAGTATCTCTAGCTAG  
CAAAGCAGTGTGTGTGGATGTGTGGGTGAGGTATATACAGACCTCATTACGAG  
GACCGCCTCCCTGTAAGTTCACGATCCCGGCAACCCAGTGCTTGAAGTTCAGA  
GTCCACCCACCCCTCACCTCCACGCCCTTCTGTACCATCAAGCAGAGCCGCT  
GCAGCCCTGATCGAGTTAAGGCTGCTGGAGAAGGATGCGGACGGGCCAGTGA  
CTGTAGTAGATCCCTCTGCGCGGAGCTCGCCGCGCTTCTTCCCGCAGGGAAA  
CCCCTTGGTGCCCAAGGTAAGGGGCTGGAGCGTGGCGACAGGGAAGGGGCTT  
GCGGTGGGAGGAGGCGGCTGGAGGCGGAAGGACATGAGGTTGCCGCTGCAC  
CCGAGAAAGTTTCAGCCAACTTCGGGCGGTGGTTGAGGCGGCGGGCCGAGG  
AGTGCGACTTCGGGGCGCGGGAGTCGAGGATGGTGCCTGTGGGCTGGACTGT  
AGCGCCAGGGCCTGGAGCTTTTGAAGCAGGAGGAGGGGAGGAGAGAGGGTT

TCTATCGGGACCCTTCCCTATGGATTCGTTTCA GGTGGCGGCGGTGGCGGTGC  
GGTGGTGGCGGTGGTGGTGGTGGCGGTGGTGGTGGCGGC GGCGGTGGTGGCG  
GTGGTGGCGGTGGTGGCGGCGGTGGTGGTGGCGGC GGCGGTGCGGCGGC  
GCGGTGGCGGC GGCGGTGGTGGTGGCGGTGTGGCGGGTGGCGGTGGCGGC  
GTGGTGGTGGTGGCGGGCGGTGGCGGC GGCGGC GGCGGTATGGTGGCG  
GGCGGC GGCGGTGGCGGC GGCGGC GGCGGGTGGTAAGTGC GCGCGCGC  
GGTGGCGCGGC GGCGGC GGCGGC GGCGGC GGCGGC GGCGGC CAGGC GGCGGC

**F4-II:2-read 3**

GACTACAGGGGTGTTCCAACCAAAGAGACAAAGATGCAAGACAGAAACAAC  
CAGTTATGTTTGGGAATCTCAGTTAGCTGATACTGTTGTTGACAGTTAAACAG  
GGCAAGGAGGACAGGAGATGGGCCCAATGAAACCTTATATATGCCATGTTTA  
GAAGTTTAGATTTTATCCTGTAGAGGTCGAGGGAGAGGGTTGTGGTTCCACA  
TCCCAACAGGTTATAAGCTCCACGTCAATTGATCACACCTCCATTTTTTCTATT  
TCTTAACATTGCTCCTCAGATTCATTCCTTCTAAAATCCCTACCTTATTAGTTCA  
GATCTTCTTAAATTTATTGCCTGGACTGTTCACCCAACTCTTCAGCTGGTCCCT  
GGGGGCTCCAGTTCCTGCCTCCCCCAACAATCAATTTCTACAGA ACTATCAGA  
GCAAATCTTCCACTCCATCAATCTCAACTCTGTTCAAAA ACTTTCCAATGGTTT  
ATACTTGACCTAAGAGTGGCTACCTCCCACCTTTCAGCTTTGCCATTCAAGGCT  
GCATAATTTTGGTCCCAACCCCTTTCGTC ACTTGACTCCTCCTGCTAACAGAG  
ACAGA ACTCATTTCGCCTCTTTTGAGCTGTACCTTTGCTTTCTGGGGCTCTTTC  
CTGGAATGATCATGTCCTTCAACTATTTATTTGTTGTTCTTACTTTTTAGCTCTTT  
TCTTGGCTGCTTGCTGATTTTAATCACCCCTCTCCTGCCCTGGGAGTAACTGC  
TATTCTAGTTATAGTCTCTTTTAATATCTATATCTATATCTATATATAGCCGTCCAC  
AGATAATGTGTAGTATTATCTTGAAAAAATATACATAAATACTTGTATACTTTGT  
CTCCCTCTAGATTAGTTTTTTCCATATCATTTTG TAGTTTTTTAAGATTTATCCTAT  
TATTGACATGAAATAGCTATAGTCTTTTTCAATTCTGTGTGCATTTCATTTTATAA  
ATATACACAGCATTATTCATCCATTCTCTAAGGGGTGAGGCATTTATGTTATTT  
CAAAGTTTTGCTGACTTACAGTGTTACAAAAATATCTTCCAACA ACTGGTCTCC  
TTGTCTTATGCAAATTTTACTGTTATACCAAAGGATCCTGCTTTCATCCAAGCTC  
CTCTAGGAAAGTAACCCTAAGATCCCCCAATAATGACAAGTCTTAGTATAAAGT

TGGCAGCCATCTTTAGTATCCATCACTACCAAACACAGCTACACCAAATGAGC  
ACTTAAGAAATATTCACACTACAGATGAACAAATAGATGAATAGATGGGGCAGCA  
CCATCCGTGATAAATATTCCTTTTTAATGGACTTTGGCGCCTTGGCCCTTTCATG  
TGACAGCACTGGTCCTACTCAGACATTCCTCTAGCTAACAAATGGTGGCCAAC  
TGGATGTGTGGGTGTAGTGGCGTCTGAACCTCACTGGATGAGGACCATAACCTC  
TCCTGCAAGTTCACGATCCAGCAGCTCAGTGGCCGGGATTCAGAGTCCTGCC  
CACCTGCCTCCACGCCCCTTCTGCACTGGTCAAGCCCAGCAGGCCACTGCA  
GCCTGATCGAGTTAAGGCTGTACTGGAAAGGATGCGGACAGGGCCAGTGACT  
CGTAGTAGATCCTCACTTTGGAGCTCAGGCAGCCTTCTTCCTGCAGGGAAACC  
CCTGGGTGCCCAAGGAGGCAGCGGGGCCGGGCCACGCAACGACAATCAGGA  
AGACAGGGGCTTGCAGTGGGAGGGAGGCGGCTGGGGCGGGGAAGGGACTACA  
CGGGCTGCTTCGCTGCACACCGAGAGAGATTCAGCCAAACTTCGGGGCGGC  
AGCTGGGGCAGCAGCCGAGGCCGGCACAGACTCAGGGCATGAGGAGTCAAG  
GGCATTGCCTGGCTGGTTCCTCCGCCATGGCGCAGGGCCTGAGCCTTTGAAGTAG  
GGAGGAGGAGATGGGGCTCCTCTATCAGGACCCCAACATGTGGATCTGCCCA  
GCGGCGGCGGCGGCGGCGGCAGCAGCGGCAGCAGCGGCGGCTGGCGGCGGCGGC  
AGCGGCGGCGGCTAACGGCAACAGCACCAAGCAACAACGGGCGGCGGCGGCGG  
CGGCAGCAGCAGCAGCAGCAGCAGCGAGCAGCAGCAACGGCAGCAACAGCAGCA  
GCAGCAGCGGCGGCAGCAGCAACAGCAACAGCAGCAACAGCAACAACAGCA  
ACCGGCAACAGCAACAGCAACAACAACAGCAACAGCAGCAGCAGCAGCAAG  
CAGCAGCAGCAGCGGCAGCAGCGGCGGCAGCAGCAGCAGCAGCAGCAGCAGCAG  
CAGCAGCAGCTTGTGGCAGCAGCGGCGGCGGCAGCAGCAGCAGCAGCAGCA  
GCAGCAGCAGCAGCAGCAGCAGCAGCGGC

**F4-II:2-read 4**

GAAGACAGTGGAGGACTATATATTAGAGGAGAATTTATTGTGGTGTGACTGAC  
CTTCTCTTTGGACTGAGAAAAATTGAATTATGATTAAGTTCATTAGAGGAGGAG  
GGAAGGGGACTACAGAGTCATTCAAGCCAAAGACAAAAGATACAGGGACAG  
AAACAGCAAGATATGTTTGGGGGAATCTCAGGATTGGCAATACTACATTATTGT  
GAAGTTCACAACAGGGGCAGGAGGACGGAGATGCAGAATCTCAGTTCTATGG  
GTGAAGTTTCCATCCCAACAGGATGTAAACTCCCATCCAATTAGTCACCTCATT

TTTTTCTGTTTCTTTAACATTGTCTAGATTCATTCCTTCCCAAATCTGTAATAGT  
TCAGGTCTTCTTAAAATTTTGCCTGGACATTCACCAACTCTTGACGCCTGATTT  
TCCAAGACCAGTTGCTCTTGCTCCCAGCAATCAATTTTCTACAGA ACTATCAGA  
GCAATCTTCTTTATCAAGTCTCAACTCTGTTCAACTTTCAATAGTTTTATGTGAC  
CTAAGTGGCTGCCTCCCCACCCTTTCACGCTTTGCAATTCAAGGCTGCATGA  
ATTTGATTATTGCCTAGGTCCTTGACTCCTCTCACTGCTAACAGAGACAGAAGC  
TCATTTGCCTCTTGACTGTTACCTTTTTGCTTTCCACGAGGCTCTTTCCTGGAAT  
GATATGTCCATAACAAGCATTATTTATTTCTTGCTGCTCTTTTCTTATTTTTGTAC  
CCAGGTTTGATCCACCCCTACTCTACATGGAGTAACACTATTCTGGTTATAGT  
CTCTTATTTATCATATCATATCTATATATATACATCCACAGATAATGTAGTATTAT  
CTTGAAAAAAAATATACATAAATGGTATCTTGTCTCACTATAGATTAGTTTTTAC  
TTCTATAAATTTAGTTTTAAGATTTGTCTAATACAGAGCATAAATAGCTATAGTCT  
TTCTCAATTACTGTGTTGCATTCATTTATAATATAACCATACATTGTTAATGCATTC  
CTCTAGAGGTGGGGCATTATGTTGTTTTCAAGTTTTGCTATTACAGTGTTACA  
ACGAATATCCCTTATAAATAGCTGGTCTCCTTGTCTTATACAAATTTTACCCCGA  
CTTTCGAGATCCTGCTTTCATCCCAGCTCCTCTGGGGAAAGCCTTCCCTAGATC  
CCTGACTGGCAGCAAAGTCTCCTCAAAAATTTGCTTGCATGCATCTTTGGTATC  
ATCCACTATAATACAGCTGCATAAAGTGAGCCACTTAGAAATATTCTTCCACGG  
ATGAACAAATGAATAGATGAATGGGCCAGCACCCTCCGTGATGGCTCTATTC  
CTTTTTAATGGACTTTGGCGCCTTGGCCCACTTTCCTTCTTTGACA ACTGGTCC  
TACTCCAGGCATTCTCTAGCTAGCAAAGCAGTGTGGATGTGTGTGGGTGTGG  
GTGGCGATACGAACCTCACTGGATGAGGGACCGCCTCCTGCAGGTTACGATC  
CCAAACTCCAGTGCTTGAAGTTCAGGGTCCTACCCACCCCTCTCCGCCCTT  
CTACTTTGTGGTCAAGCCAGCAGGCCGCTGCAGCCCTGATCGAGTTAAGGCTG  
CTGGAGAAGGATGTTGGACAGGGCAATGACTCGTAGTAGATCCCTCGCGCGG  
GCTCGGGCCGGCGCTTCTTCTGCAGGAAACCCCTGGGTGCCCAAGGCAGG  
GGCCGAGGGCCACTTGACGACAGTGGGAAGACAGGCTTACCTGCAGTGGGA  
GGGAGGCGGCTGAGCTGAAGGACACACAGGAAAGCTGCTTCGCTACACTGA  
GAAAGTTTCAGCCAACTTCGGGCGGCGGCTGGGGCGGCAGCCGAAGACGG  
CGGACTCAGGGCGCAGGGGAGTCGAGGCATTGCGCCTGTCGCTTCGGACCGT



AGCGCGGGGCTGGGCGCTGGAAGGCAGGAGGAGGAGAGAGTGGGGCTCCT  
TATCGGGACCCCTCCCCGTGGATCTGCCCA**GGCGGGCGGCGGGCGGGCGGC**  
**GGCGGGCGGCGGCAGCGGGCGGCGGGCGGGCGGGCGGGCGGCAGCGGGCGGC**  
**GGCGGGCAGCGGCAACGGCAGCAGCTGGCCCCGGCAGCGGCAGCGGGCGGGCGGC**  
**GGCGGGCAGCGGTGGCTGGCGGTGGTGGCGCGGGCGGCCCGGCAACGGCAACG**  
**GCGGCAGCGAAGGCGGGCGGGCAGCAGCGGGCGGGCGGGCGGGCGGGCGGGCA**  
**ACGGCAGCAGCGGGCGGCAGCGGGCGGGCGGGCGGCTGCGGGCGGGCGGGCGGGCG**  
**GCAACGACAGCAGCGGGCGGGCGGGCGGGCAACGGCAGCGGGCGGGCGGCAGCGGGCA**  
**GCGGCAACGGCAGCAACAGCAACAGCAGCAGCAGCAGCGGGCAGCGGGCAGCG**  
**GCAGCGGCAGCGGGCGGGCGGGCAGCGGGCGGGCGGC**

**F4-II:2-read 5**

GAGTCAGGGAGAGGGTCTATGGGTTGCAGTTCCCATCCCAACAGGATTATAC  
AAGCTCCACATCAATTAGTCCACCTCCATTTTTTTTTTCTGTTTCTTAAACATT  
GTCTCAGATTCATTCAACTTCTAAATCTACCTATTAGTTCAAGTCTTCTTAAAT  
TTGTACTGGACTGTTACCAACTCTTGACTGGTCTGGGGCTCCAGTTCACCTC  
TTGTAACAATCAATTTTCTACAGAACTATCAGGTAGTCTTTGCTTTCCATCAATC  
TCAGCTCTGTTCAAAAACCTTTCCAATAGTTTATGTGACCTAAGAGGTAGCTGCC  
TCCCCACTTACTTTCAGCTTGCCATTCAAAGGCTTGCATAATTTGTGATCCCAC  
AACCCTTTTCCGTCCTTGACTCCTCTCCTGCTAACAGAGACAGAACTCATT  
ACTTACTCTTTTACTGTACCTTTGCTTTCCCGAGGCTCTTTCCTGGAATGATAT  
GTCCAAAAGCCCCCAACTGTATTGTTATTTCTTACTTTAGCTCTTTTCTTAGCCC  
ACTTGTACCCAGGGTTTGATCCACCCCTACTCTCCTGCCTGGGAGTAACTACTA  
TTCTGGTTATAGTCTCTTAGCCTCTATATCTATGTCTATATGTGCATCCACAGATA  
ATGTGTAGTATTGTCTTGAAAAAATATACATAAATGGTATGCTGTCTCCTAGAT  
TAGTTTTTCACTATCATTTTGGTTTTTAAGATTTATCCTATTGACATAAATAAGCT  
ATAGTCTTTTCAATTACTGTGTTGCATTTCATTTTACTAAATATAACCATACATTAT  
TCATCCATTCCCTAAGGGTGGGCGTTGCAGCAACATTTTCAAGGTTTTTACTA  
TTACAGTGTGTGAATATCCTTAAAAACAGCTTTTGAGTCTCCTTGTCTTATACA  
AATTTGCCCCAGCCTTTCGAATCCTGCTTTCATCCCAACTCCTCTGGAGAAGCG  
CTTCTGGTCCCCCAGCCACAATGACAAAATCTTGGTACTCCAAAAGTGTAT

GCATCTTTGGTATCATCACTGCCAAGCTTACACAGCTACATAAGTAGGCAGCAA  
AATATTCGCTACACGGATGAACAAATGAATGAATGAATGGGCAGCACCCTCA  
CGTGATGGCTCTATTCCTTTTAATGGACTTTGGCGCCTTGGCCCCTTTCTTCT  
TGACAGCACTGGTCCTACTCCAGAGCATTCTCTAGCTAACTTCGAAAGCAGT  
GTGTGGATGTGTGGCGAATTGTAGGTGGCGATACAGACCTCACTGGATGGGGA  
CCGCCTCTCCTGCAAGTTCACGATCGAAGAACTCCAGTGGCAGGTTCGAGTCC  
TCCACCCCTCACCTCCGCCCTTCTGCACTGGGTGAAGCTGGCGAAAGGCTGC  
TGCAGCCTGATCCGATTTAAGGCTGCTGGGAGGAAGGGATGCGGACGGGGCC  
AGTGACTCGTAGTAGATCCCTCCGCGCGGAGTCGGGCCAGCGCTTCTTCTGT  
GAGAAACCCCTGGGTGCCCAAAGGCAGCAAAGACCCGAGGGCCGCGGCTCA  
ATGGGACAGGGCTTGCGGTGGGAGGGAAGCGGCTGAGACGGAAGGGACCCC  
ACACGAGGCTGGCCTTCACTGCCGGAAGGTTCAATGAAACTTCCGGGCGGGC  
GCTGACGGCAGCCGAGGGCGGGCGGCGGACTCAGGGGCGCGAGGTCGGGC  
ATTTGCGCCTGTGCTTCGGACCGTAGCGCCAGGGCTTCTGAGCCTTTGGAAGC  
AGGAGGAGGAGAGAGTGAGAGGGCTCCTCTATCAGGACCCCCCTCCCATGT  
GGATCACAGGCGGCGGGCGGCATGCAGCAGCGTGGCAGCAGCAGCAGCG  
CGGCAGCCAGCGGCAGCAGCAGCAGCGGGCGGGCGGCAGCTGGCAGCGGCAGC  
GGCGGGCGGGCGGCAGCGGGCGGGCGGGCGGGCGGGCGGGCGGGCGGCAGCAGC  
GGCGGGCGGGCGGGCGGGCGGGCAACGGCGGGCAACGGCAGCGGGCGGCAGCAGC  
GGCGGGCGGGCGGGCGGGCGGGCGGGCGGGCGGGCGGGCGGGCGGGCGGGCG  
GGCGGGCTGGCGGGCGGCACGGCGGGCGGCACGGCGGGCAACGGCAGCGGGCAGCA  
GCAGCGGCAGCAGCAGCAACGGCAGCAACAGCAACGGCAGCAGCAGCAGCA  
GCGGCAGC

**F4-II:2-read 6**

GGCAGGTCTATGCCTATACTGACTTGTACTTGCTTAGTGTTGTTTACATTCTAGT  
TCAACATCTATTGCGGATAGGACACTCGGGGGATTAATAGGCTGTGGTCTCTTG  
CCCACAGAGACCCCGTTAAACTTAGTTGAGAAACACAGGAAACAAAGAGTC  
CTGTGTGAAAAATAAGTATTGGTGTTAAGATGCAGTGAAGACAGTGGAGGGA  
CTGTCTGTTAGAGGAGGAATTTATTGTGGTGTGCGCAAAGCTCTTGGATTGAA  
GGATGAATTATGATTAGAAGTTCATTACAGAGGAGGAGGGAAGGGGACTACAG

GAGTCATTCTGAAGCCAAAGGAACAAAAGATACAGGGACAGAAATAGCAAGA  
TGTTTGGGGGAATCTCGTTACTACTGTTATTGTGTGAAGTTCACAACAGGGGTA  
TAGGGAGGACAGGATGGGGTCCAATGACTAAAAGGTCTTGTATGTACCATGTT  
TAGAAGTTTGAATTTTATCCTATAGGGAGCTAGGAGAGGTTCTATGGGTAGGAT  
TTCCATCCCAACAGGATTGTAAACCCACATCCAATTAGTTTCACCTCCATTTT  
TTTTCTGTTTCTTTAACATTGTCTCAGATTCATTCCCTTCTGAAATCTACCTTAC  
GAATTCAGGGTCTTCTTAAATTTGTGCCTGGACTTCACTAACTCTTGACTGGTC  
CTGGGGGGCTCCAGTTCACCTCTTGCTCCCAACAATCAATTTTCACAGA ACTAT  
CAGAGCAATCTTCCCTCCATCAATCTCAACTCTGTTCAAATCTCAATAGTTTT  
ATGTGACCTAAGAGGTAGCTGCCTCCCACCCTTTCAGCTCTGCCATTCAAGGC  
TGCATAATTTGGTCCCACCCCTTCCGGCCCTGACTCACTGCTAATAGAGACAGA  
ACTTCATTTACTTACTCTTTTGACTGTACCTTTGCTTTTACTTAGGGCTCTTCCT  
GGAATGATATGTCCATACAACTATTGTTACATTTTACTTTAGCTCTTTTCTTAGCT  
CATTTGTACCCAGGTTTGATCACAATTCCCCCTACTCTCCTGCTCCTGAAGTAA  
CTACATTATTCTTATTATAGCTTTTAGTTATTATATTAGGTTATAGGTGTACCATGG  
AGCATGTGTAGTATTGTCTTGAAAAAATATACATAAATGGTATACTTTTGTCTC  
CCTCACATTAGTTTTTTCTTACTATCATTTAGTTTTTTAAGATTTATCCCCATTGG  
AGTGTAATAGCTATAGTCTTTTCAATTACTGTGTTGTACTTCCTCATTTTTATAA  
ATATACCATACATTATTATCCATTCCTCTAAGGGTGGGCATTTATGTTGTTTCTCA  
AGGTTTTGCTATTACAGTGTGTTACAACGACATCCTTAGCTTAGCTGGTCTCCT  
TGCTTATACAAATTTTACTGACCTTTCAAGATCCTGCTTATCCCAGCCCTCTGG  
AAAGCCTTCCCTGAATCCCCCAGCCCACAGCGCCAGCGGGTAAAGTCTGGTA  
CTCTGTGCTGCTTGTGCATCTTTGGTATCATCCCACTGCTAAGCACACACAGCT  
ACGCAAAGTAAGGCACTTAAGAAAATATTCGCTACACGGATGAACAAATGAAT  
GAATGAATGAAGCAGTACCACTCCGTGATGGCTCTATCTTTAATGGACTTTGGC  
GCCTTTGGCCCACTTTCTCCTTCTTGACAGCACTGGTCCTACTCCAGAGCATTC  
CTCTAGCTAGCAAAGCAGTGTGTGGATGTGTGGGTGTAGGGTGGCGATACAG  
ACCTCACTTCGGATGAGGACCGCCTCCCTGCAAGTTCACGATCCCGGCAACTC  
CAGCGCTTGAAGTTCAGGAGGTTCCACCCCCACCCCTCACCCACGCCCCCTC  
TGCACTGGTCAAGCCATGAGCCGCTGCAGGCCCTGATCGAGTTAAGGCTGCT

GGAGAAGGATGCGGACGGGGCCGCGACTTCGTAGTAGATCCCTTCCGCGCGA  
GCTCGGGCCGGCGCTCTTCCCGTGGAAACCCCTGGGTGCCCAAGGCGGCGTG  
CCGAGGCTGCGGTGGCGACAGTGGGGCGGGGCTTGCGGTGGGAGGAGGTGG  
CTGAGGCGAAGGACACACGAGGTTGCTTCGCTGCACACCTGAGAAAGTTTCA  
GCCAAACTTGGGCGGTGGTGGCGGCTGAGGCGGCGGCTGAGGAGCGGCGGG  
ACTCAAGGGGGAGTCGAGGTATTTGCGCCTCGTGCTTCGGACCGTAGCGCTAG  
GCCTGAGCCTTTGAAGCAGGAGGGAGGGGAGGAGAGAGTGGGGCTCTCTATC  
GGGACTTTCTCATGTGGATTCGCCCA**GGTGGCGGTGGCGGGTGGGCGGCGGC**  
**GGTGGCGGCGGCGGGTGGTGGCGGTGAAAAGTGGCGGCGGCGGCGGTGGCG**  
**TGGCGGCGGCGGCGGCGGGTGGCGGCGGCGGCGGCGGCGGCGGTGGTGG**  
**CGGCGGTGGCGGTGGCGGCGGCGGTGGTGGCGGTGGCGGCGGGCGGTGGCG**  
**GTGGCGGCGGCGGCGGTGGCGGCGGGCGGCGGCAGTGGTGGCGGCGGTGGC**  
**GGTGGCGGTGGCGGCGGCGGTGGCGGCGGCGGCGGCGGCGGCGGCGGTGGT**  
**GGCGGCGGCGGCGGCGGCGGCGGCGGCGGCGGCGGCGGTGGCGGCGGCGGCGG**  
**GGGTGGCGGC**

**F5-II:1-read 1**

GGCAGGTCTATGCCTATACTGACTTGTACTTGCTTAGTGTTGTTTACATTCTAGT  
TCAACATCTATTGCGGATAGGACACTCGGGGGATTAATAGGCTGTGGTCTCTTG  
CCCACAGAGACCCCGTTAAACTTAGTTGAGAAACACAGGAAACAAAGAGTC  
CTGTGTGAAAAATAAGTATTGGTGTAAAGATGCAGTGAAGACAGTGGAGGGA  
CTGTCTGTTAGAGGAGGAATTTATTGTGGTGTGCGCAAAGCTCTTGGATTGAA  
GGATGAATTATGATTAGAAGTTCATTACAGAGGAGGAGGGAAGGGGACTACAG  
GAGTCATTCTGAAGCCAAAGGAACAAAAGATACAGGGACAGAAATAGCAAGA  
TGTTTGGGGGAATCTCGTTACTACTGTTATTGTGTGAAGTTCACAACAGGGGTA  
TAGGGAGGACAGGATGGGGTCCAATGACTAAAAGGTCTTGTATGTACCATGTT  
TAGAAGTTTGAATTTTATCCTATAGGGAGCTAGGAGAGGTTCTATGGGTAGGAT  
TTCCATCCCAACAGGATTGTAAACCCACATCCAATTAGTTTCACCTCCATTTT  
TTTTTCTGTTTCTTTAACATTGTCTCAGATTCATTCCTTCTGAAATCTACCTTAC  
GAATTCAGGGTCTTCTTAAATTTGTGCCTGGACTTCACTAACTCTTGACTGGTC  
CTGGGGGGCTCCAGTTCACCTCTTGCTCCCAACAATCAATTTTCACAGAACTAT

CAGAGCAATCTTCCTTCCATCAATCTCAACTCTGTTCAAATCTCAATAGTTTT  
ATGTGACCTAAGAGGTAGCTGCCTCCCACCCTTTCAGCTCTGCCATTCAAGGC  
TGCATAATTTGGTCCCACCCTTCCGGCCCTGACTCACTGCTAATAGAGACAGA  
ACTTCATTTACTTACTCTTTTGACTGTACCTTTGCTTTTACTTAGGGCTCTTCCT  
GGAATGATATGTCCATACTATTGTTACATTTTACTTTAGCTCTTTTCTTAGCT  
CATTTGTACCCAGGTTTGATCACAATTCCCCCTACTCTCCTGCTCCTGAAGTAA  
CTACATTATTCTTATTATAGCTTTTAGTTATTATATTAGGTTATAGGTGTACCATGG  
AGCATGTGTAGTATTGTCTTGAAAAAATATACATAAATGGTATACTTTTGTCTC  
CCTCACATTAGTTTTTTCTTACTATCATTTAGTTTTTTAAGATTTATCCCCATTGG  
AGTGTAATAGCTATAGTCTTTTCAATTACTGTGTTGTACTTCCTCATTTTTATAA  
ATATACCATACTATTATCCATTCCTCTAAGGGTGGGCATTTATGTTGTTTCTCA  
AGGTTTTGCTATTACAGTGTGTTACAACGACATCCTTAGCTTAGCTGGTCTCCT  
TGTCTTATACAAATTTTACTGACCTTTCAAGATCCTGCTTATCCCAGCCCTCTGG  
AAAGCCTTCCCTGAATCCCCAGCCCACAGCGCCAGCGGGTAAAGTCTGGTA  
CTCTGTGCTGCTTGTGCATCTTTGGTATCATCCCACTGCTAAGCACACACAGCT  
ACGCAAAGTAAGGCACTTAAGAAAATATTCGCTACACGGATGAACAAATGAAT  
GAATGAATGAAGCAGTACCACTCCGTGATGGCTCTATCTTTAATGGACTTTGGC  
GCCTTTGGCCCACTTTCTCCTTCTTGACAGCACTGGTCCTACTCCAGAGCATT  
CTCTAGCTAGCAAAGCAGTGTGTGGATGTGTGGGTGTAGGGTGGCGATACAG  
ACCTCACTTCGGATGAGGACCGCCTCCCTGCAAGTTCACGATCCCGGCAACTC  
CAGCGCTTGAAGTTCAGGAGGTTCCACCCCCACCCCTCACCCACGCCCCCTC  
TGCACTGGTCAAGCCATGAGCCGCTGCAGGCCCTGATCGAGTTAAGGCTGCT  
GGAGAAGGATGCGGACGGGGCCGCGACTTCGTAGTAGATCCCTTCCGCGCGA  
GCTCGGGCCGGCGCTTTCCCGTGGAAACCCTGGGTGCCAAGGCGGCGTG  
CCGAGGCTGCGGTGGCGACAGTGGGGCGGGGCTTGCGGTGGGAGGAGGTGG  
CTGAGGCGAAGGACACACGAGGTTGCTTCGCTGCACACCTGAGAAAGTTTCA  
GCCAACTTGGGCGGTGGTGGCGGCTGAGGCGGCGGCTGAGGAGCGGCGGG  
ACTCAAGGGGGAGTCGAGGTATTTGCGCCTCGTGCTTCGGACCGTAGCGCTAG  
GCCTGAGCCTTTGAAGCAGGAGGGAGGGGAGGAGAGAGTGGGGCTCTCTATC  
GGGACTTTCTCATGTGGATTCGCCCA**GGTGGCGGTGGCGGGTGGGCGGGCGGC**

GGTGGCGGCGGCGGGTGGTGGCGGTGAAAAGTGGCGGCGGCGGCGGTGGCG  
TGGCGGCGGCGGCGGCGGCGGTGGCGGCGGCGGCGGCGGCGGCGGTGGTGG  
CGGCGGTGGCGGTGGCGGCGGCGGTGGTGGCGGTGGCGGCGGGCGGTGGCG  
GTGGCGGCGGCGGCGGTGGCGGCGGGCGGCGGCAGTGGTGGCGGCGGTGGC  
GGTGGCGGTGGCGGCGGCGGTGGCGGCGGCGGCGGCGGCGGCGGCGGTGGT  
GGCGGCGGCGGCGGCGGCGGCGGCGGCGGCGGCGGCGGTGGCGGCGGCGGCGG  
GGGTGGCGGC

**F5-II:1-read 2**

GGGGACTACAGGAGCTGGTCTCCAAGCCAAAGGAAACAAAAAAGATAGGGA  
CAGAAACAGCAAGATATGTTTGGGGAATCTCAAGTTAGCTAATACTGTTATTGT  
GTGAAGTTCAAATAGGGTAGGGAGCAGGTGAGATGTGGGGCCCAATGACGAA  
AAGGCCTTGTATGTACCATGTTTAGAAGTTTTGGAATTTTATCCTATAGGAGTCA  
GGGAGAGGTTCTATGGGTAGGATTCATCCCAACAGGATTGTAAACTCCCAGC  
ATCCAATTAGTCACACCTCCATTTTTTTTTCTGTTTCTTTAACATTGTCTCAGA  
CTATTCCTTCTGGAAATCTACCTTATTATTAGTTCAGGTCTTCTTTAAATTTGTGC  
CTGGACTGTTACCAACTTGACTGGTCCTGGGGCTCCAGTTCACCTCAAGTTC  
TTAACAATCAATTAATTTTTCTACAGAACTATCAGAGCAATCTTCCTTCCATCAA  
TCTCAACTTGTTCAAAAACTTTCAATAGTTTTATGTGACCTAAGAGTAGCTGC  
CTCCTCACCCCTTTCAGCTTGCCATTCAAGGCTGCATAATTTGTCCCAACCCCT  
TTCCGTCCTTCTTGACTCCTCTCACTGCTAACAGAGACAGAACTCATTACTTA  
CTTCTTTGACTGTACCCCTTGCTTCTCACGAGGGCTCTCCTTCCTAAATGATATG  
TCCATACAACTATTGTTGTTGTTCTTACTTTTAGCTCTTTTCTTAGCTCCACTTGT  
ACCCAGGTTTGATCACACCCCTACTCTCTGCCCCTGAAGCACCATTATTCTGT  
TATAGTCTCTTAATATCTATATCTATATTCATATATATGCATCCACAGATAATGTGT  
GGTATTGTCTTGAAAAATACATAAATGGTATACTTTGGTCTCCCTCTTATTAGT  
TTTTTCACTATCATTTAGTTTTTAAGATTTATCCCTTATTGGACATAAATAGCTAT  
AGTCTTTTTCACTACTGTGTTGCATTTTATAAATATGTACCATAATTATT  
CATTCATTCCCTAAGGGTGGGCATTTATGTTGTTTCTGCTGTTTCTGTTATTAC  
AAAAAGTTACAATAATATCCTTAGCTAGTTGGTCTCTTGTCTTATGGGCCAAA  
TTTTTACTGACCTTTCAAGATCCTGCTTTCATCCCAGCAGCTCCTCTGGGAAAA



TATAGTCACACCTCCATTTTTTTTCATTTCTTTAACATTGCATCTCAGATTCATTC  
CTTCTGAAATCTACCTTATTAGTTCAGGTCTGTAGGTTGTGCTGGACTATTTTCAT  
AACTCTTGACTGGTCCTGGGCTCCAGTTCACCTCTTACTCCAACAATCAATTTT  
CTACAGAACTATCAGAGCAATCTTCCTTTCCATCAATCTCAACTCTGTTCAAAA  
ACTTTCAATAGTTTATGTGACCCTAAGAGGTAGCTGCCTCCCCACCTTTCAGCT  
TGCCATTTCAAGGCTGCATAATTTGGTCCCAACCCCCTTCCGTCCTTGACTCC  
TCTCCTGCTAACAGAGACAGAACTCATTTTACTTACTCTTTTGACTGTACACCT  
TTGCTTTCCACGAGGGCTCTTTCCTGGAATGATATGTCCATACAACTGTGTGTT  
GTTGTTCTTGCCTGGCTCTTTCCTGGCCCACTTGTACCCAGGTTTGATCACCCC  
TACTCTCCTGCCCTGGGTAAGTCTATTAGTATAGATCTTAGCTATCACCATC  
TATATCTCTATATATAACCATCTTTAGATAATGTGTAGTATTGTCTTGAAAAAAT  
ATACATAAATGGTATACTTTGTCTCCCTCTCTGCGATTAGTTTTTTTTTCACTATCA  
TTTTAGTTTTAAGATTTATCCCTATTGACATAAATAGCTGGTCTTCCAATTACTGT  
GTTTTTCATTTTATAAATATACCATACATTGTTACATCCATTCCTCTAAGAGGTGG  
GCATTTATATTTATTTTCAAAGGTTTGTCTATTACAGTGTTACAACGAATATCCTTA  
GCTTAGCTGGTCTCCTTGTCTTGCCTAAATTTTACCCCCTGACCTTTCAGATC  
CTGCTTTCATCCCAGCTCCTCTGGGAAAGCCTTCCCTGAATCCCCCAGCCCAC  
AGCAGCAAAGTCTCTTGGTGCTGCTCAAGTTGCTTGTGCATCTTTGGTATCATC  
CCTGCCAAGCACACAGCTACATAAAGTGTTACTTAAAATATTAGCCGTTGACA  
AATGAATGAATGGGGCAGCACCCTCCGTGATGGCTCTATTCCTTTTGGCTTTG  
GCGCCTTGGCCCACTTTCCTTCTTTGACAGCACTGGTCCCTACTCCAGAGCATT  
CCTCTAGCTAGCAAAGCAGTGTGTGGATGTGTGTGGGTGTGGGTGGCGATATA  
CAGACCTCACTGGATGAGGTGCCTCTGCAAGTTCACGATCCAGCCCAAACCTCC  
AGTGCTTGAGTTCAGATTACACCCACCCCCTCACCTCCACGCCTTCTGCACTG  
GTCCAAGCCAGCGAGCCGCTGCAGCCTAGTCGAGTTAAGGCTGCTGGAGAAG  
AAGGATGCACGGACAGGGCCAGTGGCTCGTAGTAGTCCGCGCGGGAGCTCGG  
GCGGCACTTCTTCTGCAAGAAACCCTGGGTTGCCCAAGGCGGCGGGGCCGA  
GGCCACGCGGCAATGGGGCAGACTTGCAGGTGGGAGGAGGCGGCTGAGGCGG  
AAGGACACGAGGCTGCTGGCTGCACCCGAAAGTTTCAGCCAAACCGGGCGG  
CGGCTGGGCGGCGGCCGAAGACGAGCTCAGGGCGCGGGGAGTCGAGGCATG



CCTGCGCTGCGGACCGTAGCGCCAGGGCCCTGAGCCTTTGAAGCCGCAGGAG  
GAGGTGAGACGTCTCGGTTCCATCATGTGGATCTGCCCA **GGCGGGCGGGCGGC**  
**CGGGCGGGCGGGCGGCAGCGGGCGGCAGCGGGCGGGCGGGCAACGGCGCGGGCGGC**  
**GGCAGCGGGCGGGCGGGCGGCAGCGGGCGGGCGGGCGGGCGGGCGGGCGGGCGGGCGGC**  
**AGCGGGCGGGCGGGCGGGCGGGCGGGCGGCAGCGGCAGCAACGACGGCAACGGC**  
**AGCAGCAGCAGCAGCGGCAGCAGCGGGCGGCAGCAGCGGGCAACGGCGATGGC**  
**TGCAACGGCAGCAGCGGGCGGGCGGGCGGGCGGC**

**F5-II:4-read 1**

GAAGACAGGAGGGACTGGTCTGTTAGAGGAGGAATTTATTGTGGTGTCCGCA  
AAGCCTTCTTTGACTGAAGGATGAATTATGATTGTAGTTCATTAAGAGGAGGA  
GGGAAGGGGACTACAGGAGTCAATCCAAGCCAAAGGAACAAAAGTATTACAG  
GAGAAACAGCAAGATATGTTTGGGGAACTTGCCAGCCAATACTGTTATTGTG  
TGAAGTCTGGCTACCAGGCAGGAGGACACAGAGATGTAGTCTAATGACTTAA  
AAGCAAGGCCTTGTATAAAAATTCCATGTTTAGAAGTTTGAATTTTATCCATA  
GGAGCTGTGAGAGGTTCTATGGGTAGGATTTCCCATCCCAACAACAGGATTGT  
AACTCCACATCCAAGAATTAGTCACACCCCCATTTTTTTTTTTTCTTGCTTTT  
AACATTGTCTCAGATTCATTCCTTCTGAAATCTACCTTATTAGTTCAGGCTCAAT  
TTGTGCCTGGACTGTTCACTCAACTCTTGACTGGTCCTAACGCAGTTCACCTCT  
TTGCTCCCAACAATCAATTTTCTACAGAACTATCAGAGCAATCTTCCTTTCCAT  
CAATCTCAACTCTGTCTGGGCAACTTTCAATAGTTTTATGTGACCAAGAGGTG  
AAGCGTTTCACCCTTTCAGCTTAAGCATTCAATGCTGCATAATTTGTCCCAAC  
CCTTCTCGTCCTTGACTCTCATTGCTAACAGAGACAGAACTCATTATTTACTC  
TTGATTGTACCTTTGTTTACGAGGGCTCTTCCCTGAATGATATGTCCACAAC  
TTGTTGTTGTTCTTACTTTTAGCTCTTAGCCCACTTGTACCCAGGTTTGATCACA  
CCCCCACTCTCCTGCCCTGGAAGTAACTACTATTCTGGTTATAGTCTTCAATAT  
CTATATCTATATCTATATATATGCATCCACAGATAATGTGTAGTATTGTCTTGAAA  
AACATAAATGGTATACTTTGTCTTCATGTATTAGTTTTTTTTTCACTATCATTTAGT  
TTTTAAGATTTTATCCCTATTGACATAAATAGCGGGCTCTTTTCATAATTACTGTG  
TTGCATTTCAATTTATAAACATAACCACATTATCTATCCATTCTCTAAGGGTGGCAT  
TTATGTTGTTTTCTGGCTGTTTTGCTATTACAGGTGTTAGCAAACGAATATCCAG

TTTAGCTGGTCTCCTTTGTTTCATGCCAAATTTTACTAATCTTTCAAGATCCTGCC  
ATCCCAGCCTCTGGGAAAGCCTTCCCTGAATCCCAGCCCAGCGCAAAGTCTTG  
GTACTCAGTTGCTGGCAGTGCATCTTTTGGTATCATCCCATTGCTACACAGCG  
CACACAAAAGTAAGGCACTTAAAGAAACCACGGATGAACAAATGAAGAATGA  
ATGGAAGCAGCACAACGGGTGATGGCTCTTATTCCTTTTAATGGACTTTGGCG  
CTCTTGGCCCAATTCCTTCTTTTGACAGCACTGGTCCTACTCCAGAGCACATT  
CTCTAGCTAGCAAAGCAGTGTGTGGATGTGTGTAGGTGGCGATACAGACCTCA  
CTGATGAGATCTGCCTCTCCCTGCAAGTCTACGATCCAACCCAGTGCCAGTTC  
AGAGTCCCACCCACCCCCACCCACGCTCCCTTCTGCACTGGTCGCTTTCAGCG  
AGGGGGCGCAGCCCCTGATCGAGTTAAGGCTGCTGGAGAAGGATGCGGACGG  
GGCCAGGACTGTAGTAGATCCTCCGCGTGC GGAGCTCGGGCCGGCGCTTTTTC  
CTGCGGGAAACCCCTGGTGCCCAAGGCGGAAGCTGAGCGCCGCGGCGACAG  
GGCGGGGCTTGCGGTGGAGGAGGCGGCTGAGGCGGAAGGACACACGAGGCT  
GCTTCGCTGCACAATTCCGAGAAAAGTTTCAGCCAAACTTCGGGCGGCGGCC  
GAGAGGCGGCGGCCGAGGAGCGGCGGACTCTGGGGCGCGGGGGAGTCGAGG  
CATTTAGGTGCCTGTAAGCTTGACCGTAGCGCCAGCCTGAGCTTTGAAGCAGG  
AGGAGAGTGGGGCCTCTACTGGGACCCCATGTGGATCTGCCCA **GGCGGTGG**  
**TGGTGGTGGTGGTGGGTGGGTGGTGGTGGTGGTGGTGGTGGTGGTGGTGGTGGT**  
**GGTGGTGGTGGTGGGTGGTGGTGGTGGTGGTGGTGGTGGTGGTGGTGGTGGT**  
**GGTGGTGGTGGTGGGTGGTGGTGGTGGTGGTGGTGGTGGTGGTGGTGGTGGT**  
**GGTGGTGGGGTGGTGGCGGCGGTGGTGGTGTGGCGGTGGCGGTGGCGGCGGT**  
**GGCGGTGGCGGCGGCGGTGGCGGTGGCGGCGGGTGGCGGCGGCGGCGGGCG**  
**GCGGCGGCGGCGGCGGCGGCGGCGGCGGCGGCGGCGGCGGCGGCGGCGGCGGT**

**F5-II:4-read 2**

GGATGGTAGATGGGGGCCCAATGACTTAAAAGGCCTTTGTATGTACTATGTTTA  
GAAGTTTGAATTTTATCCTATAGAGTCAGAGAGTTCTATGGGTAGGATTTCCCA  
TCCCAACAACAGGATTGTAAACCCACATCCAATTAGTCACACCTCCATTTTTT  
TTTTCTGTTTCTTAAACATTGTCTCAGATTCATTCCTTCTGAAATCTACCTATTA  
G TTCAGGTCTTCTTAAATTTGTGCCTGGACTGTTACCAACTCTTTGACTGGTC  
CTGGGGCTCCAGTTCACCTTGCTCCCAACAATCAATTTTCTACAGAACTATCAG

AGCAATCTTCCTTTCCATCAATCTCAACTCTGTTCAAAAACCTTTCAATAGTTTT  
ATGCACCAAGAGGTAGCTGCCTCCCCACCCCTTCAGCTTGGCTATCTCAAGG  
CTGCATAATTTGTCCCAACTCCCCTTCCGGCCCTGACTCCTCTCACTGCTAACA  
GAGACAGAACTCATTACTTACTTCTTTTGACTGTACCTTTGCTTTCACGTAGG  
GCTCTTTCCTGGAATGATATGTCCATACTAATTGTTGTTGTTCTTACTTTTAG  
CTCTCTTTCTTAGCCCACTTGTACCCAGGTTTGATCACACCCCCTACTCTCCTG  
CCCTGGAAGTAACTACTATTCTGGTTATAGTCTCTTTAATATCTATATCTATATCT  
ATATATATGCATCCACAGATAATGTGTAGTATTGTTCAAAAAAACATACTACAA  
ATGGTATACTTTTGTCTCCTCTTATGCATTAGTTTCTTCACTATCATTAGTTTTAA  
GATTTATCCCTATTGGAGTACAACAGCTATAGTCTTTTCAATTACTGTGTTGCAT  
TTCATTTTATAAATATATCTATACATTATTCATCCATTCCTCTAAGGGTGGGCATTT  
ATGTTGTTTTCAAGGTTTTGCTATTACAGTGTGTTACAACATAATCCTTAGCTT  
AGCTGGTCTCCTTGTCTTATACAAATTTTACTGACCTTTCAAGATCCTGGCTTAT  
CCCAGCTCCTCTGGGAAAGCTCTCTTCCCTGAACTTCAGCCTAAGCGGTAAAG  
TCTTTGGTACTCAAAGTTGCTTTTGTGCATCTTGCATCATCCCACTGCTACACAC  
AGCTACGCAGCAAGGCACTTAAGAAATATTCGCTACACGGGATGAACAAATGA  
ATGAATGAATGGGGCAGCACCACCTGTGATGGCTTCTATTCTTTAATGGACT  
TTTGGCGCCTTGGCCATTTTCTCTTTGACAGCACTGTCCTACTCCAGAGCAT  
TCCTCTAGCTAGCAAAGCAGTGTGTGGATGTGTGGGTGTAGGTGGCGATACAG  
ACTCATCCTCGGATGAGGACCGCCTCTCCCTGCAAGCTCACGATCCCGCAAAC  
TCCAGTGCTTGAAGTTCAGAGAGTCCACTCCCCACCCCTCACCTCCACGCCC  
TTCTGCACTGGCTGCTTGTGTGAGCCGCTGCAGCCCTGATCGAGTTAAGGCT  
GCTGGAGAAGGATGTGATCAGCCAGTGACTIONGCTAGTAGATCCCTCCGCGCGGA  
GCTCGCCGCGCCTTCTTCTGCGGGAAACCCTGTGCCCAAGGCGAGGAAGGA  
GGCCGCGGCGACAGGGGCGGGGCTTGCAGGTGGAGGAGTAAGGCTGAGGCGG  
AAGGACACACGAGGTTGCTTCTGCTGCACCTGAGAAAGTTTCGCGCCAACT  
TCGGGCGGCGGTTGAGGCGGCGGCCGAGGAGCGGCGGACTGGGGCGCGGGG  
GAGTTGAGGCATTGCGCCTGTGCTTCGACCAAAGTGCCAGGGCCTGAGCTTTG  
AAGCAGGAGGGAGGGGAGGAGAGAGAGGTTTCTCTATTGGACCCTCCCATGT  
GGATTCGGGTTTGTGTGGCGGTGGCGGTGGCGGTGGTGGCGGGTGGTGGCGG



GTGGGCATTTTATGTTGTTTTTCAGGGTTTTGCTATTACAGTGTTACAACCTTGAAT  
ATCCTTAGCTTAGCTGGTCTCCTTGTCTTATACAAATTTTACTGACCTTTTCAA  
GATCCTGCTTTTTCATCCAGCTCCTCTGGGAAGCCCTTCCCTAGATCCCTGACCC  
ACAGCTGACAGTACTCAAAGTTGGCACGGCATCTTTGGTATCATCCTGCCAAG  
CACACAGCCTACTACGCAAAGTAGGGCGCAGAAATATTCCTTCACGGATGAACA  
AATGAAGAAATGAATGAATGGGGCAGCACCCCTTCCGTGATGGCTCTATTCTTT  
TTAATGGACTTTGGCGCCTTGGCCACTTTCCTTCTTGACAACCTGGTCTGCTC  
AGAGCATTCCTCTAGCTAACAAAGCGGTGTGTGGATGTGTGGGTGTAGGTGGC  
GATACAGACCTCACTGGATGAACCGCCTTACTCTCCCTGCAGTTCGATCGGCA  
GAGCTCCATTGCGCGGGGACCAGAATTCTACTTGCCCCCTACTCCACCCTTCT  
GCACTGGTCAAGCCAGCGAGCCCCTGCAGCCACAGTAGTTGAGGCTGCTG  
GGAGAAGGATGCGGACAGGGGTTGATGACTCGTGGTAGATCCCTCCGCGCGC  
GGAGCTCGGGCAGCGCTTCTTCTGGGAAGCCCCTAGGTGCCCAAAGCGGCGG  
GGCCGAGGCCGCGGCATTTCAATCAGGGCAGGGCTTTGCGGTGGGAGGGAGG  
CGGCTGAGCGGAAGGACACACAGGGCTGCTTCGCTGCACACCGGTTCAAAGC  
CAGAGCTTCAGGCGGCAGCTGAGGCGGCAGCCAGGGGCGTGACTCCAGGGC  
GCAGGAGTCGGGCATTGCGCCTGTGCTTCGGACCGTAGCGCCAGGGCTAGGC  
CTTTGAAGGCAGGAGGAGGAGAATTAGGGCTCCTATCGGGACCCCCCTCCCAT  
GGATCTGCCCA**GGCGGCGGGCGGGCGGGCGGGCAGCGGCAGCAGCAGCAGCA**  
**GCGGCGGGCGGCACGGCAGCAACAGCAGCAACGGCTTGGCGAAGCGGCGGGC**  
**GCAGCGGCGGGCGGGCGGGCGGGCGGGCGGGCGGGCGGACGGCAACAACGGCA**  
**GCAGCAGCAGCGGCGGGCGGGCGGGCGGGCGGGCAGCAGCGGCGGCAGCAGCA**  
**ACGGCTGGCAACGGCAACAGCAGCAGCAGCAGCAGCGGCAGCGGGCGGGCAGC**  
**GGCGGGCGGCAGCGGCAGCAGCGGCAGCGGCAGCGGGCGGCAGCGGGCGGCAGC**  
**GGCAACGGCGGCAGCTGGCAGCGGGCGGCAGCGGGCGGCAGAGGAAGGCGGC**

**F9-II:6-read 2**

GGCCTTTGTA CTATGTTTAAAGTTTGAATTTATCCTATGAGTCAGGGAGGTTCTAT  
GGGTAGGATTCCCATCCCAACAGGATTGTAAGCTCCCACATCAATTAGTCACAC  
CTCCATTTTTTTTCTGTTTCTTTAACATTGTCTCAAGGTTGTTCTTCTAATCTAC  
CTTATTAGTTCAGGTCTTCTTAAATTTGTGCCTGGACTGTTACCAACCTCTTG

ACGGTCCTGGGAGCCAGTTTCACCTCTTGCTCCCAACAATCCAATTTTCTACA  
GAACTATCAGAGCAATCTTCTTTCCATCAATCTCAACTCTGTTCAAACTTTCA  
ATAGTTTATATGACCCTAAGAGGTAGCTGCCTCCCCACCCCTTTCAGCTTGCCA  
TTCAGGCTGCATGTAATTTGGTCCCAACCCCTTTCGTCCTTGACTCCTCTCA  
CTGCTAACCAGAGACAAGAACTCATTGCCTCTTTTGACTGTACCTTTGCTGCTT  
TCTGAGGCTCTTTCCTGGAATGATATGTCACGCTGTGTTGTTGTTCACTGGCTC  
TTTTACTTAGCCACTTGCCCAGGTTTGATCACACCCCTACTCTCTCCTGCCCT  
GGAAGTAACTACTATTCTAGTTTCAGTCTCTTAATATCTATATCTATGTCTATATAT  
ATGCATCTACAGATAATGTGTAGTATTGTCTTAGAAAAAATATACATAAATGGT  
ATACTGTCTCCTGCGATTAGTTTTTTTCACTGTATTTGTAGTTTTTAGATTTATCC  
CTGACATAATGTGCAAATTACTTTTTCCATTACTGTTGCATTTCATTTTATAAATA  
TACCATACATTATTCATCCATTCTACTCTAAGGGTGGGCATTTATGTTGTTTTCA  
GGTTTTATTACAGTGTTATGAATATCCTTAGCTTAAGCTGGTCTCCTTGTCTTATA  
CAAATTTTACTGACCTTTCAGATCCTGCTTCATCCAGCTCCTCTGGGGCTTCCC  
TAAATCCCCAAACACAGCAGCAAAGTCTTGGTACTCAAAGTTGCTTGCATCTT  
TGGTATCATCCACTGCAAGCACACA ACTCACATAAAGTAAGGCACTTAAATATT  
ATACGGATGAACAAATGAATGAATGAATGGGCAGCACCCTCCGTGATGACCA  
TTGCTTTAATGGACTGGCGCCTTGGCCACTTCCCCTTGCGACTGGCAGCAC  
TGGTCCTACTCCAGAGCAGCCCTCTAGCTAGCAAAGCAGTGTGTGGATGTGTG  
GGTGTAGGTGGCGATACAGACCTCACTGGATGAGGACCCACTTACTCTCCCTG  
CAAGTTCGATCAGCAGCAGAGAGCTCAGTGCTTGAAGTTCAGGTGCACCCCT  
GCCTCCACGCCCTTCTGCACTGGTCAAGCCAGCAAACCGCTGCAGCCCTGAT  
CGAGAGTTAAGGCTGCTGGAGAAGGATGCGGACAGGGCCAGTGA CTGACTCAGTAG  
TGAATCCCTCCGCGCCAGACTCGGGCCGGCACTTCTTCCTGCAGGGAAACCC  
TGGGTGCCCAAGGCAGGCAGGGGCCAGGCCGCGGCGACAGTGGGGCGGGA  
GCTTGCAGTGGGAGGGAGGCGGCTGAGGCCCGGAAGGACCACAGGCTGCTT  
CGCTGCACACCCGAGAAAGTTTCAACCAA ACTTCGGGCGGCTGGGCGGCGGC  
CGAGGAGCGGCGCTTTCAGACTGGGGGCACGCAGGGGAGTCAAGGCATTGC  
GCCTATGCCTTCGGACCGTAAGCGCCAGGCCTGAGCCTTGAAGCAGGGAGG  
AGGGAGGAGAGTGGGGCTCCTCTATCAGGACCCCTCCCATGTGGATCTGCCCA







GGTTTTCATTAACAGGATTGTAAACTCCCACATCCAATTAAATTACACCTCCATT  
TTTCTGTTTCTTTAAGCAACCTTCTCAGATTCATTCCTTCAAATCTATGTTGATA  
GTTCAAGTCTTCTTAAATTTGTACAGATGTTCTGGCTCCCAGCTAGTCCTGGGC  
TCAGTTGCCCTCTTGCTCCCAACAGTGAATTTTCTACAGACTTCTCAGAGCA  
ATCTTCTTTTATCAAATATCAACTCTGTTCAAAAACCTTTTAATTAGTTTATTCTTG  
TTGTTCAAGGGTAGCTGCCTCACCTTTGTGCCATTCAGGCTGTAATTTGGTCC  
CCAACCCCTTTCAAGTCCTTGGCTCCTACCATACTAACAGAGACAGAACTCAT  
TGCTTCTTTTGACTGTACCTTTGCTTTCACAGGGCTCTTTCCTGAGATAATTATC  
CATAAGCTATTGTTGTTGTTCTTACTTTAGCTCTTTTCTTGCACTTGCAGTTTGA  
TCACCCCTACTCTCACACCCCTGGGAAGTAACTTTTCTTCTAATTTATAGTCTC  
TACCATGTCTATCCTCATATATATATGCATCCCACAGATAATGTGTAGTATTGTCT  
TGAAAAAATATACATAAATGGTATACTTCTTCTCCCTCTACGATTAGTTTTTCC  
TATCATTTAGTTTTAGATTTATCCTATTGACATAAATGCTTTCTAGTCTTTTCAAT  
TTTATTGCATTCATTTTATAAATACTACCATTATTCATCCATTCCTTAAGGGTGAG  
CATTTATGTTATTTTCAGGGTTTACTATTACAGTGTTGATGAATATCCCTTAAGCA  
GCTGTCTCTAACCTCATATACAAATTTTACCCAGCCTTTCAAGATCCTGCTTTC  
TGTGCCCAGCTCCTCTGAGAAGCCTTTACTGGTCCCAGCCCACAGCAGCAAGT  
CTTGGTACTCTACAGTTGTGTCTTTGGTGCTCGTCACTGTAAACACCACAGCTA  
TAAAGTAAGGCATGAAATATTCATGGATGAACAATGAATGAATAGACCAGCTTC  
CTTCCGTAATTAGCTCTATTCCTTTTTAATGGACTTTGGCCACTTTTCTTCTTG  
ACAGCATAATTACCTCCAGGCATTCCTCTAGCTATGCCGTGATGCCGGATGTGT  
GGGTGGGTGGCGATACAGACCTCACTGGATGAGGGACCGCCTCTCCCCTGCA  
GTTACAGATCCCAGCGAAGCTCAGGTGCTTGAAGTTCAGGTCCCTACCCCCC  
CTGCCTCCACGCCCTTCTGCATAGTGAGCCAGCGAGCCGCTGCAGCCCTGATC  
GAGTTAAGGCTGCTGGAAGGATGCGGACAGGGCAATGATGACTCGTGGTAAG  
ATCCCTCGCGCGGGCCTCGGGCCAGCGCTTCTTCTGCGGGAAACCCCTGGGTG  
CCCAGGCGCAGCAGGGCCGGGCCGCGGCGACAGTAAAGACAGAGGCCCTGC  
GGTGGGAGGGAGGCGGCTGGGCGAGAGGACACACGAGGGCTGCGCTGCACC  
AGAAAGTTTCGTATTAACCTTCAGGCGGCGGCTGAGGCGGCAGCCGAGGCCA  
CAACAGACTCAGGAGCGCAGGAGTCAGGGCATTGCGCCTGTGGCTGGACCAT



TGGTATGCTTTGTCTCCCTCTACGATTAGTTTTTCACTGTCATTTAGTTTTTAGAT  
TTATCCCTATTGACATAAATAGCTATAGTCTTTTCAATTACTGTGTTGCATTTTCAT  
TTAACAATATAACCATAACATTATTCATCCATTCTCTAAGATTTGGGCATTTATG  
TTGTTTTACAGTTTTGCTATTACAGTGTTACCTTGAATATCCTTGGCTTAGCTGG  
TCTCTTCTTGTCTTATACAAATTTTTACTGACCTTTCAAGATCCTGCTTTCATCC  
AGCTCCTCTGGGAAAGCCTTCCTGAATCCCCCAGCCCACAGGCGGCAAAGT  
CTTGGTACTCAAGTTTAGCAGCCATCTTTAAGGTATCATCCACTGCCAAACAC  
ACAACTCATAAGCCAGGCACTTAAGAAATATTCCTTTGCGGATGAACAAATGA  
ATGAATGAATGGGGCGCAGCACCCTCCGTGATGGCTCTGTTCTTTTTAATGGA  
CTTTGGCGCCATGGCCACTTTCCTTCTTGACAGCACTGGTCCCTGCTTAGAGC  
ATTCCTCTAGCTAACAAAGCAGTGTGTGGATGTGTGGGTGTGGGTGGCGATAC  
AGACCTCACTGGATGAGGACCGCCTCTCCCTGCAAGTTCACAGTCGGCAAAC  
TCCAGTGCTTGAAGTTCAGTCTACCCACCCCCCTCACCTCACGCCCCACTGC  
ACTGGTCAAGCCAGCAGGCCGCTACAGCCTGATCAGGTTAAGGCTGCTGGAG  
AGAAGGATGCGGACGGGAGCCAGTGACTCGTAGTGAATCCCCTCCGCGCGGA  
GCTGGCCGGCGCTTCTTCCTGCGGGAAACCCCTGGGTGCCCAAGGCGGGGCC  
AGGCGGCGCGACAGTGGGGCAGGGCTTGCGGTGGGAGGGAGGCGGCTGAGG  
CGGAAGGACACACGAGGGCTGCTTCGCTGCACGCGAAAGTTTCAGCCAAACT  
TCGGGCGGCAGCTGGAGCGGCAGCCGAGGCAACAGACTCAGGGCGCAGGGA  
GTCGAGCATTTTACTTTTATGCTTCGGACCGTAGCGCCAGGGCCTGAGCGCAC  
TGAAGCAGGAGGAGGAGGTGGGGCTCCTCTATCCGGACCCCTCCCATGTGGAT  
CTGCCA **GGCGGCGGCGGCGGCGGCAGCAGCGGCGGCAGCGGCGGCGGCAG**  
**CGGCGGCGGCGGCGGCGGCGGCAGCAACGGCAACGGCAGCAGCAGCAG**  
**CGGCGGCGGCGGCGGCGGCGGCGGCGGCGGCGGCGGCGGCGGCGGCGGCG**  
**GCGGCGGCGGCAGCGGCGGCGGCAGCAGCTGACTACGGCAACGGCAGCGGC**  
**GGCGGCAGCGGCGGCGGCGGCGGCGGCGGCGGCGGCGGCGGCGGCGGCGG**  
**GGCGGCGGCGGCGGCGGCGGCGGCGGCGGCGGCGGCGGCGGCGGCGGCGGCGG**  
**AGCAGCGGCAACGGCGGCGGCGGCGGCGGCGGCGGCGGCGGCGGCGGAGGA**  
**GGCGGC**

**F9-II:6-read 6**

GGGGTCATTTCTGAAGCCAAAGGAACAAAAGATACAGGGACAGAAACAGCAA  
GATATGTTTGAGGTCTCAAGTTGGCCATCACTGTTGTTGGCCTTGAGAAGTTCT  
ACAACAGGGGCAGGGAGGACAGAGATGGGGCCCAATGACGAAAAAGAGCCT  
TGTATGTACCATGTTTAAAATTTTATCCGAGTCAGGGAGTTTATGGTGGGTTTAT  
CCCAACAGAGTTATATTATGACTCCCATCCATTAGTCACACCTCCATTTTTTTTC  
TGTTTCTTTTAAACATTGTCTCAGATTCATTCCTTCAGGAAATCTACCTTATTCGT  
TTCAGGAGTCTTCTAGCAAGTTGTGCCTGGACTGTTACCCAGCCTCTTGTTG  
ACTGGTCCTGGGGCTCCAGTTCACCTCTTGCTCCCAACAATCAATTTTTCTACA  
GAACTATCAGAGCAATCTTCCTTTCCATCAATCTCAACTCTGTTTAAAAAACTT  
TCAATATTTTATCATGACCTAAGTAGCTGCCTCCCCACCCTTTCAGCTTGCCATT  
CAGAGGCTGCATAATTTGGTCCAGCACCGTCCTTGACTCCTCTCACTGCTAAC  
AGAGACAGAACTCATTACCTGCTGACTGCCTTTACTTTCTGGGCTGCTGGA  
ATGATAGCATCCATACTAATGTTGTTGTTCTTACTTTTAGCTCTTTTCTTAGC  
CCACTTGTACCCCGGTTTGATCACCCCTACTCTCTGCCTGGGAAGTAACTACTA  
TTCTGTTATAGTCTTAATATCTATATATATATATATCTATATATATGCATCCACAGAT  
AATGTGTAGTATTATCTTGAAAAATATACATAAATGGTATACTTTGTCTCCCTCTC  
GATTAGTTTTTCACTATCATTAGTTTTTAAGATTTATCTATTGACATAAATAGCT  
ATGGTCTTTTCAATTACTGTGTTGCATTTCAATTTATAAATATAACCATACATTGTTA  
CTAAATCCATTCTCTAAGGGTGAGCATTATGTTTTCAAGGTTTTTATTACACA  
GTGTTACTTGAATATCATATATGCTCACTTGTCTTATACAAATTTGCTGACCTTTC  
AAGATCCTCACTTTCATCCCAGCTCCTCTGGGAAAGCCTTCCCTGAATCCCAG  
CCCACAGCGGCAAAGTCTTGGCCTCAAGTTGCTTGTGCCATCTTGGTATCATCC  
CACTGCACCAAGCACACA ACTACATAAAGTAAGGCACTTAAAATATTAAGCTA  
CACGGATGAACAAATGAATGATGAATGAATAGGGCAGCACCACTTGTGATGGC  
TATTCCTTTTTGAACTTTGGCGCCTTAGCCCCACTTTCTGCTTCTTTGACAGCA  
CTGAATCCTACTCCAGAGCATTCTCTCTTGTAAAACAGTGTGTGAGTGTG  
GCGGGTGTGGTGGCGATACAGACCTCACTGGATGAGGACCGCCTCTCTCCCTG  
CAAGTTCGGTGACAACTCCAGTGCTTGAAGTTCAGAGTCCTACCCACCCCT  
CACCTCCACGCCCTTACCAGGTCAAGCCAGCGAGCCGCCTGCAGCCCTGA  
TCCCAGGTTAGTACTGGAGAAGGATGCGGACAGCCTCCTGCAGGAAGCCTGG

GTGCCAAGGCAGCGAACCCGGGCCGCGAGCAGTGGGGCAGGGCTTGCAGTG  
GGAGGAGGCGGCTGAGGCAGGAAGGACACGGCTGCTTCGCTGCACACCCGA  
AAGTTCAATGCAGCTTCGGGCGGCGGCGCTGGGCGCGGCCGAGGCAGCAGAC  
TCAGGGCGCAGAGAGTCAAGGCGTTGCGCCTGTACTTCGGACCGTAGCGCGG  
TTCAGGCGCTGGCAGGAGGGAGGGAGAGAGTGAATCCTCTATCAGGACCCCC  
CCTCCCCATGTGGATCTGCCA **GGCGGGCGGCGGCACGGCGGCGGCAGCGGGCGG**  
**CAGCGGCGGCGGCGGCAGCAGCAGCAGCGGCGGCGGCGGCGGCGGCGGCGG**  
**CGGCGGCGGCGGCGGCAGCTGGCGGCAACGGCGCGGCGCAGCAACGGCGGC**  
**AGCAGCGGCGGCGGCGGCGGCGGCGGCGGCGGCAACGGCAGCGGCGGCAGCGGC**  
**GGCAGCAGCGGCGGCACGGCAACGGCGGCAACGGCGGCGGCGGCGGCGGCG**  
**CGGCGCGGCGCAACGGCGGCAACGGCAGCGGCAGCAGCGGCAGCGGCGGCG**  
**GCGACGCGGCGAAGCGGCGGCGGCGGCGGCGGCGGCGGCGGCGGCGGCGG**  
**GGCGGCGGCGGCGGCGGCGGCGGCGGCGGCGGTAACGGCAGAGGAGCCGGC**

**F9-II:6-read 7**

GCCAAAGGAACAAGATACAGGGACAGAAAACAGATATGTTTGGGGGAATTCC  
CTGGTTAGCCAATACTGTTATTGTGAAGTTCACAACAGGGGCAGGGAGGATAA  
GAGATAGCTCAATGACTAAAAAGGCCTTGTATGTACCATGTTTAGAAGTTTGAA  
TTTATCCTATAGGAGTCAGGGAAGAGGTTCTATGGGTAGGATTCATCCCAACA  
GGATTGTAAACCCCCACATCCAATTAGTCACACCTCCATTTTTTTTTTTCTGTTT  
CTAACATTGTCTCAGATTCATTCCTTCGAAATCTACCTTTATTAGTTCAGGTCT  
TAAATTTGTGCCTGACTGTTACCAACTCTGGATTGGTCCTGGGGCTCCAGTTC  
ACCCTTGCTCCCCAACAATCAATTTTCTACAGAACTATCAGAGCAATCTTCCTT  
CCATCAACAATCTCAACTCTGTCTGCAAAAATCTCAATAGTTTTATGTGACCT  
AAAGAGGTATTGCCTCTAATCTTTCAGCTTGCCATCTGTTGCATACAATTTGTCC  
CAACTCTTCGGCCCTTGACTCCTCTCACTGCTAACAGAGACAGAACTCATT  
ACTTACTCTTTGACTGTACCTTGCTTTCACGAGGGCTCTTCCTGGAATGATATG  
TCCATACAACTATTGTTGTTGTTCTTACTTTTTAGCTCTTTTCTTAGCCCACTTGT  
ACCCAGGTTTGATCACACCCTACCTCCTGCCCTGGAAGTAACTACTATTCTGG  
TTATAGTCTCTAATATCTATATCTATATCTATATATATATCCACAGATAATGTGTAGT  
ATTGTTCTTGAAAAATATACATAAATGGTATACTTGTCTCTGCGATTAGTTTTCA

CTATCATTAGTTTTTAAGATTGTCCTATTGACATAAATAGTTATAGTCTTTTTCAA  
TTATTGTGCCAGACATTTTCATATTTATAAATATACCATACATTATTCATCCATTCT  
CTAAGGGTGGGCATTTGTGTTGCTTTCAAGGTTTGCTATTACAGTGTTACAAC  
AATATCCTTAGCTTAGCTGGTCTCCTTGTCTTATACAAATTTTATTGACCTTTCA  
AGATCCTGCTTTATCCCAGCTCCTGGGAAAGCTCTTCCTGAATCCCCAGCCCA  
CAGCGGTAAAGTCTGGTACTCAAAGTTGCTTTGCATCTTTTGGTATCATCCCAC  
TGCCAAGCACACAGCTACGCAAAGTAAGGCACTTAAGAAATATTCGCTACACG  
ATGAACAAATGAATGAATGAATGGGGCAAAAAGCACCCACCTGTGATGCCTTAT  
CTCCTTTTAATGGACTTGGCGTGCCTTGGCCCACTTTTCCTTCTTTTGAATAGC  
ACTGGTCCTACTCAGGAGCATTCTCTAGCTAGCAAAGCAGTGTGTGATGTGG  
GTGTAGGTGGTGACACAGATCTCACTGGATGAGACCGCCTCCCTGCAAGTTCA  
CGATCCTGGCAACCCAGTGCTTGAAGTTCAGGGAGTCCTACCCACCCCTCAC  
CTCCACGCCCTTCTGCACTGGTCAAGCCAGCGGGAGCTGCAGCCCTGATCGA  
GTTAAGGCTGCTGGAGAAGCATGCGGACGGGCCAGTGGACTGTAGTAGATCC  
CTCCGCGCGGGAGCCTGGGCCGCGCTTCTTCCTGCGGGAAACCCCTGGTGC  
CTGCAAGGCGGTGGGGGAAGGGGAGGCCGCGGCGACAGTGGGGCGGGGCTT  
GCGGTGGGAGTGAGGCGGCTGAGGAAGGACACACGAGGTTGCTTGCTGCAC  
ACCTGAGAAAGTTTCAGCTAAACTTCGGGCGGCATGAGGCGGCGGCCGAGGA  
GCGGCGGACTCTGGGCGCGTGGGGAGTCGAGGCATTTGCGCCTGTGCTGACC  
AGCGCTAGGGCCTGTTTTGAAGCAGGAGGAGGGAGGAGAGAGTGGGGTTTTA  
TCGGGACTCCCCTGGCGATTTACCA **GGCGGTAAGGGTGGTGGTGGCGGTGGT**  
**GGCGGTGGCGGTGGTGGTGGTGGCGGTGGTGGCGGTGGTGGTGGCGGTGGCG**  
**GTGGTGGCGGTGGCGGGTGGGTGGTGGCGGCGGGTGGCGGTGGTGGTGGT**  
**GTGGTGGCGGTGGTGGTGGCGGCGGGTGGTGGCGGCGGTGGCGGTGGTGGT**  
**GTGGCGGCGGCGGCGGTGGTGGCGGGTGGCGGCGGCGGCGGCGGCGGCGGG**  
**TGGTGGCGGCGGCGGCGGTGGCGGCGGTGGCGGCGGCGGCGGCGGCGGTGGCG**  
**GTGGCGGCGGCGGTGGCGGCGGCGGCGGCGGCGGCGGCGGCGGCGGCGGAG**  
**GAGGCGGC**

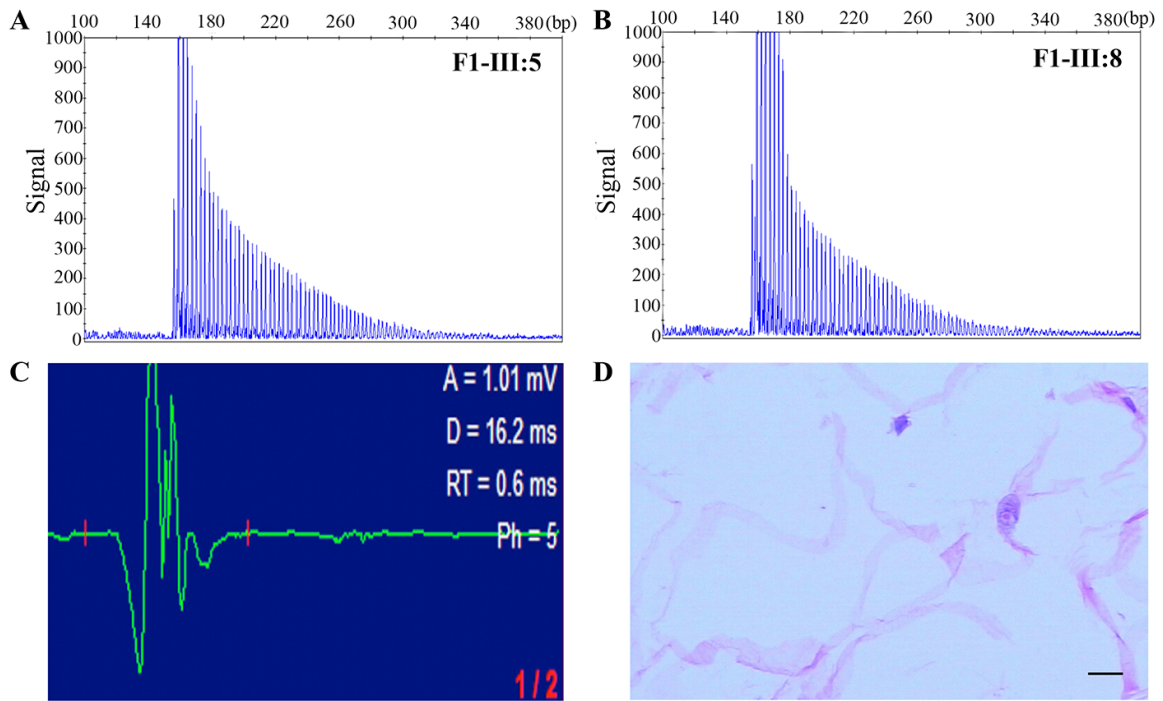

**Figure S2. Additional Molecular and Clinical Diagnosis of Family 1.** (A-B) RP-PCR assay and GC-PCR assay showed abnormal repeat expansion in subject F1-III:5 (A) and F1-III:8 (B). (C) Representative motor unit potential (MUP) of right tibialis anterior from electromyogram of subject F1-III:8 indicated neurogenic impairment. (D) Skin biopsy sample of subject F1-III:8 displayed typical eosinophilic intranuclear inclusions. Scale bars, 10 $\mu$ m.

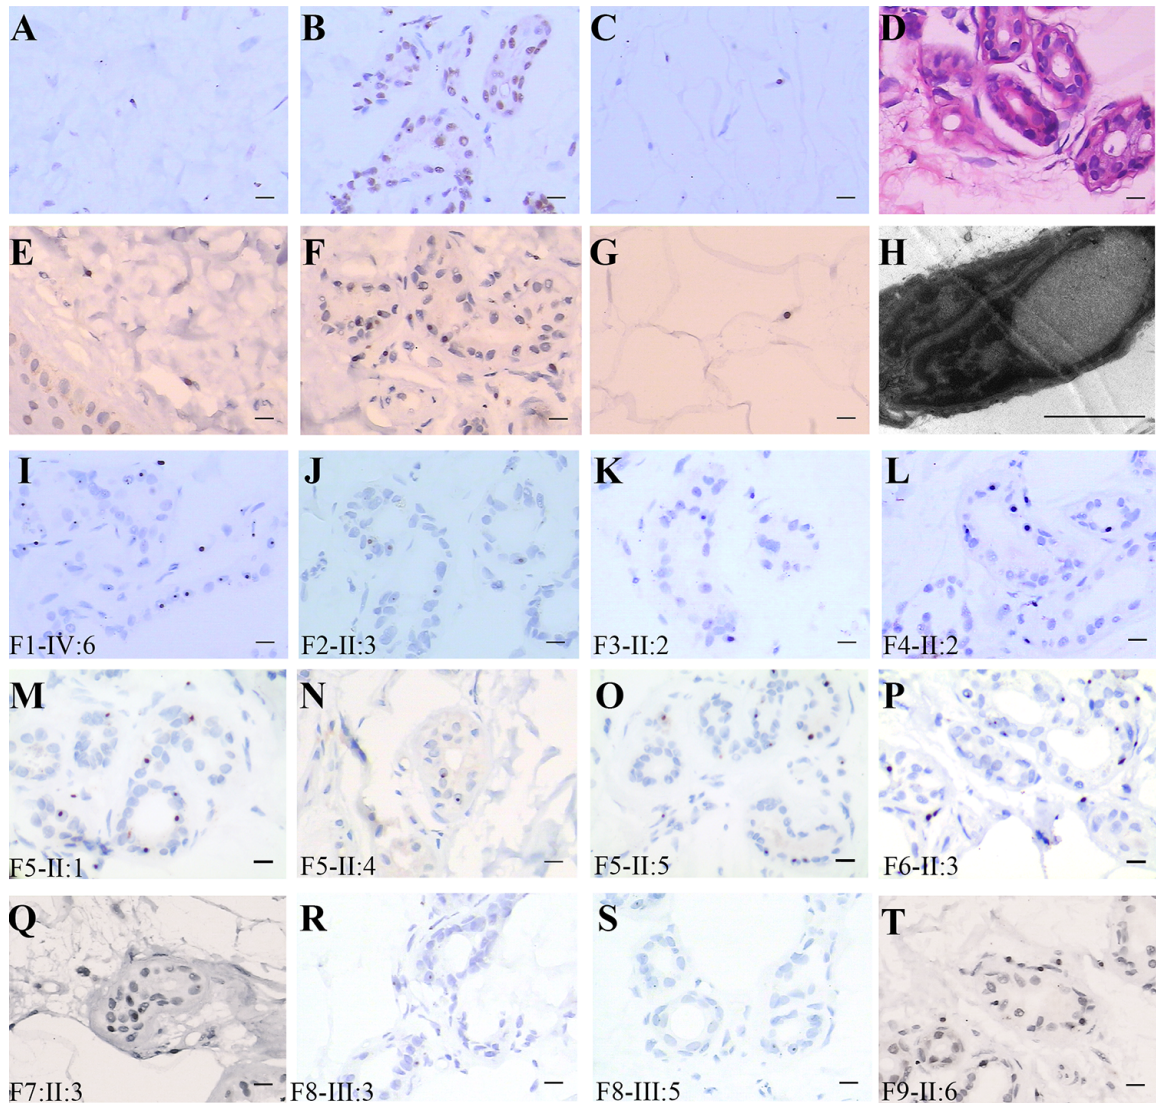

**Figure S3. Histopathological Features of NIID.** (A-C) Representative skin biopsy samples showing ubiquitin-positive intranuclear inclusions in fibroblasts (A), sweat gland cells (B), and adipocytes (C). Scale bars, 10 $\mu$ m. (D) Representative skin biopsy samples revealed eosinophilic intranuclear inclusions in sweat gland cells. Scale bars, 10 $\mu$ m. (E-G) Representative skin biopsy samples indicated p62-positive intranuclear inclusions in fibroblasts (E), sweat gland cells (F), and adipocytes (G). Scale bars, 10 $\mu$ m. (H) Electron microscopy imaging displaying intranuclear inclusions without membrane. Scale bars, 2 $\mu$ m. (I-T) All skin samples showed p62-positive intranuclear inclusions. Scale bars, 10 $\mu$ m.



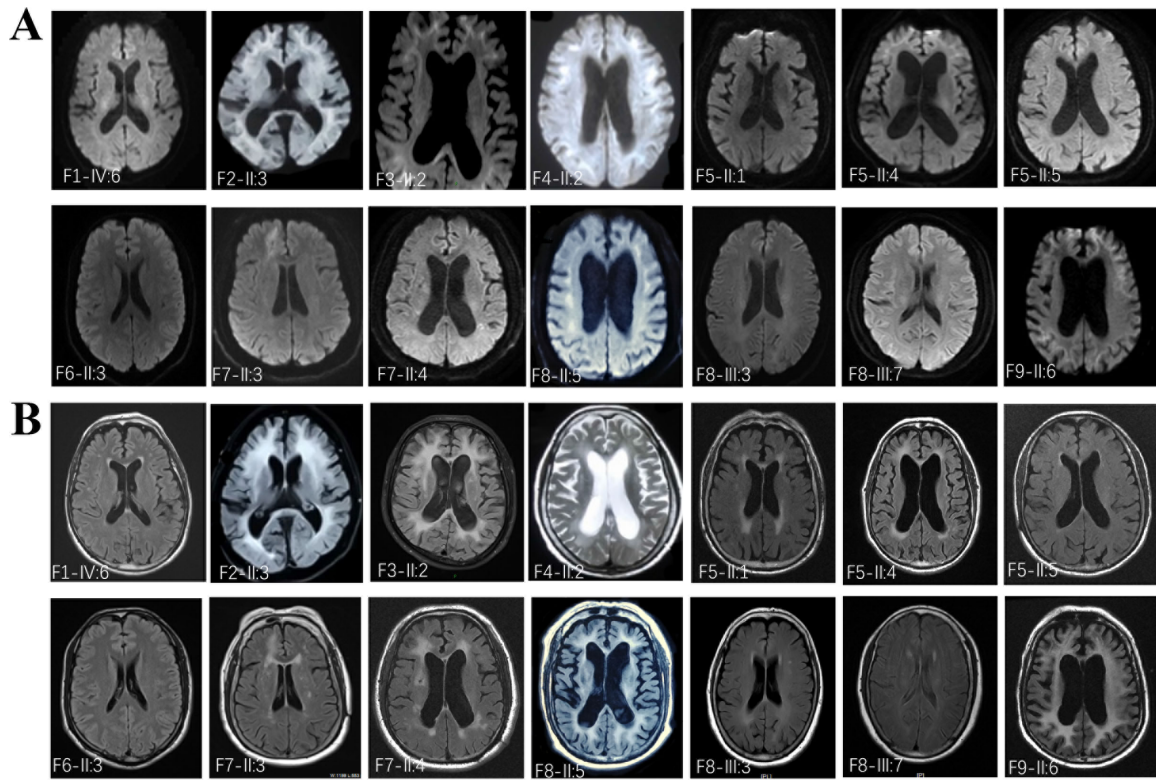

**Figure S4. MRI Imaging of NIID.** (A) DWI images of some NIID-affected case subjects revealed typical symmetrical high signal in corticomedullary junction. (B) Several NIID-affected case subjects showed severe white matter hyperintensity using FLAIR or T2 weighted image.



**Table S2. Clinical Features of Parkinsonism-dominant Type (families 5-7)**

|                                   | Family 5 |      |      | Family 6 |      |      | Family 7 |      |      |
|-----------------------------------|----------|------|------|----------|------|------|----------|------|------|
|                                   | II:1     | II:4 | II:5 | I:1      | II:2 | II:3 | I:1      | II:3 | II:4 |
| Sex                               | M        | M    | M    | M        | M    | M    | M        | F    | M    |
| Age at onset                      | 75       | 58   | 66   | 78       | 37   | 46   | 58       | 66   | 61   |
| Disease duration                  | 2        | 11   | 2    | 1        | 15   | 3    | 10       | 6    | 4    |
| Clinical manifestations           |          |      |      |          |      |      |          |      |      |
| Dementia                          | -        | -    | -    | -        | -    | -    | -        | -    | -    |
| Abnormal behavior                 | -        | -    | -    | -        | -    | -    | -        | -    | -    |
| Peripheral neuropathy             |          |      |      |          |      |      |          |      |      |
| Muscle weakness                   | -        | +    | -    | -        | -    | -    | -        | -    | -    |
| Sensory disturbance               | +        | -    | -    | +        | -    | -    | -        | +    | +    |
| Autonomic dysfunction             |          |      |      |          |      |      |          |      |      |
| Bladder dysfunction               | -        | ++   | -    | -        | -    | +    | +++      | ++   | +++  |
| Miosis                            | -        | -    | -    | -        | -    | -    | /        | -    | -    |
| Parkinsonism                      |          |      |      |          |      |      |          |      |      |
| Tremor                            | +        | ++   | -    | -        | +    | -    | -        | +    | +    |
| Rigidity                          | +        | ++   | +    | +        | +    | +    | +        | ++   | +    |
| Bradykinesia                      | +        | ++   | +    | +        | +    | ++   | +        | ++   | +    |
| Ataxia                            | -        | +    | -    | -        | -    | -    | ++       | +    | ++   |
| Neurological attack               |          |      |      |          |      |      | -        |      |      |
| Disturbance of consciousness      | -        | +    | -    | -        | -    | -    | -        | -    | -    |
| Stroke-like episode               | -        | +    | +    | -        | -    | -    | -        | -    | -    |
| encephalitic episode              | -        | -    | -    | -        | -    | -    | -        | -    | -    |
| Brain MRI                         |          |      |      |          |      |      |          |      |      |
| Severe leukoencephalopathy        | -        | +    | -    | /        | /    | -    | /        | -    | +    |
| DWI U-fiber high signal           | -        | +    | -    | /        | /    | -    | /        | -    | -    |
| Cognitive function test           |          |      |      |          |      |      |          |      |      |
| MMSE (<education matched average) | 26       | 27   | 26   | /        | 29   | 30   | /        | 22   | 25   |
| MoCA (<education matched average) | 19       | 15   | 19   | /        | /    | 25   | /        | /    | 23   |
| Nerve conduction                  |          |      |      |          |      |      |          |      |      |
| Motor                             |          |      |      |          |      |      |          |      |      |
| MCV slowing                       | +        | +    | +    | /        | /    | +    | /        | ++   | +    |
| CMAP reduction                    | +        | -    | -    | /        | /    | -    | /        | -    | +    |
| Sensory                           |          |      |      |          |      |      |          |      |      |
| SCV slowing                       | +        | -    | -    | /        | /    | -    | /        | ++   | +    |
| SNAP reduction                    | -        | -    | -    | /        | /    | -    | /        | +    | +    |
| Skin biopsy                       | +        | +    | +    | /        | /    | +    | /        | +    | /    |

**Table S3. Clinical Features of Dementia-dominant Type (families 3, 4, 8, 9)**

|                                   | Family 3 |      |      | Family 4 |      | Family 8 |      |      | Family 9 |       |       |       |     |      |      |      |
|-----------------------------------|----------|------|------|----------|------|----------|------|------|----------|-------|-------|-------|-----|------|------|------|
|                                   | I:2      | II:2 | II:3 | II:2     | II:5 | I:1      | II:3 | II:5 | II:8     | III:3 | III:5 | III:7 | I:2 | II:2 | II:3 | II:6 |
| Sex                               | F        | M    | F    | F        | F    | M        | F    | M    | M        | F     | F     | F     | F   | M    | F    | M    |
| Age at onset                      | 71       | 42   | 63   | 49       | 31   | 65       | 60   | 60   | 60       | 60    | 58    | 59    | 60  | 60   | 60   | 71   |
| Disease duration                  | 20       | 19   | 2    | 18       | 30   | 5        | 8    | 19   | 16       | 7     | 5     | 3     | 15  | 10   | 12   | 10   |
| Clinical manifestations           |          |      |      |          |      |          |      |      |          |       |       |       |     |      |      |      |
| Dementia                          | ++       | -    | +    | +        | ++   | +++      | +++  | +++  | +++      | ++    | +     | -     | ++  | ++   | ++   | +++  |
| Abnormal behavior                 | ++       | ++   | +    | ++       | +++  | ++       | ++   | ++   | ++       | -     | -     | -     | ++  | ++   | ++   | +    |
| Peripheral neuropathy             |          |      |      |          |      |          |      |      |          |       |       |       |     |      |      |      |
| Muscle weakness                   | -        | -    | +    | -        | -    | /        | -    | +    | -        | -     | -     | +     | -   | -    | -    | +    |
| Sensory disturbance               | +        | -    | +    | -        | -    | /        | -    | +    | -        | -     | +     | +     | -   | -    | -    | -    |
| Autonomic dysfunction             |          |      |      |          |      |          |      |      |          |       |       |       |     |      |      |      |
| Bladder dysfunction               | +        | -    | ++   | ++       | -    | +        | +++  | +++  | +++      | -     | ++    | +++   | /   | +++  | +++  | +++  |
| Miosis                            | -        | -    | -    | +        | +    | /        | /    | +    | /        | -     | -     | -     | /   | /    | /    | +    |
| Parkinsonism                      |          |      |      |          |      |          |      |      |          |       |       |       |     |      |      |      |
| Tremor                            | -        | -    | -    | +        | -    | -        | -    | +    | -        | -     | -     | -     | -   | -    | -    | +    |
| Rigidity                          | -        | -    | -    | ++       | -    | -        | -    | -    | -        | -     | -     | -     | -   | -    | -    | +    |
| Bradykinesia                      | -        | -    | -    | +        | -    | -        | -    | -    | -        | -     | -     | -     | -   | -    | -    | +    |
| Ataxia                            | +        | -    | -    | -        | -    | -        | -    | -    | -        | -     | -     | -     | -   | -    | -    | -    |
| Neurological attack               |          |      |      |          |      |          |      |      |          |       |       |       |     |      |      |      |
| Disturbance of consciousness      | -        | -    | -    | +        | -    | -        | -    | -    | -        | -     | +     | -     | -   | -    | -    | +    |
| Stroke-like episode               | -        | -    | -    | +        | -    | -        | -    | -    | -        | -     | -     | -     | -   | -    | -    | -    |
| encephalitic episode              | -        | -    | -    | -        | -    | -        | -    | -    | -        | -     | -     | -     | -   | -    | -    | +    |
| Brain MRI                         |          |      |      |          |      |          |      |      |          |       |       |       |     |      |      |      |
| Severe leukoencephalopathy        | /        | /    | +    | +        | /    | /        | /    | +    | /        | -     | -     | -     | /   | /    | /    | +    |
| DWI U-fiber high signal           | /        | /    | +    | +        | /    | /        | /    | +    | /        | -     | -     | -     | /   | /    | /    | +    |
| Cognitive function test           |          |      |      |          |      |          |      |      |          |       |       |       |     |      |      |      |
| MMSE (<education matched average) | 14       | 29   | /    | 15       | 12   | /        | /    | /    | /        | 10    | 26    | 29    | /   | /    | /    | /    |
| MoCA (<education matched average) | /        | 28   | /    | /        | /    | /        | /    | /    | /        | 3     | 20    | 26    | /   | /    | /    | /    |
| Nerve conduction                  |          |      |      |          |      |          |      |      |          |       |       |       |     |      |      |      |
| Motor                             |          |      |      |          |      |          |      |      |          |       |       |       |     |      |      |      |
| MCV slowing                       | /        | +    | /    | -        | /    | /        | /    | +    | /        | -     | +     | +     | /   | /    | /    | ++   |
| CMAP reduction                    | /        | +    | /    | -        | /    | /        | /    | +    | /        | -     | +     | +     | /   | /    |      | ++   |
| Sensory                           |          |      |      |          |      |          |      |      |          |       |       |       |     |      |      |      |
| SCV slowing                       | /        | +    | /    | -        | /    | /        | /    | +    | /        | -     | +     | +     | /   | /    | /    | +    |
| SNAP reduction                    | /        | +    | /    | -        | /    | /        | /    | +    | /        | -     | +     | +     | /   | /    | /    | +    |
| Skin biopsy                       | /        | +    | /    | +        | /    | /        | /    | /    | /        | +     | +     | +     | /   | /    | /    | +    |

**Table S4. Clinical Features of Sporadic NIID-affected Case Subjects**

|                                   | Sporadic Case Subjects |     |                    |     |     |
|-----------------------------------|------------------------|-----|--------------------|-----|-----|
|                                   | Dementia               |     | Paroxysmal disease |     |     |
|                                   | SD1                    | SD2 | SP1                | SP2 | SP3 |
| Sex                               | F                      | F   | M                  | M   | F   |
| Age at onset                      | 65                     | 69  | 68                 | 51  | 57  |
| Disease duration                  | 14                     | 2   | 1                  | 5   | 6   |
| Clinical manifestations           |                        |     |                    |     |     |
| Dementia                          | ++                     | ++  | -                  | -   | -   |
| Abnormal behavior                 | ++                     | +   | -                  | -   | -   |
| Peripheral neuropathy             |                        |     |                    |     |     |
| Muscle weakness                   | -                      | -   | -                  | -   | -   |
| Sensory disturbance               | -                      | -   | -                  | -   | -   |
| Autonomic dysfunction             |                        |     |                    |     |     |
| Bladder dysfunction               | +++                    | +++ | -                  | ++  | -   |
| Miosis                            | +                      | +   | -                  | -   | -   |
| Parkinsonism                      |                        |     |                    |     |     |
| Tremor                            | +                      | -   | -                  | -   | -   |
| Rigidity                          | +                      | -   | -                  | -   | -   |
| Bradykinesia                      | +                      | -   | -                  | -   | -   |
| Ataxia                            | -                      | -   | -                  | -   | -   |
| Neurological attack               |                        |     |                    |     |     |
| Disturbance of consciousness      | +                      | +   | +                  | +   | -   |
| Stroke-like episode               | +                      | +   | +                  | -   | +   |
| encephalitic episode              | +                      | +   | -                  | -   | +   |
| Brain MRI                         |                        |     |                    |     |     |
| Severe leukoencephalopathy        | +                      | +   | +                  | +   | +   |
| DWI U-fiber high signal           | +                      | +   | +                  | +   | +   |
| Cognitive function test           |                        |     |                    |     |     |
| MMSE (<education matched average) | /                      | /   | 27                 | 30  | /   |
| MoCA (<education matched average) | /                      | /   | 16                 | 29  | /   |
| Nerve conduction                  |                        |     |                    |     |     |
| Motor                             |                        |     |                    |     |     |
| MCV slowing                       | +                      | /   | +                  | +   | /   |
| CMAP reduction                    | +                      | /   | -                  | -   | /   |
| Sensory                           |                        |     |                    |     |     |
| SCV slowing                       | +                      | /   | +                  | +   | /   |
| SNAP reduction                    | +                      | /   | -                  | -   | /   |
| Skin biopsy                       | +                      | +   | +                  | +   | +   |
